# Supplementary material for: Heteroatom engineering for enhancing the thermoelectric power factor of molecular junctions
Source: Royal Society of Chemistry journal article supplement (doi:10.1039/d5ta01503k), 2025-01-01
Supplement: d5ta01503k1.pdf [file d5ta01503k1.pdf]

**Supporting Information for**

**Heteroatom engineering enhancing thermoelectric power factor of molecular junctions**

W. Peng, N. Chen, Y. Xie, Assoc. Prof. Y. Li

Key Laboratory of Organic Optoelectronics and Molecular Engineering, Department of Chemistry, Tsinghua University, Beijing 100084, China

E-mail: [yuanli\\_thu@tsinghua.edu.cn](mailto:yuanli_thu@tsinghua.edu.cn).

Assoc. Prof. L. Ma

State Key Laboratory of Metastable Materials Science & Technology and Key Laboratory for Microstructural Material Physics of Hebei Province, School of Science, Yanshan University, Qinhuangdao 066004, China

E-mail: [maliang-phy@ysu.edu.cn](mailto:maliang-phy@ysu.edu.cn).

Prof. J. Lü

School of Physics and Wuhan National High Magnetic Field Center, Huazhong University of Science and Technology, Wuhan 430074, China

Wuhan Institute of Quantum Technology, Wuhan 430074, China

E-mail: [jtl@hust.edu.cn](mailto:jtl@hust.edu.cn).

## 17 S1. Synthesis.

18 **General Methods.** All reagents and solvents were purchased from commercial sources and  
19 used. Manipulations were performed under a normal laboratory atmosphere unless otherwise  
20 noted. Nuclear magnetic resonance (NMR) spectra were recorded at ambient temperature using  
21 Bruker AVANCE III 400 spectrometers, with working frequencies of 400 MHz for  $^1\text{H}$  and 100  
22 MHz for  $^{13}\text{C}$ , respectively. Chemical shifts are reported in ppm relative to the residual internal  
23 non-deuterated solvent signals ( $\text{CDCl}_3$ ). The samples were performed with a Waters Synapt  
24 G2-Si ESI-Q-TOF High resolution MS system, equipped with a Waters Acquity H class Ultra  
25 High Performance Liquid Chromatograph (UHPLC).

## 26 Synthesis and Characterization of Compounds

27 **5-iodo-1-pentylthioacetate (I-C<sub>5</sub>-SAc)** as prepared according to a literature method.[1] 1, 5-  
28 diiodopentane (10.00 g, 30.80 mmol) and potassium thioacetate (0.87 g, 7.70 mmol) were  
29 added into 300 mL tetrahydrofuran, stirred for 12h at room temperature, followed by removal  
30 of the acetone under reduced pressure. The residue was dissolved in diethyl ether, filtered, and  
31 washed with DI water. The organic layer was dried over  $\text{Na}_2\text{SO}_4$ , filtered and concentrated  
32 after which the raw product was purified with column chromatography with ethyl acetate and  
33 hexane (1: 10). Yield: 1.57 g (6.90 mmol) 5-iodo-1-pentylthioacetate (89.0 % yield).  $^1\text{H}$  NMR  
34 (400 MHz,  $\text{CDCl}_3$ )  $\delta$  3.18 (t,  $J$  = 6.9 Hz, 2H), 2.87 (t,  $J$  = 7.2 Hz, 2H), 2.33 (s, 3H), 1.84 (p,  $J$   
35 = 7.1 Hz, 2H), 1.64 – 1.56 (m, 2H), 1.52 – 1.44 (m, 2H).  $^{13}\text{C}$  NMR (100 MHz, Chloroform- $d$ )  
36  $\delta$  195.77, 32.87, 30.70, 29.59, 28.80, 28.51, 6.61. HRMS (ESI $^+$ ):  $m/z$  calc for  $\text{C}_7\text{H}_{13}\text{IOS}$  [ $\text{M}+\text{H}$ ]  
37  $^+$  272.9810, found 272.9806.

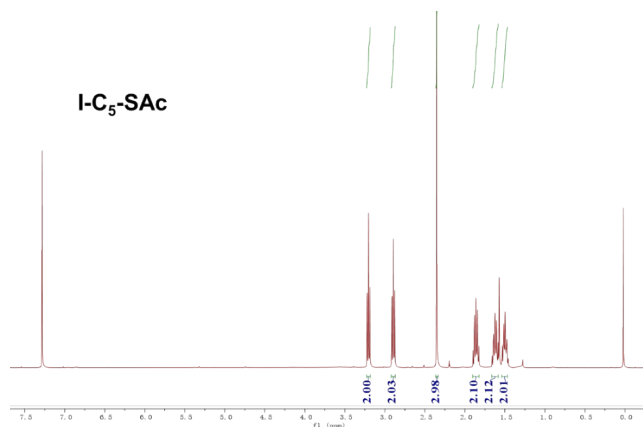

39 **Fig. S1.** The  $^1\text{H}$ -NMR spectrum of compound I-C<sub>5</sub>-SAc.

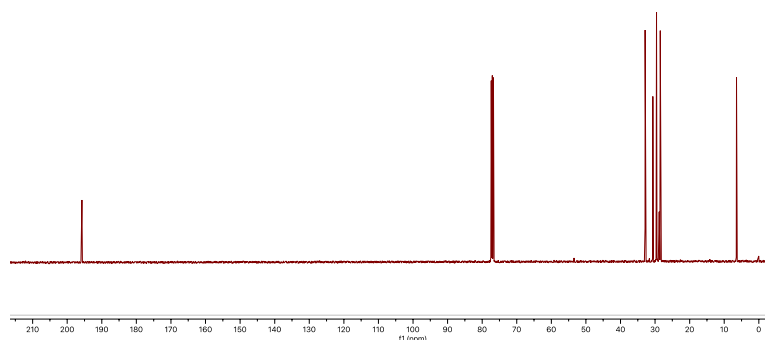

**Fig. S2.** The  $^{13}\text{C}$ -NMR spectrum of compound I-C<sub>5</sub>-SAc.

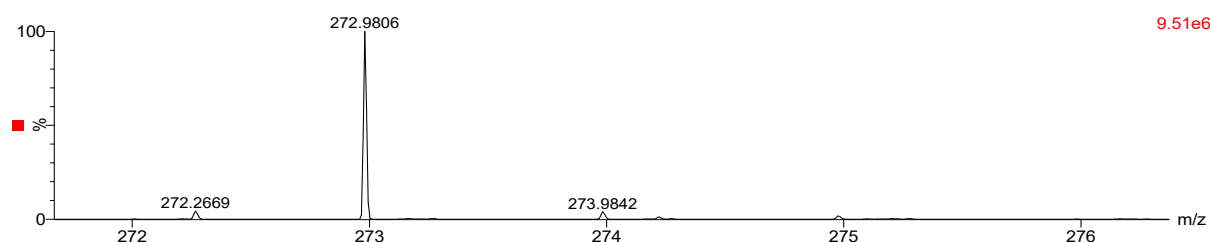

**Fig. S3.** The HRMS spectrum of compound I-C<sub>5</sub>-SAc.

**5-iodopentane-1-thiol (HS-C<sub>5</sub>-I)** was synthesized as follows. 5-iodo-1-pentylthioacetate was dissolved (1.37 g, 6.02 mmol) in 40 mL methanol and degassed for 20 min. Subsequently, 1.5 mL trifluoroacetic acid was added. The solution was refluxed for 5h then cooled down to room temperature. The solvent was removed by rotary evaporator; DCM was used to extract the product. The organic layer was washed with DI water 3 times before dried over anhydrous Na<sub>2</sub>SO<sub>4</sub>. After filtration and concentration, the raw product was purified by column chromatography with hexane as eluent. Yield: 18 % (0.25 g, 1.08 mmol).  $^1\text{H}$  NMR (400 MHz, Chloroform-*d*)  $\delta$  3.19 (t,  $J$  = 7.0 Hz, 2H), 2.57 – 2.51 (m, 2H), 1.84 (p,  $J$  = 7.0 Hz, 2H), 1.68 – 1.60 (m, 2H), 1.54 – 1.47 (m, 2H).  $^{13}\text{C}$  NMR (100 MHz, Chloroform-*d*)  $\delta$  38.70, 33.07, 29.35, 28.11, 6.57. HRMS (ESI<sup>+</sup>):  $m/z$  calc for C<sub>5</sub>H<sub>11</sub>IS [M+H]<sup>+</sup> 228.9548, found 228.9569.

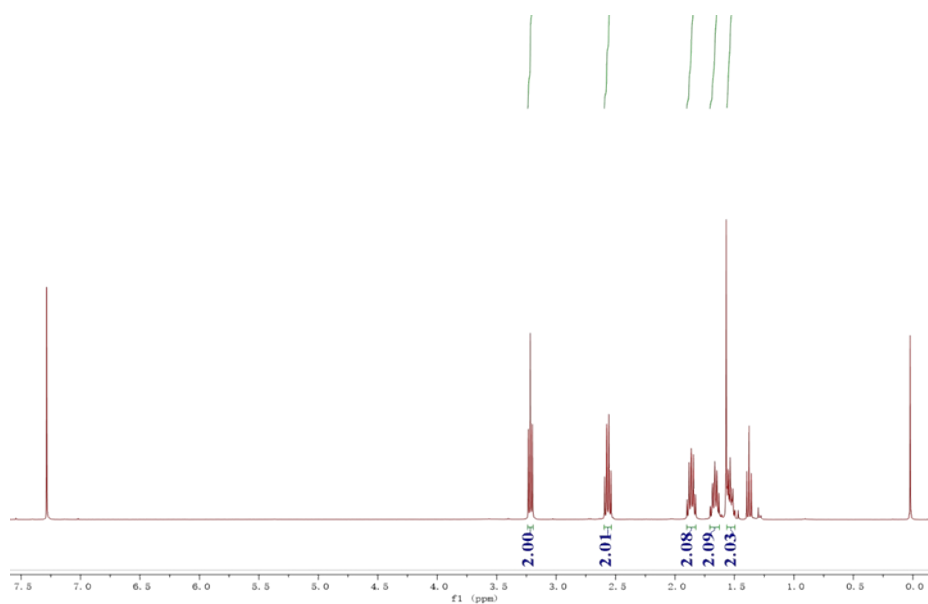

**Fig. S4.** The  $^1\text{H}$ -NMR spectrum of compound HS-C<sub>5</sub>-I.

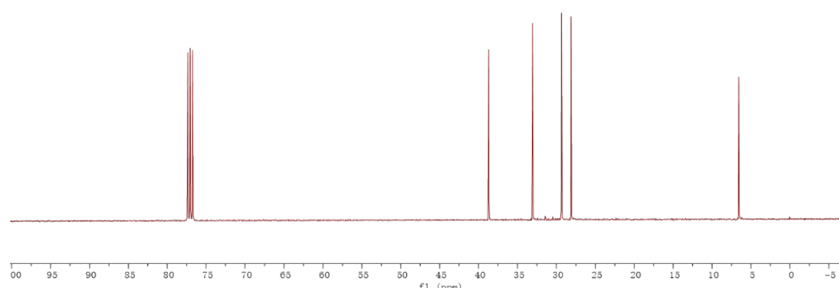

**Fig. S5.** The  $^{13}\text{C}$ -NMR spectrum of compound HS-C<sub>5</sub>-I.

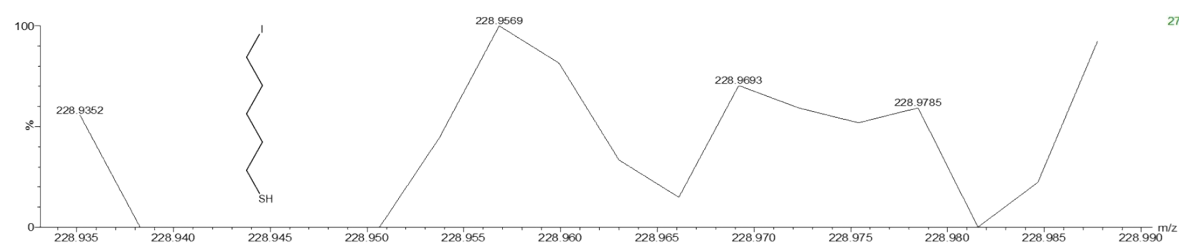

**Fig. S6.** The HRMS spectrum of compound HS-C<sub>5</sub>-I.

**S-(8-iodooctyl) ethanethioate (I-C<sub>8</sub>-SAc)** as prepared as follows.[1] 1,8-diiodooctane (5.00 g, 13.66 mmol) and potassium thioacetate (0.39 g, 3.42 mmol) were added into 200 mL tetrahydrofuran, stirred for 12h at room temperature, followed by removal of the tetrahydrofuran under reduced pressure. The residue was dissolved in diethyl ether, filtered,



66 and washed with DI water. The organic layer was dried over Na<sub>2</sub>SO<sub>4</sub>, filtered and concentrated  
 67 after which the raw product was purified with column chromatography with ethyl acetate and  
 68 hexane (1: 10). Yield: 0.95 g (3.04 mmol) *S*-(8-iodooctyl) ethanethioate (89.0 % yield). <sup>1</sup>H  
 69 NMR (400 MHz, Chloroform-*d*) δ 3.19 (t, *J* = 7.0 Hz, 2H), 2.87 (t, *J* = 7.3 Hz, 2H), 2.33 (s,  
 70 3H), 1.82 (p, *J* = 7.1 Hz, 2H), 1.60 – 1.56 (m, 2H), 1.32 (q, *J* = 6.1, 4.8 Hz, 8H). <sup>13</sup>C NMR (100  
 71 MHz, Chloroform-*d*) δ 196.03, 33.47, 30.68, 30.40, 29.46, 29.10, 28.88, 28.67, 28.36, 7.26.  
 72 HRMS (ESI<sup>+</sup>): *m/z* calc for C<sub>10</sub>H<sub>19</sub>IOS [M+H]<sup>+</sup> 315.0274, found 315.0270.

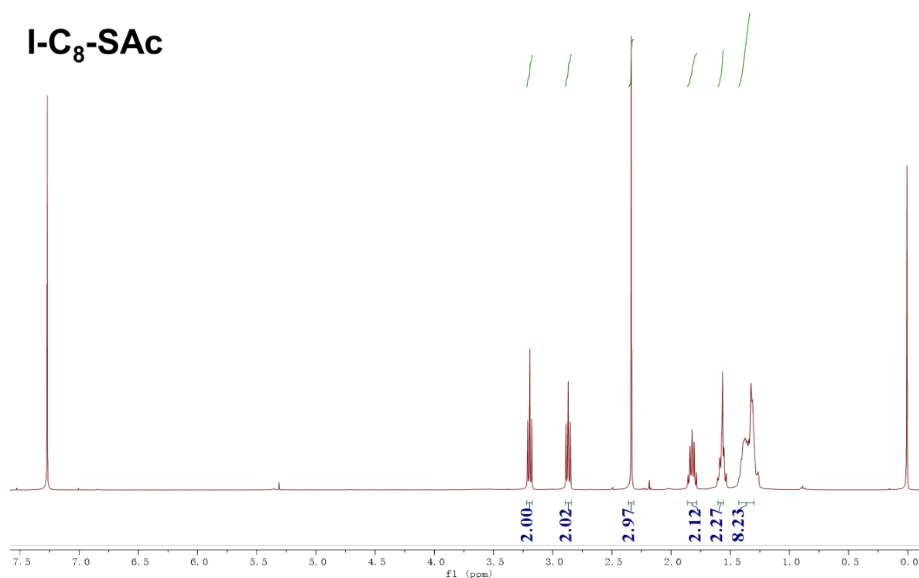

73

74 **Fig. S7.** The <sup>1</sup>H-NMR spectrum of compound I-C<sub>8</sub>-SAc.

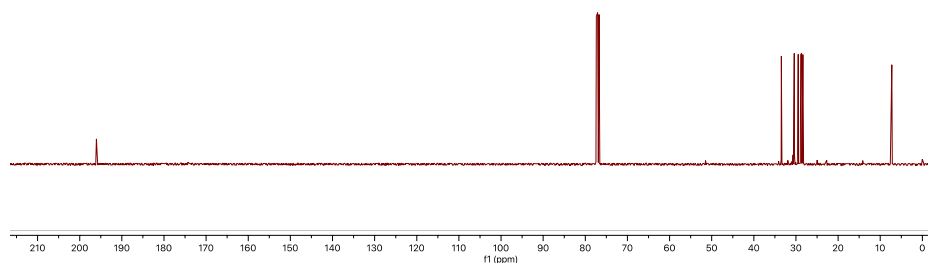

75

76 **Fig. S8.** The <sup>13</sup>C spectrum of compound I-C<sub>8</sub>-SAc.

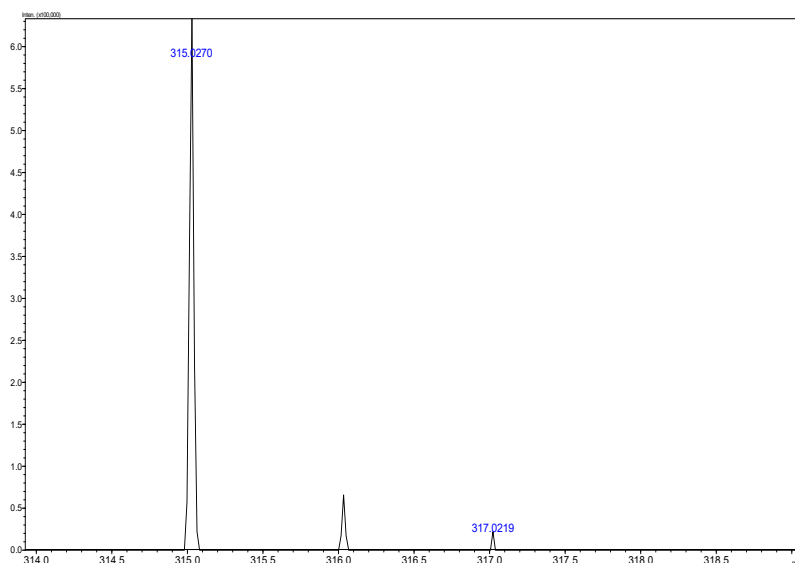

**Fig. S9.** The HRMS spectrum of compound I-C<sub>8</sub>-SAc.

**8-iodooctane-1-thiol (HS-C<sub>8</sub>-I)** was synthesized as follows. *S*-(8-iodooctyl) ethanethioate was dissolved (0.71 g, 2.27 mmol) in 30 mL methanol and degassed for 20 min. Subsequently, 1.0 mL trifluoroacetic acid was added. The solution was refluxed for 5h then cooled down to room temperature. The solvent was removed by rotary evaporator; DCM was used to extract the product. The organic layer was washed with DI water 3 times before dried over anhydrous Na<sub>2</sub>SO<sub>4</sub>. After filtration and concentration, the raw product was purified by column chromatography with hexane as eluent. Yield: 18 % (0.11 g, 0.41 mmol). <sup>1</sup>H NMR (400 MHz, Chloroform-*d*) δ 3.21 (t, *J* = 7.0 Hz, 2H), 2.55 (q, *J* = 7.4 Hz, 2H), 1.84 (p, *J* = 7.1 Hz, 2H), 1.63 (t, *J* = 7.4 Hz, 2H), 1.45 – 1.33 (m, 8H). <sup>13</sup>C NMR (100 MHz, Chloroform-*d*) δ 33.96, 33.49, 30.42, 29.66, 28.86, 28.42, 28.25, 24.63, 7.27. HRMS (ESI<sup>+</sup>): *m/z* calc for C<sub>8</sub>H<sub>16</sub>IS [M+H]<sup>+</sup> 271.0017, found 271.0226.

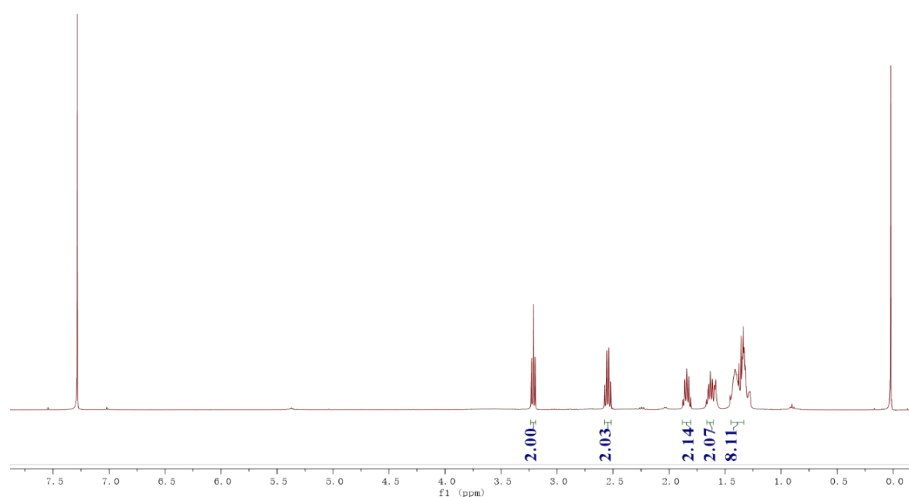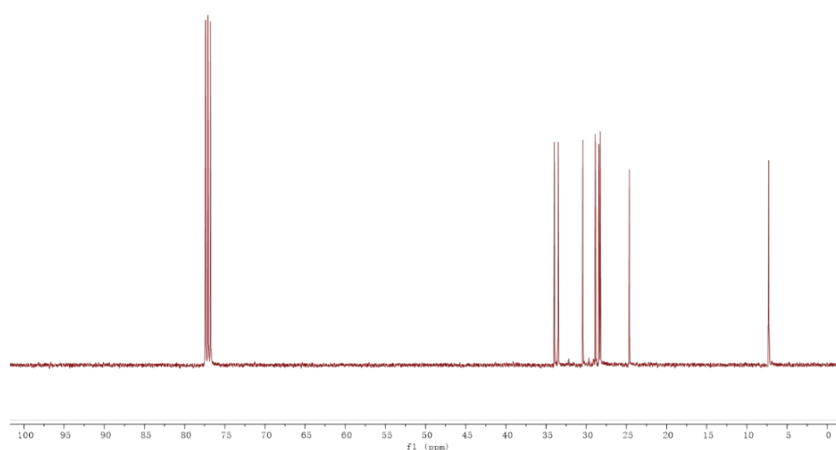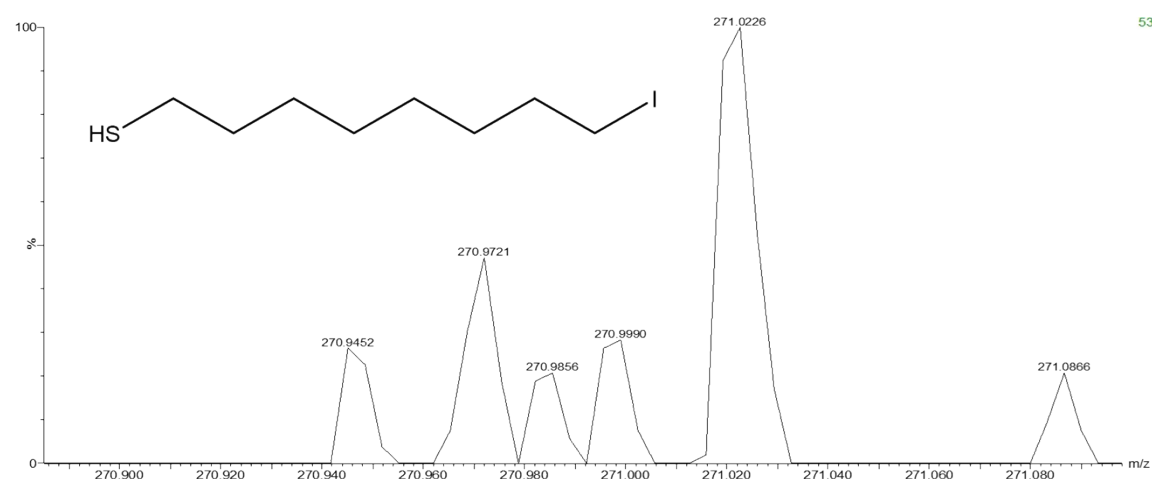

99 **1,11-diiodoundecane (I-C<sub>11</sub>-I)** was prepared as follows.[1] 1,11-dibromoundecane (11.80 g,  
 100 34.60 mmol) and sodium iodide (15.00 g, 138.00 mmol) were added into 300 mL acetone,  
 101 refluxed for 5h, cooled down, followed by removal of the acetone under reduced pressure. The  
 102 residue was dissolved in diethyl ether, filtered, and washed with DI water. The organic layer  
 103 was dried over Na<sub>2</sub>SO<sub>4</sub>, filtered and concentrated after which the raw product was purified with  
 104 column chromatography with hexane. Yield: 12.7 g (31.14 mmol) 1,11-diiodoundecane (90.0 %  
 105 yield). <sup>1</sup>H NMR (400 MHz, Chloroform-*d*) δ 3.20 (td, *J* = 7.1, 1.6 Hz, 4H), 1.88 – 1.79 (m,  
 106 4H), 1.39 (q, *J* = 6.8 Hz, 4H), 1.29 (s, 10H).

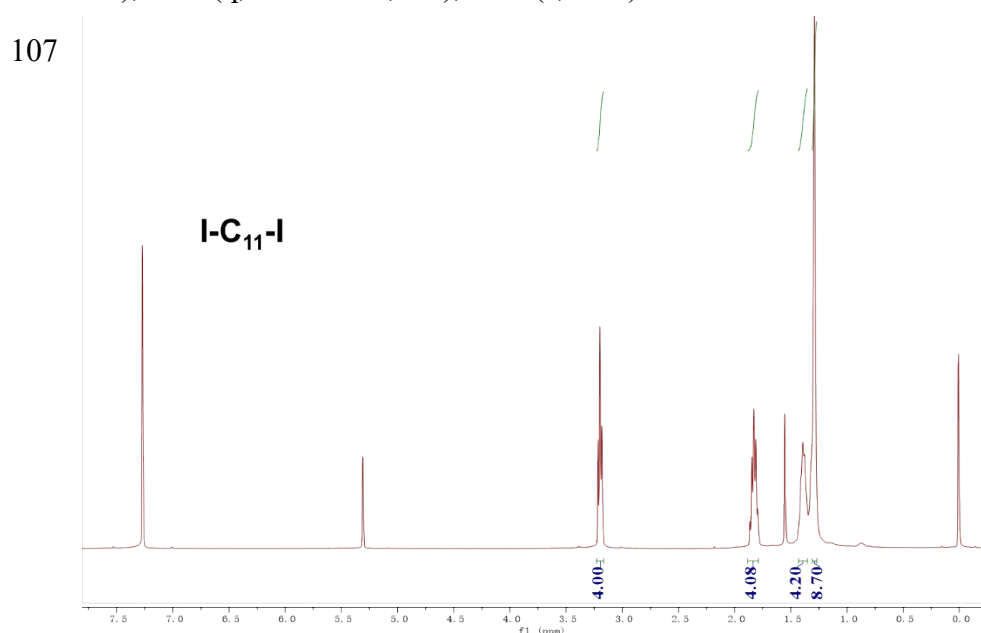

108 **Fig. S13.** The <sup>1</sup>H-NMR spectrum of compound I-C<sub>11</sub>-I.

109

110 ***S*-(11-iodoundecyl) ethanethioate (I-C<sub>11</sub>-SAc)** was prepared as follows[1]. 1,11-  
 111 diiodoundecane (17.00 g, 41.7 mmol) and potassium thioacetate (1.20 g, 10.50 mmol) were  
 112 added into 300 mL tetrahydrofuran, stirred for 12h at room temperature, followed by removal  
 113 of the tetrahydrofuran under reduced pressure. The residue was dissolved in diethyl ether,  
 114 filtered, and washed with DI water. The organic layer was dried over Na<sub>2</sub>SO<sub>4</sub>, filtered and  
 115 concentrated after which the raw product was purified with column chromatography with  
 116 dichloromethane and hexane (1: 2). Yield: 3.32 g (9.35 mmol) *S*-(11-iodoundecyl)  
 117 ethanethioate (89.0 % yield). <sup>1</sup>H NMR (400 MHz, Chloroform-*d*) δ 3.21 (t, *J* = 7.0 Hz, 2H),

118 2.88 (t,  $J = 7.3$  Hz, 2H), 2.34 (s, 3H), 1.84 (p,  $J = 7.1$  Hz, 2H), 1.61 – 1.55 (m, 3H), 1.43 – 1.27  
 119 (m, 14H).

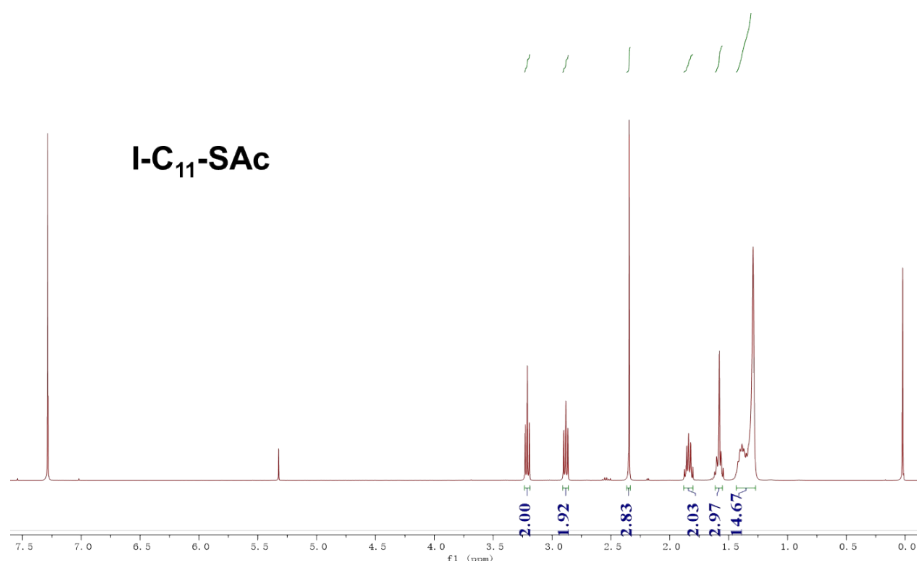

120  
 121 **Fig. S14.** The  $^1\text{H}$ -NMR spectrum of compound I-C<sub>11</sub>-SAc.

122  
 123 **11-iodoundecane-1-thiol (HS-C<sub>11</sub>-I)** was prepared as follows. *S*-(11-iodoundecyl)  
 124 ethanethioate (2.17 g, 6.11 mmol) was dissolved in 50 mL methanol and degassed for 20 min.  
 125 Subsequently, 4.0 mL trifluoroacetic acid was added. The solution was refluxed for 5h then  
 126 cooled down to room temperature. The solvent was removed by rotary evaporator; DCM was  
 127 used to extract the product. The organic layer was washed with DI water 3 times before dried  
 128 over anhydrous Na<sub>2</sub>SO<sub>4</sub>. After filtration and concentration, the raw product was purified by  
 129 column chromatography with dichloromethane and hexane (1: 2) as eluent. Yield: 18 % (0.36  
 130 g, 1.10 mmol).  $^1\text{H}$  NMR (400 MHz, Chloroform-*d*)  $\delta$  3.18 (t,  $J = 7.0$  Hz, 2H), 2.51 (q,  $J = 7.4$   
 131 Hz, 2H), 1.81 (p,  $J = 7.1$  Hz, 2H), 1.59 (p,  $J = 7.2$  Hz, 2H), 1.37 – 1.24 (m, 14H).  $^{13}\text{C}$  NMR  
 132 (100 MHz, Chloroform-*d*)  $\delta$  34.05, 33.57, 30.51, 29.47, 29.40, 29.07, 28.54, 28.38, 24.68, 7.36.  
 133 HRMS (ESI<sup>+</sup>):  $m/z$  calc for C<sub>11</sub>H<sub>22</sub>IS [M+H]<sup>+</sup> 313.0487, found 313.0439.

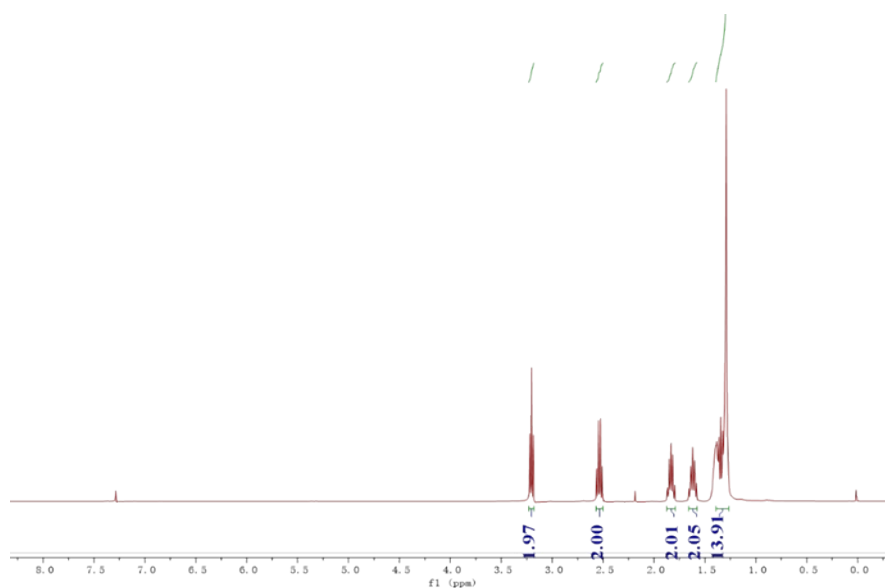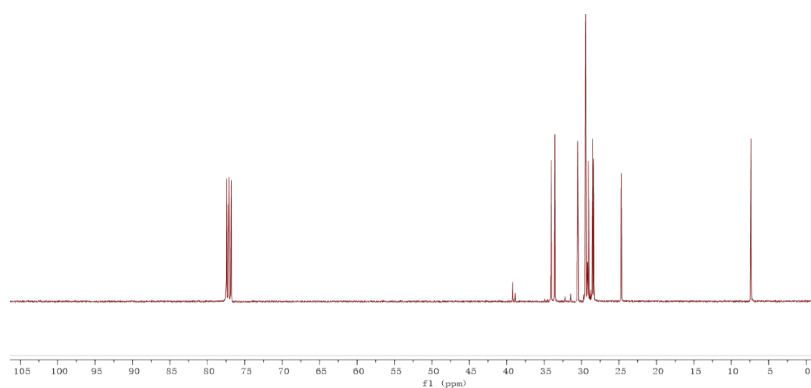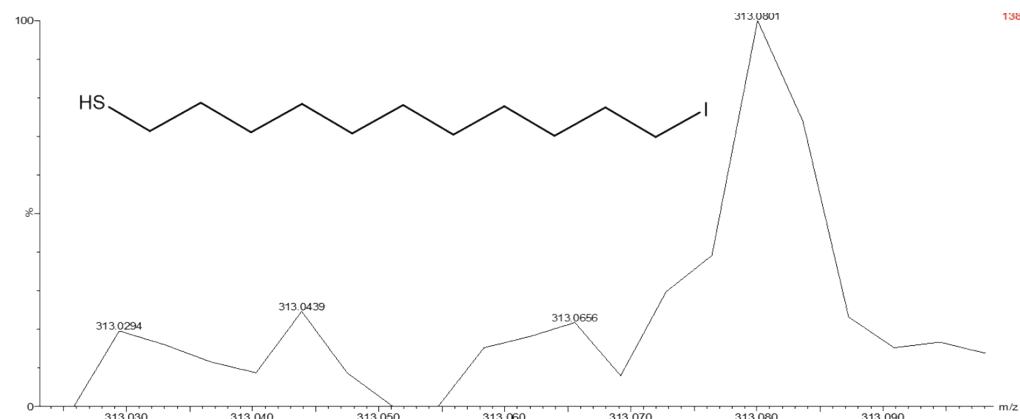

143 added to a stirred solution of N-bromosuccinamide (NBS, 2.67 g, 15 mmol) in 50 mL THF at  
 144 0 °C. With vigorous stirring, a solution of 1,14-tetradecanediol (1.00 g, 4.34 mmol) in 25 mL  
 145 THF was slowly added to the mixture of NBS and Ph<sub>3</sub>P. The resulting solution was warmed to  
 146 rt and then heated at 50 °C for 3.5 h. The THF was then removed under reduced pressure and  
 147 the residue crystallized from ethanol to obtain 1.1 g of the product as a white powder (70%  
 148 yield). <sup>1</sup>H NMR (400 MHz, Chloroform-*d*) δ 3.43 (t, *J* = 6.9 Hz, 4H), 1.88 (p, *J* = 6.9 Hz, 4H),  
 149 1.44 (q, *J* = 7.0 Hz, 4H), 1.30 (d, *J* = 6.4 Hz, 16H).

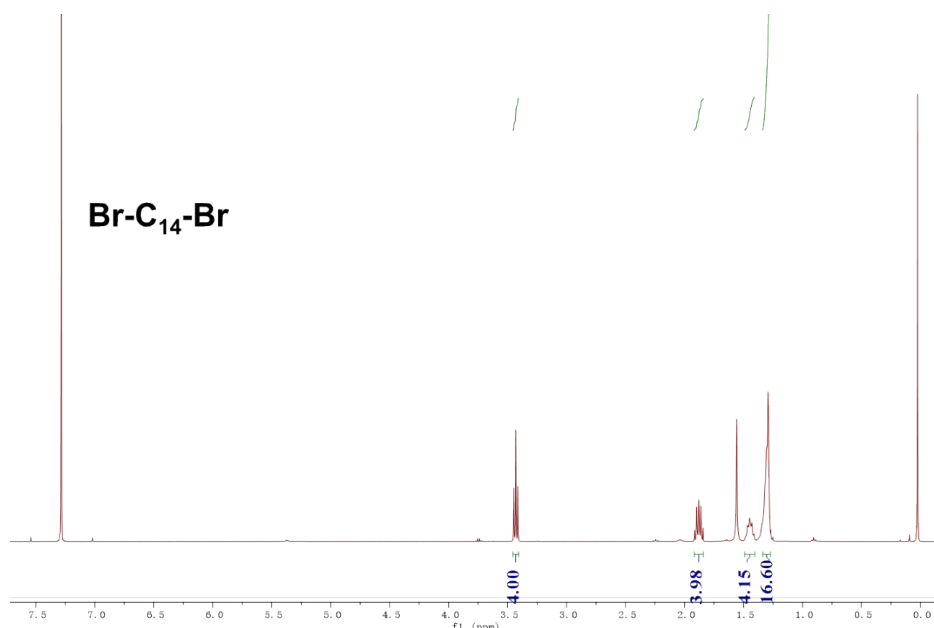

150  
 151 **Fig. S18.** The <sup>1</sup>H-NMR spectrum of compound Br-C<sub>14</sub>-Br.

152  
 153 **1,14-diiodotetradecane (I-C<sub>14</sub>-I)** was prepared as follows[1]. 1,14-dibromotetradecane (2.52 g,  
 154 7.00 mmol) and sodium iodide (4.00 g, 28.00 mmol) were added into 200 mL acetone, refluxed  
 155 for 5h, cooled down, followed by removal of the acetone under reduced pressure. The residue  
 156 was dissolved in diethyl ether, filtered, and washed with DI water. The organic layer was dried  
 157 over Na<sub>2</sub>SO<sub>4</sub>, filtered and concentrated after which the raw product was purified with column  
 158 chromatography with hexane. Yield: 2.84 g (6.30 mmol) 1,14-diiodotetradecane (90.0 %  
 159 yield). <sup>1</sup>H NMR (400 MHz, Chloroform-*d*) δ 3.20 (t, *J* = 7.0 Hz, 4H), 1.83 (p, *J* = 7.1 Hz, 4H),  
 160 1.43 – 1.36 (m, 4H), 1.32 – 1.26 (m, 16H).

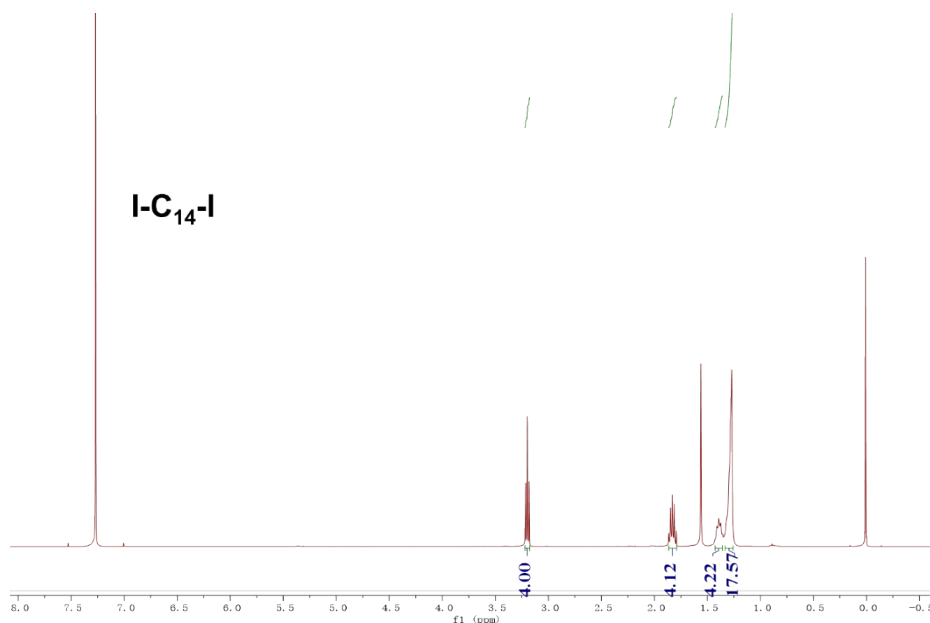

**Fig. S19.** The <sup>1</sup>H-NMR spectrum of compound I-C<sub>14</sub>-I.

***S*-(14-iodotetradecyl) ethanethioate (I-C<sub>14</sub>-SAc)** was prepared as follows.[1] 1,14-diiodotetradecane (13.56 g, 30.00 mmol) and potassium thioacetate (1.05 g, 7.50 mmol) were added into 300 mL tetrahydrofuran, stirred for 12h at room temperature, followed by removal of the tetrahydrofuran under reduced pressure. The residue was dissolved in diethyl ether, filtered, and washed with DI water. The organic layer was dried over Na<sub>2</sub>SO<sub>4</sub>, filtered and concentrated after which the raw product was purified with column chromatography with dichloromethane and hexane (1: 2). Yield: 2.60 g (6.68 mmol) *S*-(14-iodotetradecyl) ethanethioate (89.0 % yield). <sup>1</sup>H NMR (400 MHz, Chloroform-*d*) δ 3.21 (t, *J* = 7.0 Hz, 2H), 2.89 (t, *J* = 7.4 Hz, 2H), 2.35 (s, 3H), 1.84 (p, *J* = 7.1 Hz, 2H), 1.61 (d, *J* = 7.0 Hz, 2H), 1.28 (s, 20H).



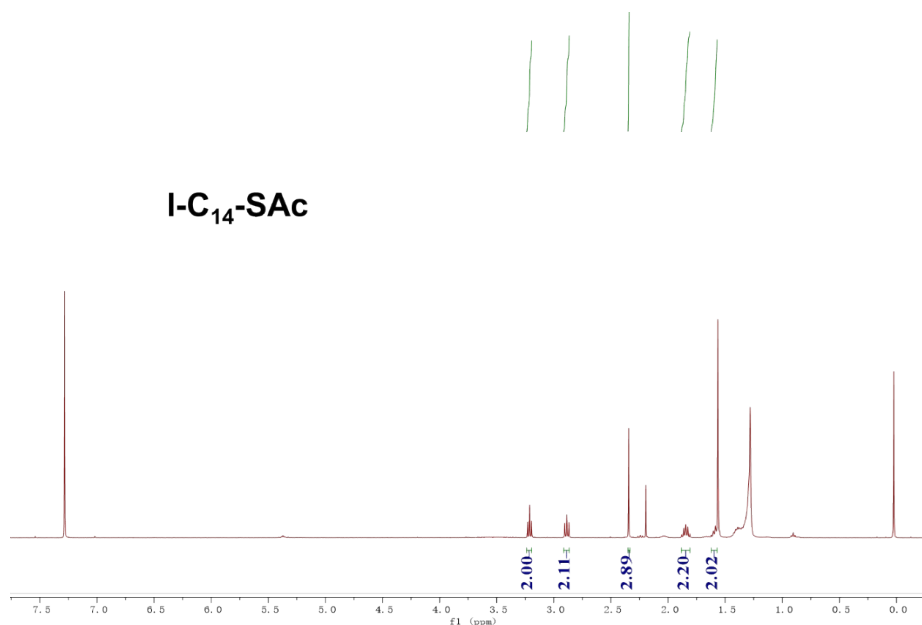

174

175 **Fig. S20.** The <sup>1</sup>H-NMR spectrum of compound I-C<sub>14</sub>-SAc.

176

177 **14-iodotetradecane-1-thiol (HS-C<sub>14</sub>-I)** was prepared as follows. *S*-(14-iodotetradecyl)

178 ethanethioate (2.08 g, 5.22 mmol) was dissolved in 50 mL methanol and degassed for 20 min.

179 Subsequently, 4.0 mL trifluoroacetic acid was added. The solution was refluxed for 5h then

180 cooled down to room temperature. The solvent was removed by rotary evaporator; DCM was

181 used to extract the product. The organic layer was washed with DI water 3 times before dried

182 over anhydrous Na<sub>2</sub>SO<sub>4</sub>. After filtration and concentration, the raw product was purified by

183 column chromatography with dichloromethane and hexane (1: 2) as eluent. Yield: 18 % (0.33

184 g, 0.94 mmol). <sup>1</sup>H NMR (400 MHz, Chloroform-*d*) δ 3.21 (t, *J* = 7.1 Hz, 2H), 2.55 (q, *J* = 7.4

185 Hz, 2H), 1.84 (p, *J* = 7.1 Hz, 2H), 1.63 (t, *J* = 7.4 Hz, 2H), 1.39 – 1.27 (m, 20H). <sup>13</sup>C NMR

186 (100 MHz, Chloroform-*d*) δ 34.10, 33.61, 30.55, 29.65, 29.63, 29.62, 29.58, 29.56, 29.46,

187 29.12, 28.59, 28.42, 24.70, 7.29. HRMS (ESI<sup>+</sup>): *m/z* calc for C<sub>14</sub>H<sub>28</sub>IS [M+H]<sup>+</sup> 355.0956,

188 found 355.0986.

189

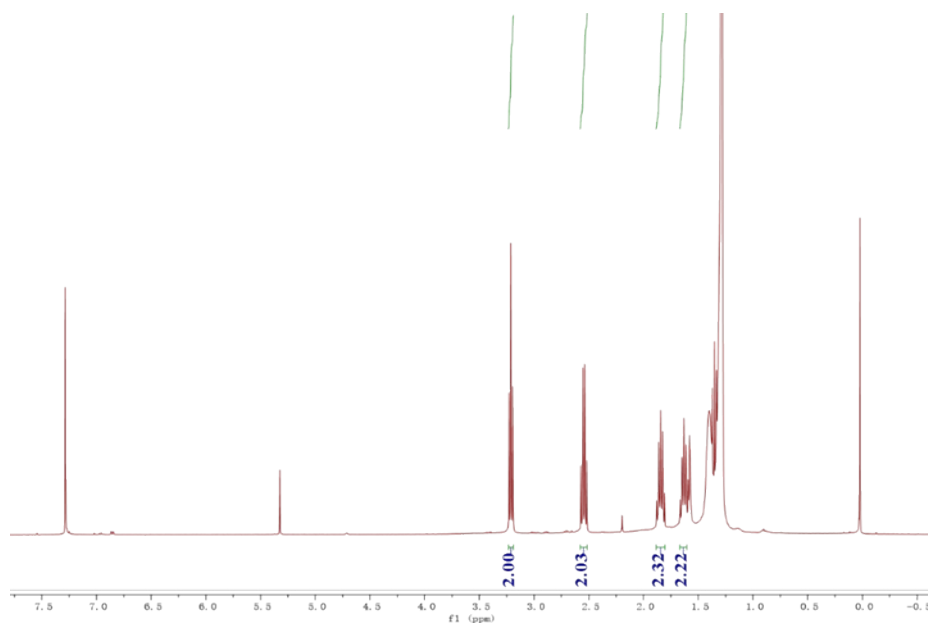

190

191 **Fig. S21.** The  $^1\text{H}$ -NMR spectrum of compound HS-C<sub>14</sub>-I.

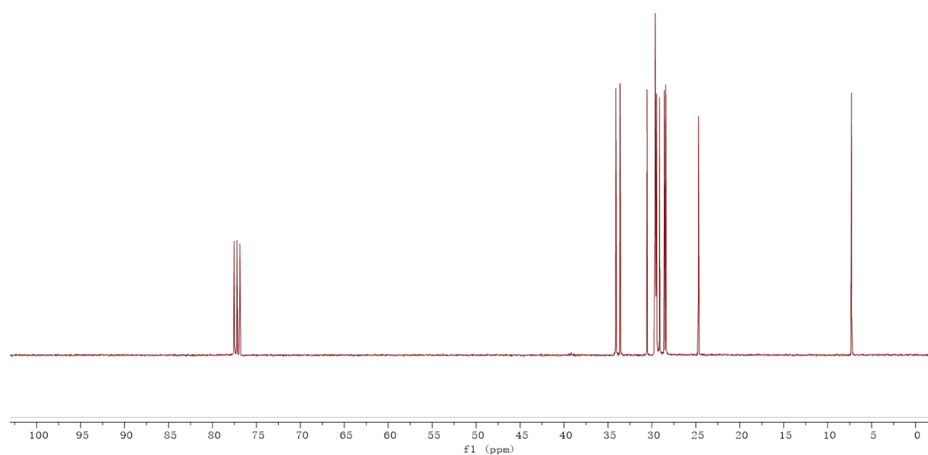

192

193 **Fig. S22.** The  $^{13}\text{C}$ -NMR spectrum of compound HS-C<sub>14</sub>-I.

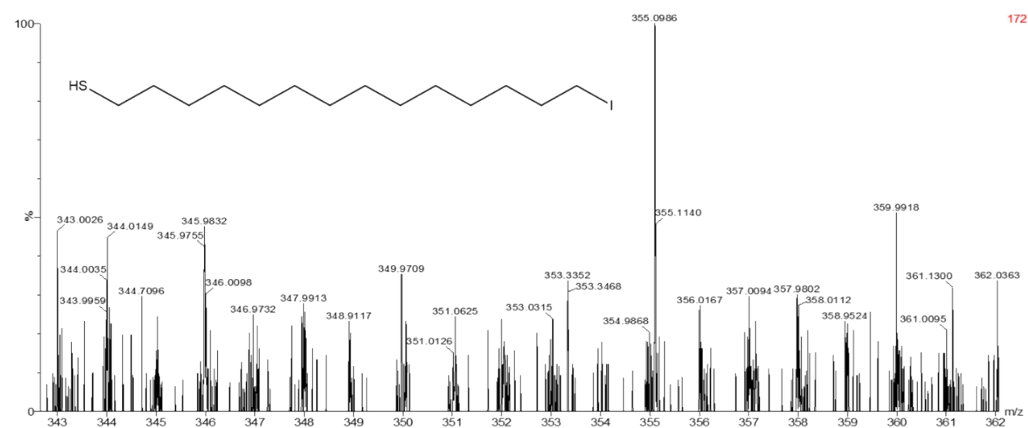

194

195 **Fig. S23.** The HRMS spectrum of compound I-C<sub>14</sub>-SH.

196

197 ***S*-(2-(2-ethoxyethoxy)ethyl) ethanethioate ((C<sub>2</sub>O)<sub>2</sub>-C<sub>2</sub>-SAc)** was prepared as follows.[1] 1-  
 198 bromo-2-(2-ethoxyethoxy)ethane (1.97 g, 10.00 mmol) and potassium thioacetate (4.56 g,  
 199 40.00 mmol) were added into 300 mL tetrahydrofuran, refluxed for 12h, followed by removal  
 200 of the tetrahydrofuran under reduced pressure. The residue was dissolved in diethyl ether,  
 201 filtered, and washed with DI water. The organic layer was dried over Na<sub>2</sub>SO<sub>4</sub>, filtered and  
 202 concentrated after which the raw product was purified with column chromatography with  
 203 dichloromethane and hexane (1:2). Yield: 1.71 g (8.90 mmol) *S*-(2-(2-ethoxyethoxy)ethyl)  
 204 ethanethioate (89.0 % yield). <sup>1</sup>H NMR (400 MHz, Chloroform-*d*) δ 3.66 – 3.59 (m, 6H), 3.54  
 205 (t, *J* = 7.0 Hz, 2H), 3.12 (t, *J* = 6.5 Hz, 2H), 2.36 (s, 3H), 1.24 (t, *J* = 7.0 Hz, 3H). <sup>13</sup>C NMR  
 206 (100 MHz, Chloroform-*d*) δ 195.54, 70.35, 69.76, 69.73, 66.67, 30.55, 28.79, 15.14. HRMS  
 207 (ESI+): *m/z* calc for C<sub>8</sub>H<sub>16</sub>O<sub>3</sub>S [M+H]<sup>+</sup> 193.0893, found 193.0890.

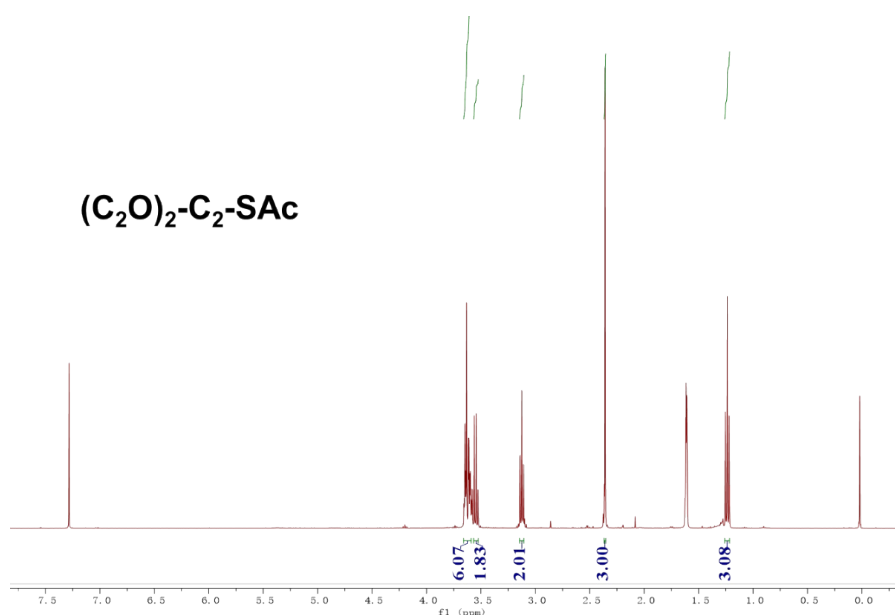

208  
 209 **Fig. S24.** The <sup>1</sup>H-NMR spectrum of compound (C<sub>2</sub>O)<sub>2</sub>-C<sub>2</sub>-SAc.

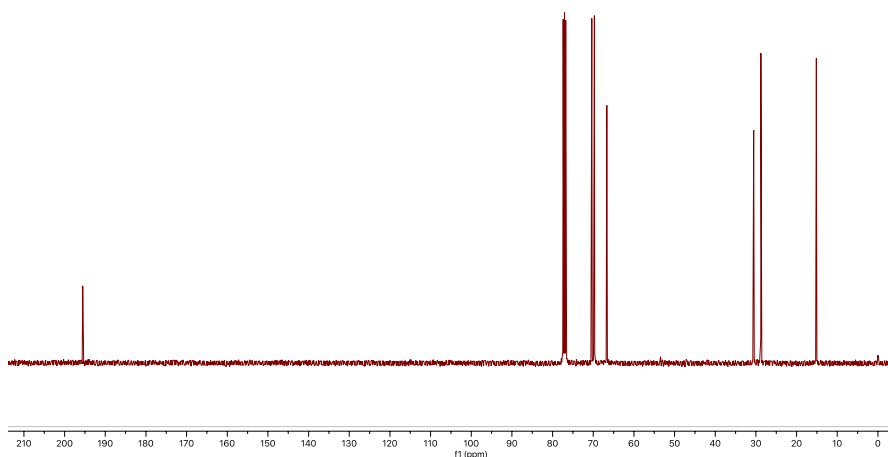

210

211 **Fig. S25.** The  $^{13}\text{C}$ -NMR spectrum of compound  $(\text{C}_2\text{O})_2\text{-C}_2\text{-SAc}$ .

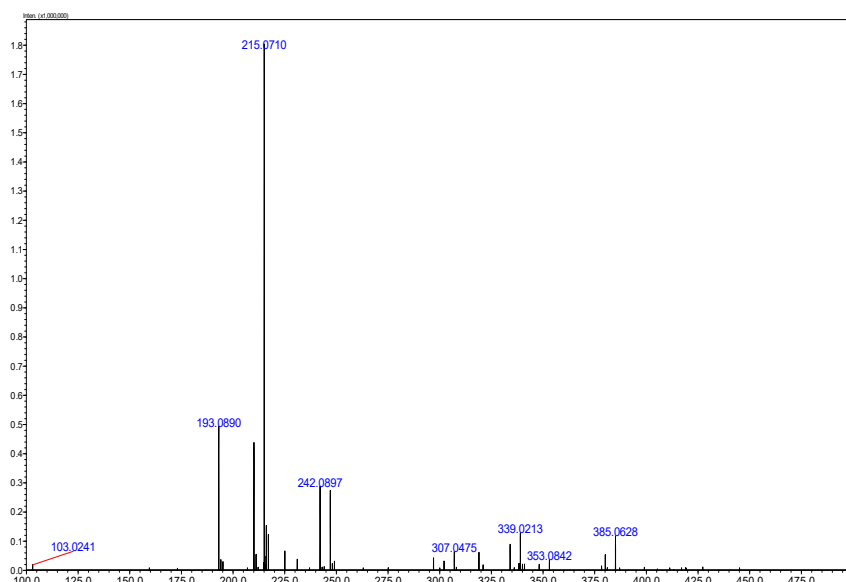

212

213 **Fig. S26.** The HRMS spectrum of compound  $(\text{C}_2\text{O})_2\text{-C}_2\text{-SAc}$ .

214

215 **2-(2-ethoxyethoxy)ethane-1-thiol ( $\text{HS-(C}_2\text{O)}_2\text{-C}_2$ )** was prepared as follows. *S*-(2-(2-  
 216 ethoxyethoxy)ethyl) ethanethioate (1.05 g, 7.00 mmol) was dissolved in 50 mL methanol and  
 217 degassed for 20 min. Subsequently, 4.0 mL trifluoroacetic acid was added. The solution was  
 218 refluxed for 5h then cooled down to room temperature. The solvent was removed by rotary  
 219 evaporator; DCM was used to extract the product. The organic layer was washed with DI water  
 220 3 times before dried over anhydrous  $\text{Na}_2\text{SO}_4$ . After filtration and concentration, the raw product  
 221 was purified by column chromatography with dichloromethane and hexane (1: 2) as eluent.

Yield: 18 % (0.19 g, 1.26 mmol).  $^1\text{H}$  NMR (400 MHz, Chloroform-*d*)  $\delta$  3.67 – 3.61 (m, 6H),  
 3.56 (q,  $J$  = 7.0 Hz, 2H), 2.73 (q,  $J$  = 8.2, 6.5 Hz, 2H), 1.24 (t,  $J$  = 7.0 Hz, 3H).  $^{13}\text{C}$  NMR (100  
 MHz, Chloroform-*d*)  $\delta$  72.93, 70.31, 69.74, 66.67, 24.22, 15.15. HRMS (ESI+):  $m/z$  calc for  
 $\text{C}_6\text{H}_{14}\text{O}_2\text{S}$   $[\text{M}+\text{H}]^+$  149.0636, found 149.0643.

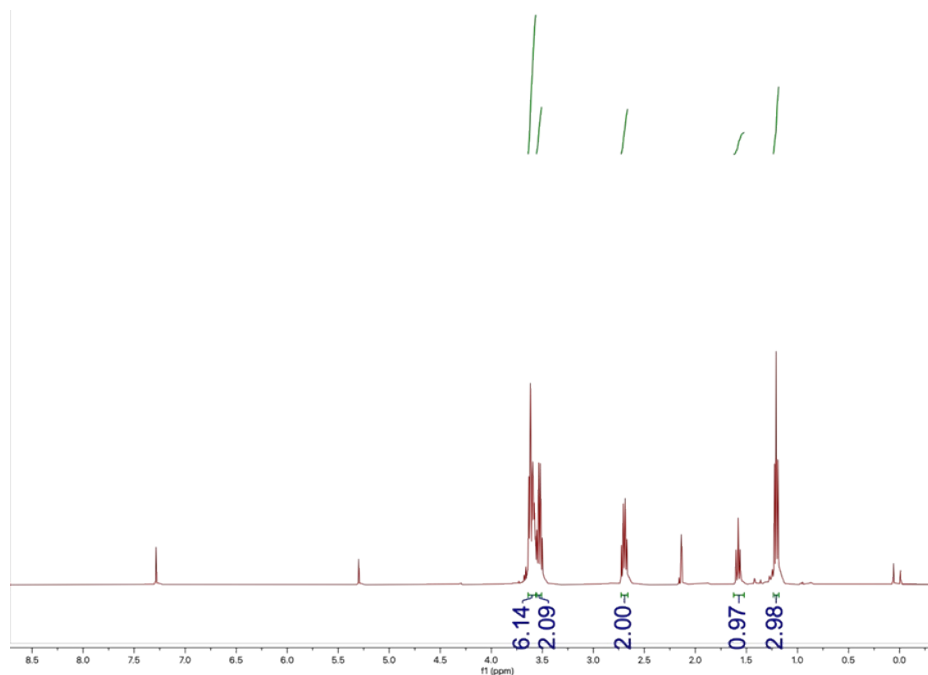

**Fig. S27.** The  $^1\text{H}$ -NMR spectrum of compound HS-(C<sub>2</sub>O)<sub>2</sub>-C<sub>2</sub>.

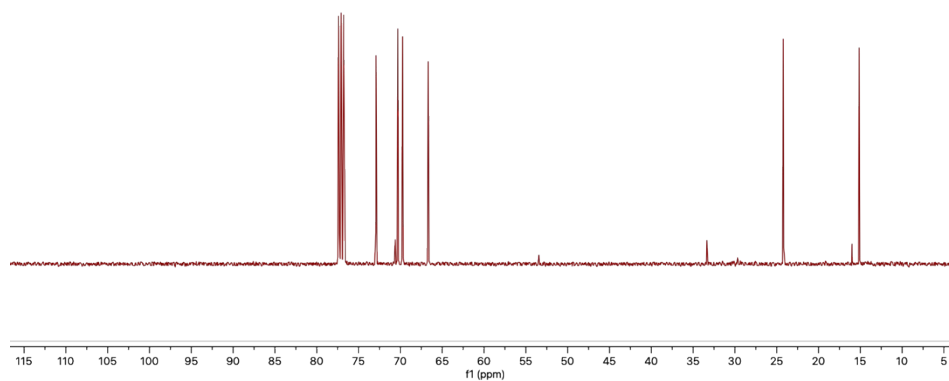

**Fig. S28.** The  $^{13}\text{C}$ -NMR spectrum of compound HS-(C<sub>2</sub>O)<sub>2</sub>-C<sub>2</sub>.

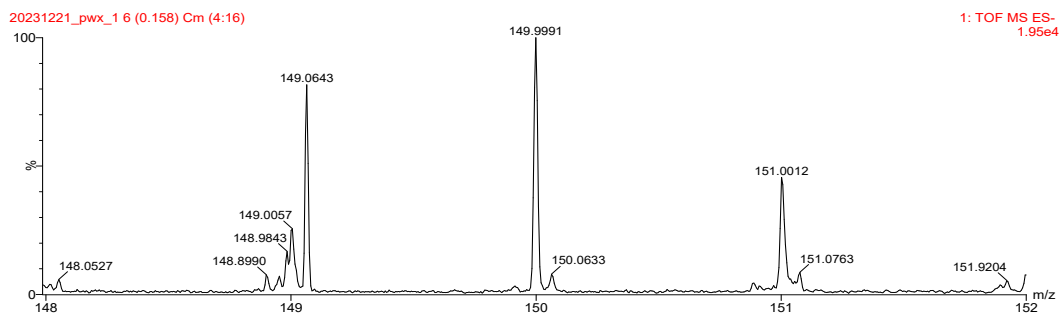

**Fig. S29.** The HRMS spectrum of compound HS-(C<sub>2</sub>O)<sub>2</sub>-C<sub>2</sub>.

**2-(2-(2-ethoxyethoxy)ethoxy)ethyl 4-methylbenzenesulfonate ((C<sub>2</sub>O)<sub>3</sub>-C<sub>2</sub>-OTs)** was prepared as follows.[3] In a 250 mL round-bottomed flask, triethylene glycol monoethyl ether (5.00 mL, 28.60 mmol) was dissolved in triethylamine (20 mL, 144.00 mmol), and the mixture was cooled to 0 °C. After addition of *para*-toluenesulfonyl chloride (6.00 g, 31.40 mmol), the mixture was allowed to warm slowly to room temperature and stirred for further 5 h. Subsequently, the reaction mixture was carefully added to a stirred mixture of concentrated hydrochloric acid (30 mL) and crushed ice (40 g). The mixture was extracted three times with diethyl ether (100 mL), and the combined organic phases were washed successively with brine (100 mL) and a saturated solution of sodium hydrogen carbonate. The organic phases were dried with MgSO<sub>4</sub> and filtered, and the solvents were removed under reduced pressure. Clear, colorless oil. Yield: 8.54 g (90 %). <sup>1</sup>H NMR (400 MHz, Chloroform-*d*) δ 7.84 – 7.81 (m, 2H), 7.36 (d, *J* = 8.1 Hz, 2H), 4.21 – 4.17 (m, 2H), 3.71 (dd, *J* = 5.6, 4.2 Hz, 2H), 3.65 – 3.57 (m, 8H), 3.54 (q, *J* = 7.0 Hz, 2H), 2.47 (s, 3H), 1.23 (t, *J* = 7.0 Hz, 3H).

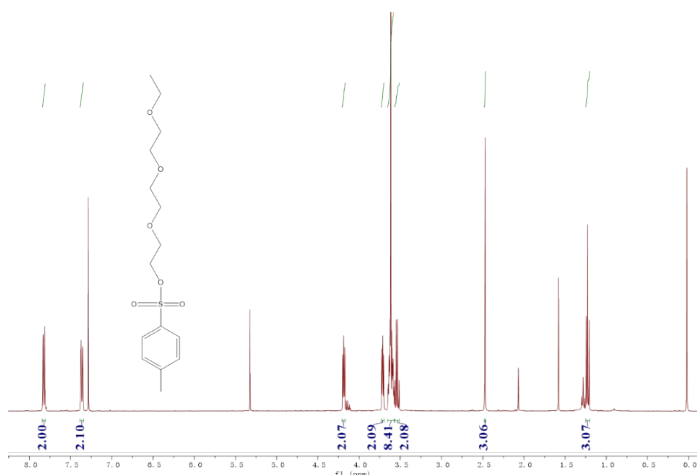

248 **Fig. S30.** The  $^1\text{H}$ -NMR spectrum of compound  $(\text{C}_2\text{O})_3\text{-C}_2\text{-OTs}$ .

249

250 ***S*-(2-(2-(2-ethoxyethoxy)ethoxy)ethyl) ethanethioate** ( $(\text{C}_2\text{O})_3\text{-C}_2\text{-SAc}$ ) was prepared as  
251 follows.[4] 2-(2-(2-ethoxyethoxy)ethoxy)ethyl 4-methylbenzenesulfonate (3.32 g, 10.00  
252 mmol) and potassium thioacetate (4.56 g, 40.00 mmol) were added into 300 mL  
253 tetrahydrofuran, refluxed for 12h, followed by removal of the tetrahydrofuran under reduced  
254 pressure. The residue was dissolved in diethyl ether, filtered, and washed with DI water. The  
255 organic layer was dried over  $\text{Na}_2\text{SO}_4$ , filtered and concentrated after which the raw product  
256 was purified with column chromatography with dichloromethane and hexane (1:2). Yield: 2.10  
257 g (8.90 mmol) *S*-(2-(2-(2-ethoxyethoxy)ethoxy)ethyl) ethanethioate (89.0 % yield).  $^1\text{H}$  NMR  
258 (400 MHz, Chloroform-*d*)  $\delta$  3.69 – 3.60 (m, 10H), 3.55 (q,  $J = 7.0$  Hz, 2H), 3.12 (t,  $J = 6.5$  Hz,  
259 2H), 2.36 (s, 3H), 1.23 (t,  $J = 7.0$  Hz, 3H).  $^{13}\text{C}$  NMR (100 MHz, Chloroform-*d*)  $\delta$  195.42, 70.69,  
260 70.51, 70.31, 69.79, 69.73, 66.59, 30.50, 28.82, 15.12. HRMS (ESI $^+$ ):  $m/z$  calc for  $\text{C}_{10}\text{H}_{20}\text{O}_4\text{S}$   
261  $[\text{M}+\text{H}]^+$  237.1155 found 237.1154.

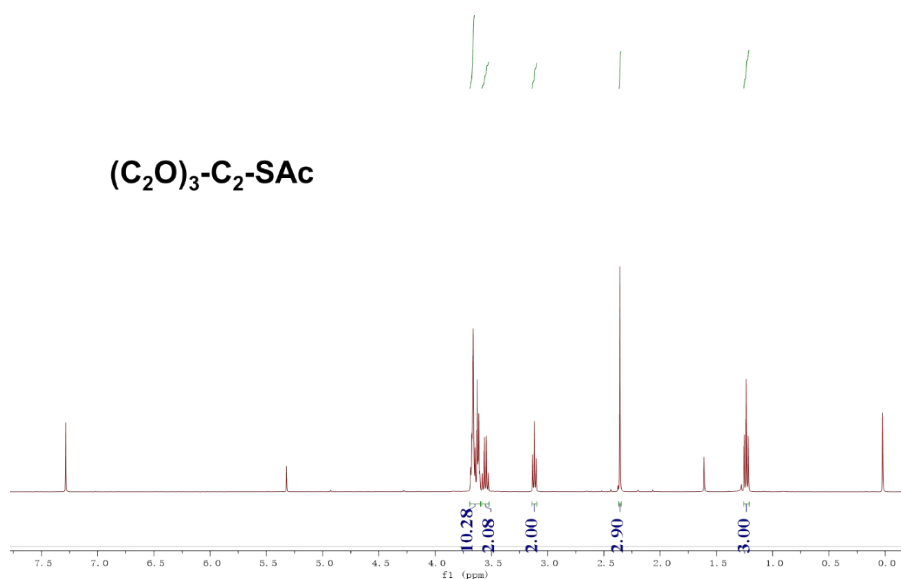

263 **Fig. S31.** The  $^1\text{H}$ -NMR spectrum of compound  $(\text{C}_2\text{O})_3\text{-C}_2\text{-SAc}$ .

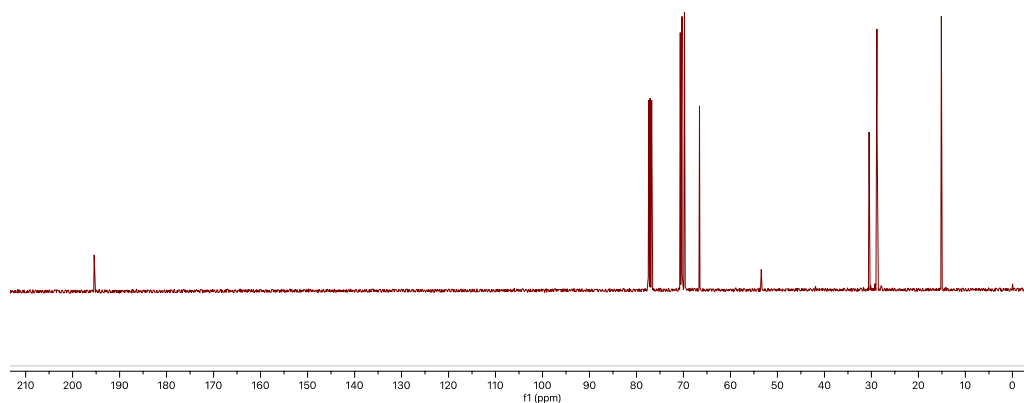

**Fig. S32.** The  $^{13}\text{C}$ -NMR spectrum of compound  $(\text{C}_2\text{O})_3\text{-C}_2\text{-SAc}$ .

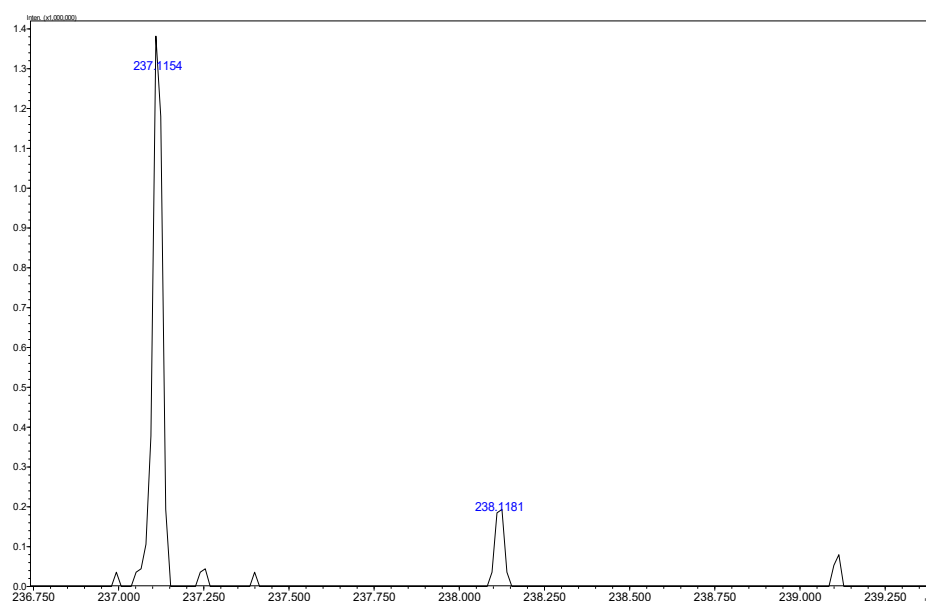

**Fig. S33.** The HRMS spectrum of compound  $(\text{C}_2\text{O})_3\text{-C}_2\text{-SAc}$ .

**2-(2-(2-ethoxyethoxy)ethoxy)ethane-1-thiol ( $\text{HS-(C}_2\text{O)}_3\text{-C}_2$ )** was prepared as follows.[5] *S*-(2-(2-(2-ethoxyethoxy)ethoxy)ethyl) ethanethioate (1.00 g, 4.24 mmol) was dissolved in dry THF (50 mL) and added dropwise to a stirring slurry of  $\text{LiAlH}_4$  (0.64 g; 16.96 mmol) in THF (16.96 mL) at 0 °C. The reaction was stirred at room temperature for 6 h under nitrogen. The reaction was then quenched at 0 °C with water (25 mL, previously degassed), and was acidified



274 with 1 M HCl solution (previously degassed). The mixture was then extracted with Et<sub>2</sub>O  
 275 (3 × 100 mL). The combined organic phases were washed with water (1 × 100 mL) and brine  
 276 (1 × 100 mL), dried over MgSO<sub>4</sub>, filtered, and evaporated to dryness. The crude thiol product  
 277 was purified by column chromatography on silica gel (hexanes). Yield: 0.76 g (3.90 mmol) 2-  
 278 (2-(2-ethoxyethoxy)ethoxy)ethane-1-thiol (92.0 % yield). <sup>1</sup>H NMR (400 MHz, Chloroform-*d*)  
 279 δ 3.69 – 3.60 (m, 10H), 3.54 (q, *J* = 7.0 Hz, 2H), 2.71 (dt, *J* = 8.2, 6.4 Hz, 2H), 1.60 (t, *J* = 8.2  
 280 Hz, 1H), 1.22 (t, *J* = 7.0 Hz, 3H). <sup>13</sup>C NMR (100 MHz, Chloroform-*d*) δ 72.74, 70.58, 70.42,  
 281 70.10, 69.72, 66.44, 24.14, 15.08. HRMS (ESI<sup>+</sup>): *m/z* calc for C<sub>8</sub>H<sub>19</sub>O<sub>3</sub>S [M+H]<sup>+</sup> 195.1055,  
 282 found 195.1054.

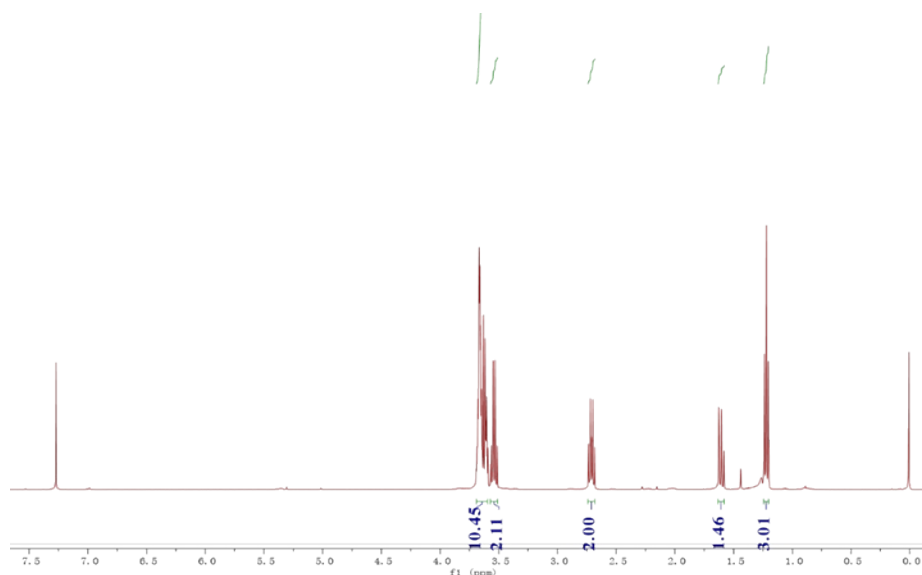

283

284 **Fig. S34.** The <sup>1</sup>H-NMR spectrum of compound HS-(C<sub>2</sub>O)<sub>3</sub>-C<sub>2</sub>.

285

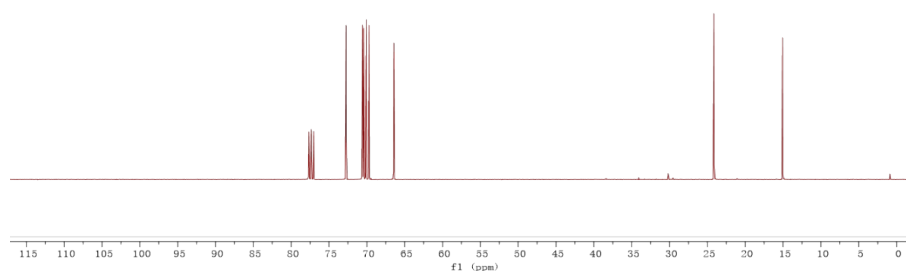

286

287 **Fig. S35.** The <sup>13</sup>C-NMR spectrum of compound HS-(C<sub>2</sub>O)<sub>3</sub>-C<sub>2</sub>.

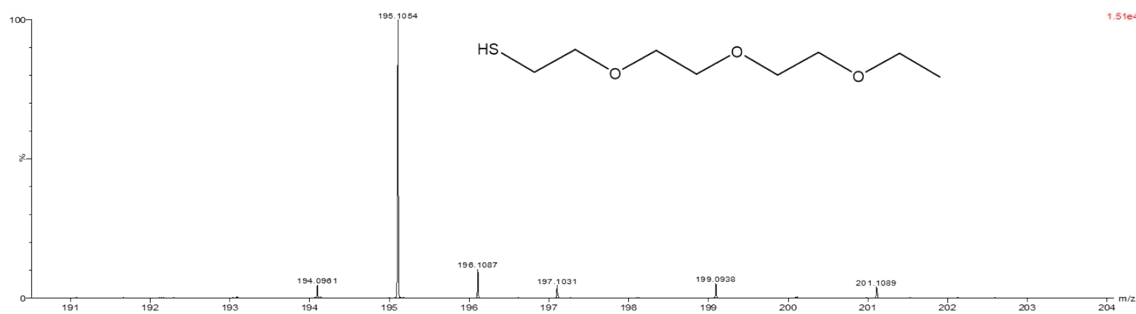

**Fig. S36.** The HRMS spectrum of compound HS-(C<sub>2</sub>O)<sub>3</sub>-C<sub>2</sub>.

**3,6,9,12-tetraoxatetradecan-1-ol ((C<sub>2</sub>O)<sub>4</sub>-C<sub>2</sub>-OH)** was prepared as follows[6]. A suspension of 60% NaH in mineral oil (1 g, 25.23 mmol) was washed with anhydrous hexane (10 mL) and suspended in freshly distilled THF (30 mL). Then, tetraethylene glycol (4 mL, 22.94 mmol) was added to the above suspension and the reaction mixture was refluxed for 1 h. After the mixture was cooled to 0 °C using an ice bath, bromoethane (0.88 mL, 11.47 mmol) was added slowly, and the reaction mixture was kept at 0 °C for 1 h. The solvent was evaporated under a vacuum, ice water was added, and then, the aqueous solution was extracted twice with CHCl<sub>3</sub>. The combined extract was washed with brine, dried over anhydrous Na<sub>2</sub>SO<sub>4</sub>, and concentrated to yield the crude compound. After silica gel chromatography (4% CH<sub>3</sub>OH in CHCl<sub>3</sub> as eluting solvent), 3,6,9,12-tetraoxatetradecan-1-ol was obtained (650 mg, as a colorless oil, 25.5% yield). <sup>1</sup>H NMR (400 MHz, Chloroform-*d*) δ 3.74 – 3.57 (m, 16H), 3.52 (q, *J* = 7.0 Hz, 2H), 1.21 (t, *J* = 7.0 Hz, 3H).

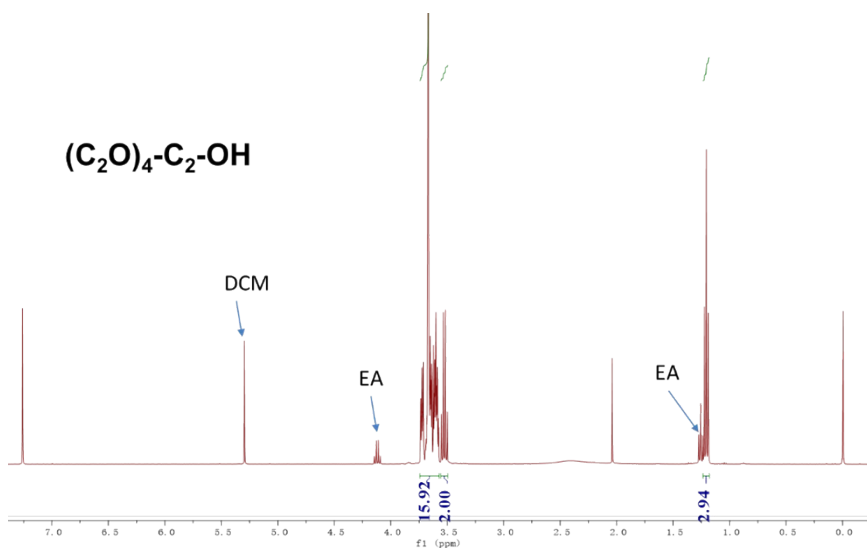

**Fig. S37.** The <sup>1</sup>H-NMR spectrum of compound (C<sub>2</sub>O)<sub>4</sub>-C<sub>2</sub>-OH.

305

306 **3,6,9,12-tetraoxatetradecyl 4-methylbenzenesulfonate ((C<sub>2</sub>O)<sub>4</sub>-C<sub>2</sub>-OTs)** was prepared as  
307 follows.[3] In a 250 mL round-bottomed flask, 3,6,9,12-tetraoxatetradecan-1-ol (18.00 g,  
308 81.01 mmol) was dissolved in triethylamine (56.64 mL, 407.52 mmol), and the mixture was  
309 cooled to 0 °C. After addition of *para*-toluenesulfonyl chloride (16.98 g, 88.86 mmol), the  
310 mixture was allowed to warm slowly to room temperature and stirred for further 5 h.  
311 Subsequently, the reaction mixture was carefully added to a stirred mixture of concentrated  
312 hydrochloric acid (50 mL) and crushed ice (80 g). The mixture was extracted three times with  
313 diethyl ether (200 mL), and the combined organic phases were washed successively with  
314 brine (200 mL) and a saturated solution of sodium hydrogen carbonate. The organic phases  
315 were dried with MgSO<sub>4</sub> and filtered, and the solvents were removed under reduced pressure.  
316 Clear, colorless oil. Yield: 27.4 g (90 %). <sup>1</sup>H NMR (400 MHz, Chloroform-*d*) δ 7.83 – 7.77  
317 (m, 2H), 7.37 – 7.31 (m, 2H), 4.18 – 4.14 (m, 2H), 3.70 – 3.67 (m, 2H), 3.65 – 3.57 (m, 12H),  
318 3.55 – 3.49 (m, 2H), 2.45 (s, 3H), 1.20 (t, *J* = 7.0 Hz, 3H).

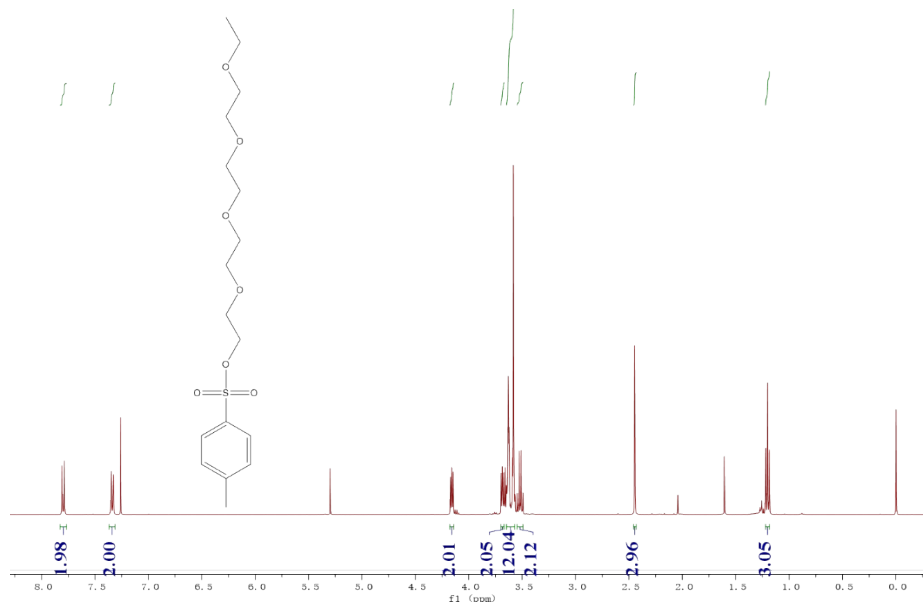

319

320 **Fig. S38.** The <sup>1</sup>H-NMR spectrum of compound (C<sub>2</sub>O)<sub>4</sub>-C<sub>2</sub>-OTs.

321

322 ***S*-(3,6,9,12-tetraoxatetradecyl) ethanethioate ((C<sub>2</sub>O)<sub>4</sub>-C<sub>2</sub>-SAc)** was prepared as follows.[4]  
323 3,6,9,12-tetraoxatetradecyl 4-methylbenzenesulfonate (10.00 g, 26.60 mmol) and potassium  
324 thioacetate (12.13 g, 106.40 mmol) were added into 400 mL tetrahydrofuran, refluxed for 12h,

325 followed by removal of the tetrahydrofuran under reduced pressure. The residue was dissolved  
 326 in diethyl ether, filtered, and washed with DI water. The organic layer was dried over Na<sub>2</sub>SO<sub>4</sub>,  
 327 filtered and concentrated after which the raw product was purified with column  
 328 chromatography with dichloromethane and hexane (1:2). Yield: 6.63 g (23.67 mmol) *S*-  
 329 (3,6,9,12-tetraoxatetradecyl) ethanethioate (89.0 % yield). <sup>1</sup>H NMR (400 MHz, Chloroform-*d*)  
 330 δ 3.66 – 3.57 (m, 14H), 3.53 (q, *J* = 7.0 Hz, 2H), 3.09 (t, *J* = 6.5 Hz, 2H), 2.33 (s, 3H), 1.21 (t,  
 331 *J* = 7.0 Hz, 3H). <sup>13</sup>C NMR (100 MHz, Chloroform-*d*) δ 195.38, 70.64, 70.61, 70.57, 70.48,  
 332 70.29, 69.79, 69.72, 66.56, 30.49, 28.81, 15.12. HRMS (ESI<sup>+</sup>): *m/z* calc for C<sub>12</sub>H<sub>24</sub>O<sub>5</sub>S [M+H]  
 333 <sup>+</sup> 281.1417, found 281.1417.

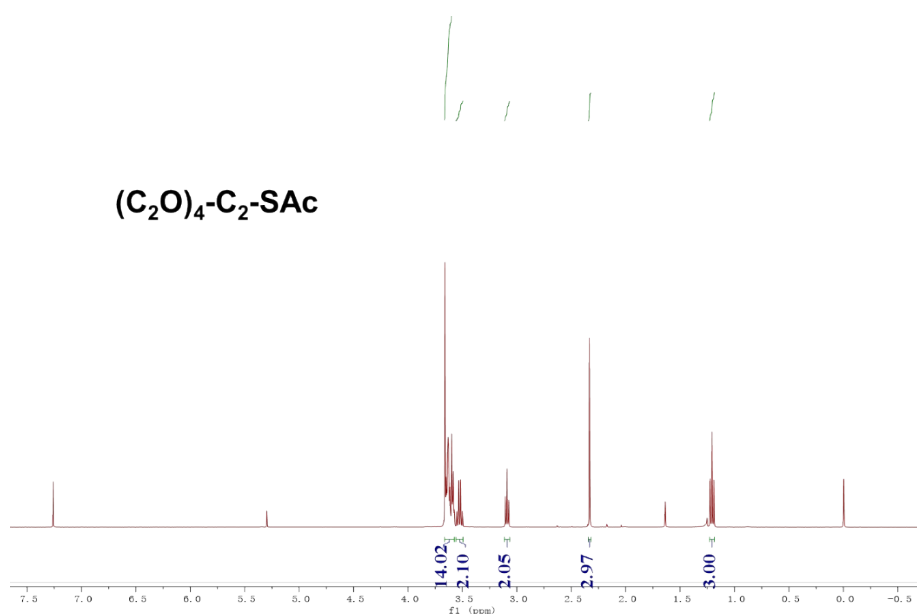

335  
 336 **Fig. S39.** The <sup>1</sup>H-NMR spectrum of compound (C<sub>2</sub>O)<sub>4</sub>-C<sub>2</sub>-SAc.

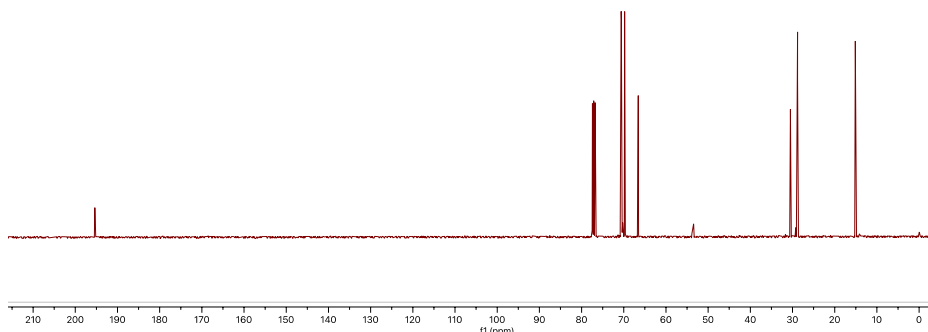

337

338 **Fig. S40.** The  $^{13}\text{C}$ -NMR spectrum of compound  $(\text{C}_2\text{O})_4\text{-C}_2\text{-SAc}$ .

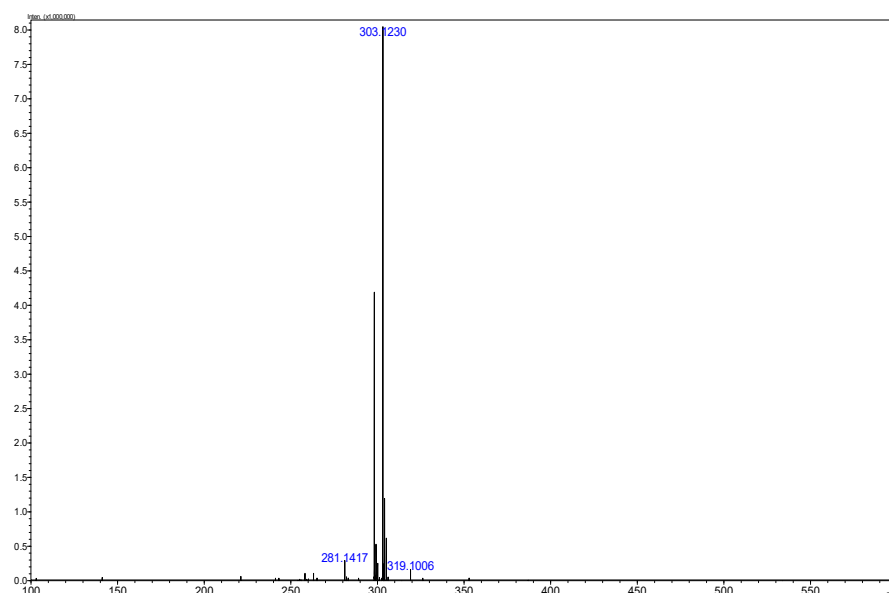

339

340 **Fig. S41.** The HRMS spectrum of compound  $(\text{C}_2\text{O})_4\text{-C}_2\text{-SAc}$ .

341

342 **3,6,9,12-tetraoxatetradecane-1-thiol** ( $\text{HS-(C}_2\text{O)}_4\text{-C}_2$ ) was prepared as follows.[5] *S*-  
 343 (3,6,9,12-tetraoxatetradecyl) ethanethioate (1.00 g, 3.57 mmol) was dissolved in dry THF  
 344 (40 mL) and added dropwise to a stirring slurry of  $\text{LiAlH}_4$  (0.54 g; 14.28 mmol) in THF  
 345 (14.3 mL) at 0 °C. The reaction was stirred at room temperature for 6 h under nitrogen. The  
 346 reaction was then quenched at 0 °C with water (25 mL, previously degassed), and was acidified  
 347 with 1 M HCl solution (previously degassed). The mixture was then extracted with  $\text{Et}_2\text{O}$   
 348 ( $3 \times 100$  mL). The combined organic phases were washed with water ( $1 \times 100$  mL) and brine

(1 × 100 mL), dried over MgSO<sub>4</sub>, filtered, and evaporated to dryness. The crude thiol product was purified by column chromatography on silica gel (hexanes). Yield: 0.78 g (3.28 mmol) 3,6,9,12-tetraoxatetradecane-1-thiol (92.0 % yield). <sup>1</sup>H NMR (400 MHz, Chloroform-*d*) δ 3.71 – 3.60 (m, 14H), 3.58 – 3.52 (m, 2H), 2.72 (dt, *J* = 8.3, 6.5 Hz, 2H), 1.23 (t, *J* = 7.0 Hz, 3H). <sup>13</sup>C NMR (100 MHz, Chloroform-*d*) δ 72.76, 70.57, 70.53, 70.51, 70.43, 70.12, 69.73, 66.46, 24.16, 15.10. HRMS (ESI<sup>+</sup>): *m/z* calc for C<sub>10</sub>H<sub>23</sub>O<sub>4</sub>S [M+H]<sup>+</sup> 239.1317, found 239.1325.

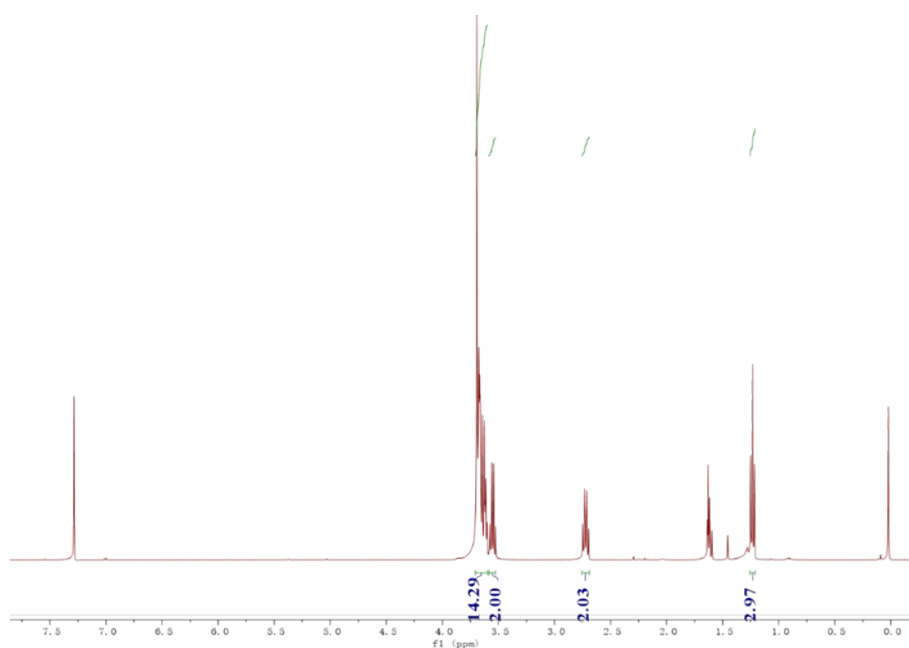

**Fig. S42.** The <sup>1</sup>H-NMR spectrum of compound HS-(C<sub>2</sub>O)<sub>4</sub>-C<sub>2</sub>.

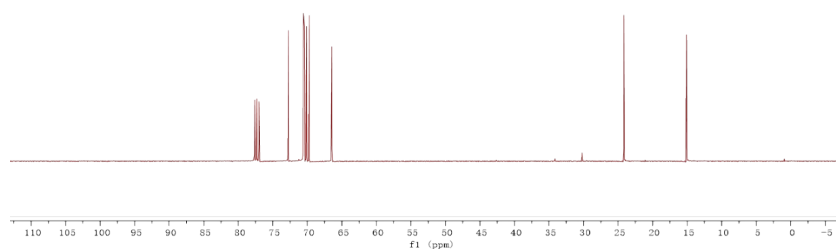

**Fig. S43.** The <sup>13</sup>C-NMR spectrum of compound HS-(C<sub>2</sub>O)<sub>4</sub>-C<sub>2</sub>.

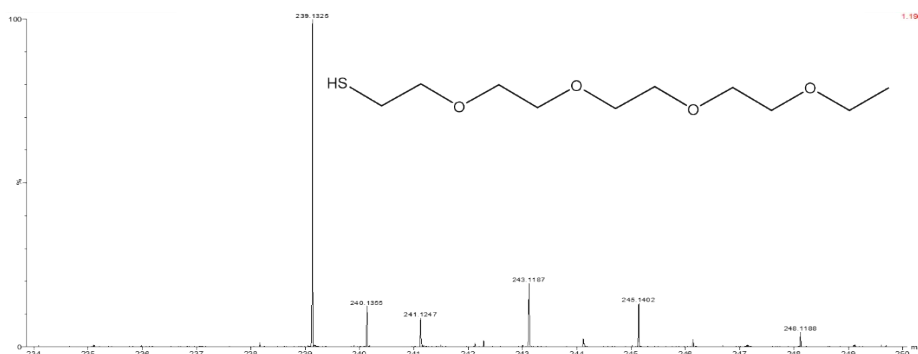

**Fig. S44.** The HRMS spectrum of compound HS-(C<sub>2</sub>O)<sub>4</sub>-C<sub>2</sub>.

**1-iodo-2-(2-iodoethoxy)ethane (I-C<sub>2</sub>O-C<sub>2</sub>-I)** was prepared as follows.[7] To a stirred solution of 2-chloroethyl ether (14.30 g, 100.00 mmol) in acetone (200.00 mL) was added powder NaI (65.00 g, 433.6 mmol). The resulting clear yellow solution was heated as reflux for 48h. Then, cooled, filtered through a plug of celite and concentrated to give yellow liquid. This was taken up in ether (200 mL) washed with water (50 mL) and 10% aq. NaHSO<sub>3</sub> (20 mL), dried (NaHSO<sub>4</sub>), filtered. The crude thiol product was purified by column chromatography on silica gel (hexanes). Yield: 26.65 g (82.00 mmol) 1-iodo-2-(2-iodoethoxy)ethane (82.0 % yield). <sup>1</sup>H NMR (400 MHz, Chloroform-*d*) δ 3.79 (dd, *J* = 7.4, 6.2 Hz, 4H), 3.29 (t, *J* = 6.8 Hz, 4H).

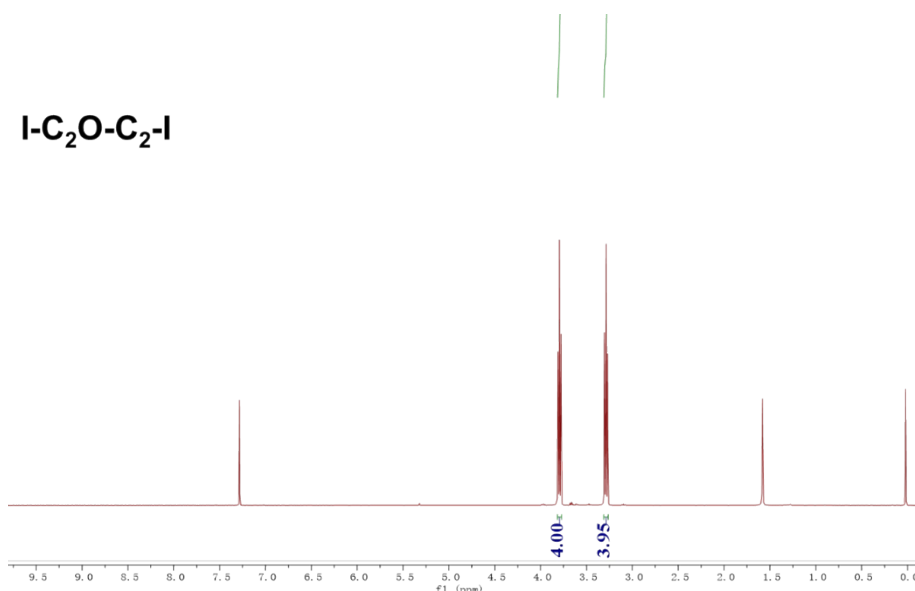

**Fig. S45.** The <sup>1</sup>H-NMR spectrum of compound I-C<sub>2</sub>O-C<sub>2</sub>-I.

**S-(2-(2-iodoethoxy)ethyl) ethanethioate (I-C<sub>2</sub>O-C<sub>2</sub>-SAc)** was prepared as follows similar to the previous work reported.[1] 1-iodo-2-(2-iodoethoxy)ethane (14.80 g, 45.40 mmol) and

potassium thioacetate (1.30 g, 11.34 mmol) were added into 200 mL tetrahydrofuran, stirred for 12h at room temperature, followed by removal of the tetrahydrofuran under reduced pressure. The residue was dissolved in diethyl ether, filtered, and washed with DI water. The organic layer was dried over Na<sub>2</sub>SO<sub>4</sub>, filtered and concentrated after which the raw product was purified with column chromatography with ethyl acetate and hexane (1: 10). Yield: 2.77 g (10.09 mmol) *S*-(2-(2-iodoethoxy)ethyl) ethanethioate (89.0 % yield). <sup>1</sup>H NMR (400 MHz, Chloroform-*d*) δ 3.78 – 3.72 (m, 2H), 3.64 (td, *J* = 6.4, 1.7 Hz, 2H), 3.29 – 3.24 (m, 2H), 3.12 (td, *J* = 6.4, 1.7 Hz, 2H), 2.37 (d, *J* = 1.8 Hz, 3H). <sup>13</sup>C NMR (100 MHz, Chloroform-*d*) δ 195.38, 71.50, 69.29, 30.61, 28.87, 2.70. HRMS (ESI<sup>+</sup>): *m/z* calc for C<sub>6</sub>H<sub>11</sub>O<sub>2</sub>SI [M+H]<sup>+</sup> 274.9603, found 274.9607.

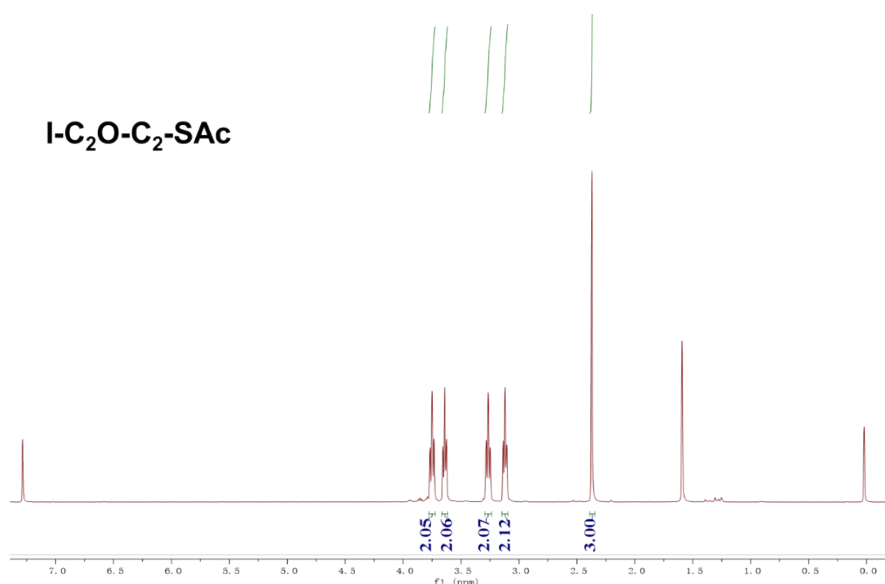

**Fig. S46.** The <sup>1</sup>H-NMR spectrum of compound I-C<sub>2</sub>O-C<sub>2</sub>-SAc.

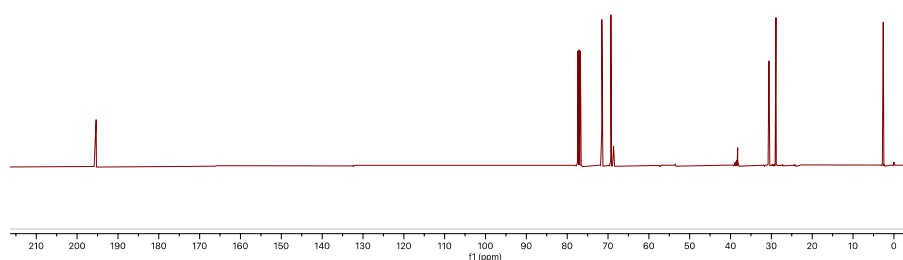

**Fig. S47.** The <sup>13</sup>C NMR spectrum of compound I-C<sub>2</sub>O-C<sub>2</sub>-SAc.



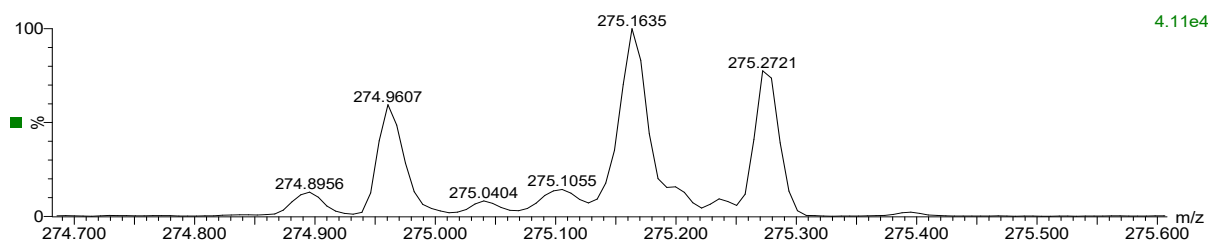

**Fig. S48.** The HRMS spectrum of compound I-C<sub>2</sub>O-C<sub>2</sub>-SAc.

**2-(2-iodoethoxy)ethane-1-thiol (HS-C<sub>2</sub>O-C<sub>2</sub>-I)** was prepared as follows. *S*-(2-(2-iodoethoxy)ethyl) ethanethioate (1.17 g, 4.27 mmol) was dissolved in 50 mL methanol and degassed for 20 min. Subsequently, 3.0 mL trifluoroacetic acid was added. The solution was refluxed for 5h then cooled down to room temperature. The solvent was removed by rotary evaporator; DCM was used to extract the product. The organic layer was washed with DI water 3 times before dried over anhydrous Na<sub>2</sub>SO<sub>4</sub>. After filtration and concentration, the raw product was purified by column chromatography with hexane as eluent. Yield: 18 % (0.18 g, 0.77 mmol). <sup>1</sup>H NMR (400 MHz, Chloroform-*d*) δ 3.75 (t, *J* = 6.7 Hz, 2H), 3.65 (t, *J* = 6.3 Hz, 2H), 3.28 (t, *J* = 6.7 Hz, 2H), 2.72 (q, *J* = 8.2, 6.3 Hz, 2H), 1.66 (t, *J* = 8.2 Hz, 1H). <sup>13</sup>C NMR (100 MHz, Chloroform-*d*) δ 72.32, 71.34, 24.46, 3.21. HRMS (ESI<sup>+</sup>): *m/z* calc for C<sub>4</sub>H<sub>8</sub>OSI [M+H]<sup>+</sup> 230.9341, found 230.9356.

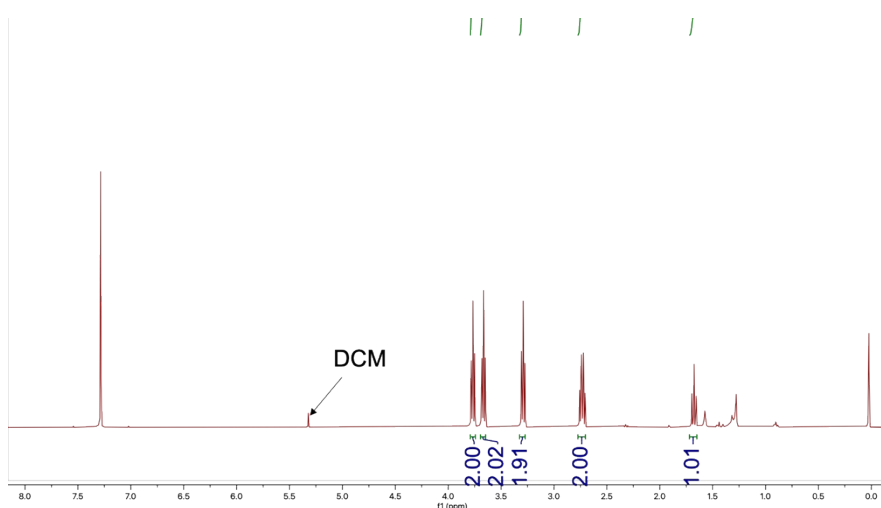

**Fig. S49.** The <sup>1</sup>H-NMR spectrum of compound HS-C<sub>2</sub>O-C<sub>2</sub>-I.

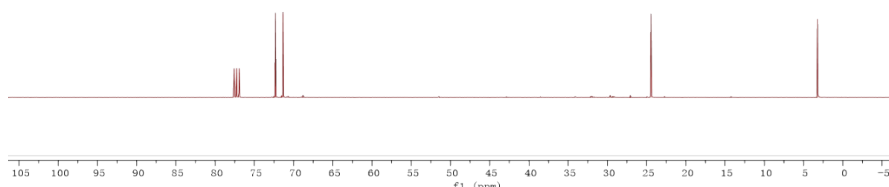

409

410 **Fig. S50.** The  $^{13}\text{C}$ -NMR spectrum of compound HS- $\text{C}_2\text{O}$ - $\text{C}_2$ -I.

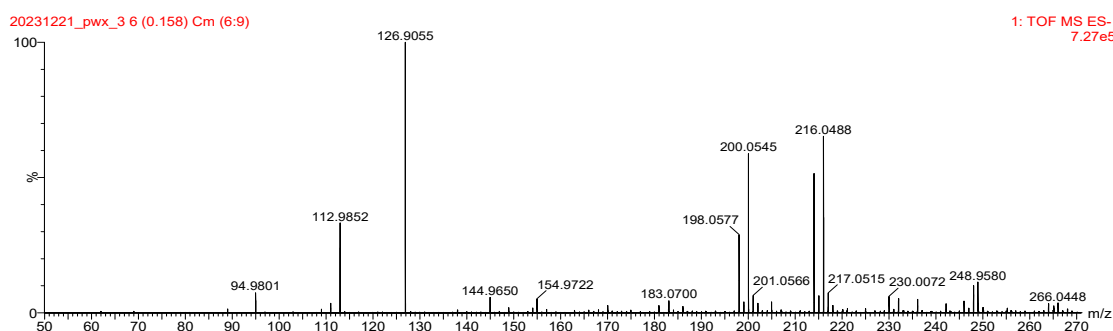

411

412 **Fig. S51.** The HRMS spectrum of compound HS- $\text{C}_2\text{O}$ - $\text{C}_2$ -I.

413

414 **1,2-bis(2-iodoethoxy)ethane (I-( $\text{C}_2\text{O}$ ) $_2$ - $\text{C}_2$ -I)** was prepared as follows.[7] To a stirred solution  
 415 of 1,2-bis(2-chloroethoxy)ethane (18.70 g, 100.00 mmol) in acetone (200.00 mL) was added  
 416 powder NaI (65.00 g, 433.6 mmol). The resulting clear yellow solution was heated as reflux  
 417 for 48h. Then, cooled, filtered through a plug of celite and concentrated to give yellow liquid.  
 418 This was taken up in ether (200 mL) washed with water (50 mL) and 10% aq.  $\text{NaHSO}_3$  (20  
 419 mL), dried ( $\text{NaHSO}_4$ ), filtered. The crude thiol product was purified by column  
 420 chromatography on silica gel (hexanes). Yield: 30.26 g (82.00 mmol) 1,2-bis(2-iodoethoxy)  
 421 ethane (82.0 % yield).  $^1\text{H}$  NMR (400 MHz, Chloroform- $d$ )  $\delta$  3.78 (t,  $J$  = 6.8 Hz, 4H), 3.69 (s,  
 422 4H), 3.28 (t,  $J$  = 6.8 Hz, 4H).

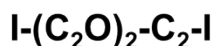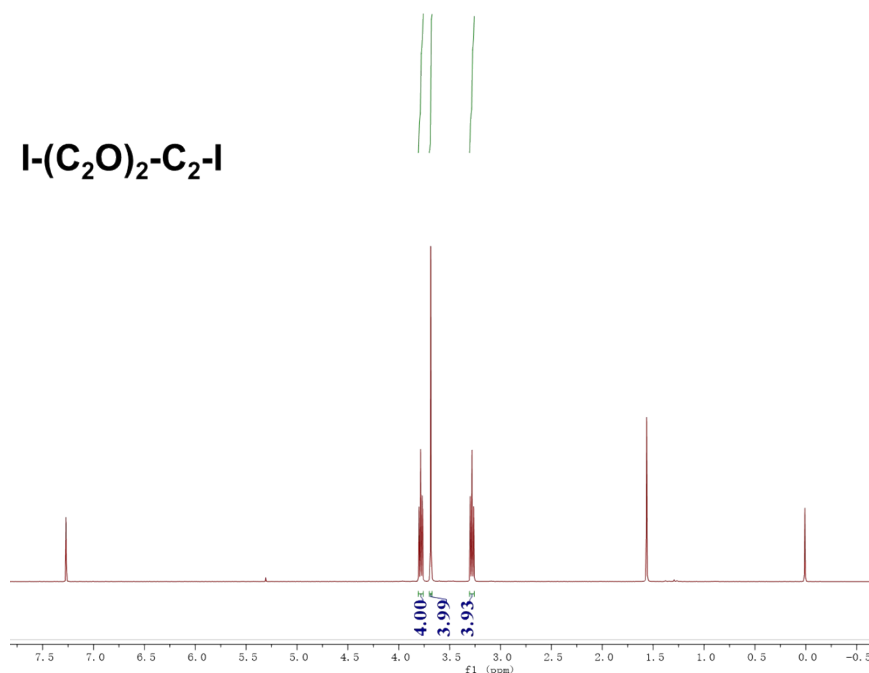

**Fig. S52.** The <sup>1</sup>H-NMR spectrum of compound I-(C<sub>2</sub>O)<sub>2</sub>-C<sub>2</sub>-I.

***S*-(2-(2-(2-iodoethoxy)ethoxy)ethyl) ethanethioate (I-(C<sub>2</sub>O)<sub>2</sub>-C<sub>2</sub>-SAc)** was prepared as follows.[1] 1,2-bis(2-iodoethoxy)ethane (24.62 g, 66.72 mmol) and potassium thioacetate (1.90 g, 16.68 mmol) were added into 200 mL tetrahydrofuran, stirred for 12h at room temperature, followed by removal of the tetrahydrofuran under reduced pressure. The residue was dissolved in diethyl ether, filtered, and washed with DI water. The organic layer was dried over Na<sub>2</sub>SO<sub>4</sub>, filtered and concentrated after which the raw product was purified with column chromatography with dichloromethane and hexane (1: 10). Yield: 4.72 g (14.85 mmol) *S*-(2-(2-(2-iodoethoxy)ethoxy)ethyl) ethanethioate (89.0 % yield). <sup>1</sup>H NMR (400 MHz, Chloroform-*d*) δ 3.78 (t, *J* = 6.9 Hz, 2H), 3.67 (m, *J* = 4.6, 2.8, 1.4 Hz, 4H), 3.65 – 3.62 (m, 2H), 3.29 (t, *J* = 7.3, 6.5 Hz, 2H), 3.12 (t, *J* = 6.4 Hz, 2H), 2.36 (s, 3H). <sup>13</sup>C NMR (100 MHz, Chloroform-*d*) δ 195.42, 72.00, 70.32, 70.14, 69.82, 30.59, 28.86, 2.90. HRMS (ESI<sup>+</sup>): *m/z* calc for C<sub>8</sub>H<sub>15</sub>O<sub>3</sub>SI [M+H]<sup>+</sup> 318.9859, found 318.9850. HRMS (ESI<sup>+</sup>): *m/z* calc for C<sub>8</sub>H<sub>15</sub>O<sub>3</sub>SI [M+H]<sup>+</sup> 318.9859, found 318.9850.

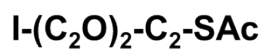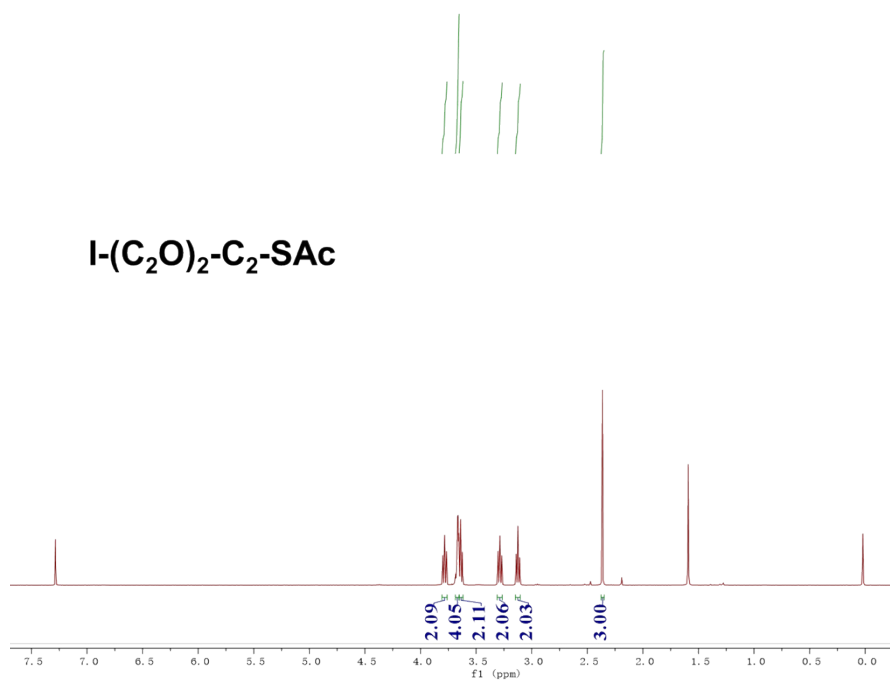

439

440 **Fig. S53.** The <sup>1</sup>H-NMR spectrum of compound I-(C<sub>2</sub>O)<sub>2</sub>-C<sub>2</sub>-SAc.

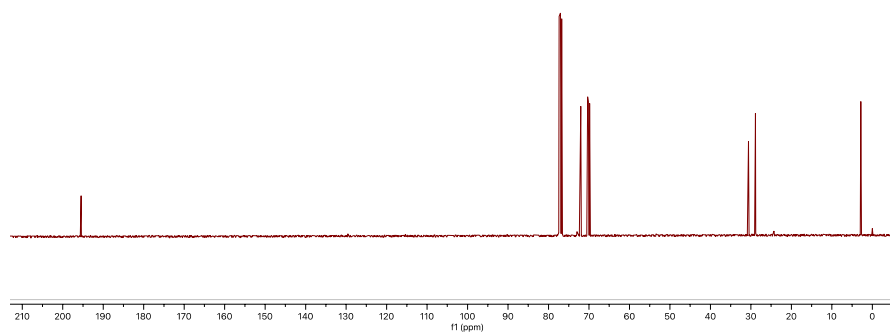

441

442 **Fig. S54.** The <sup>13</sup>C-NMR spectrum of compound I-(C<sub>2</sub>O)<sub>2</sub>-C<sub>2</sub>-SAc.

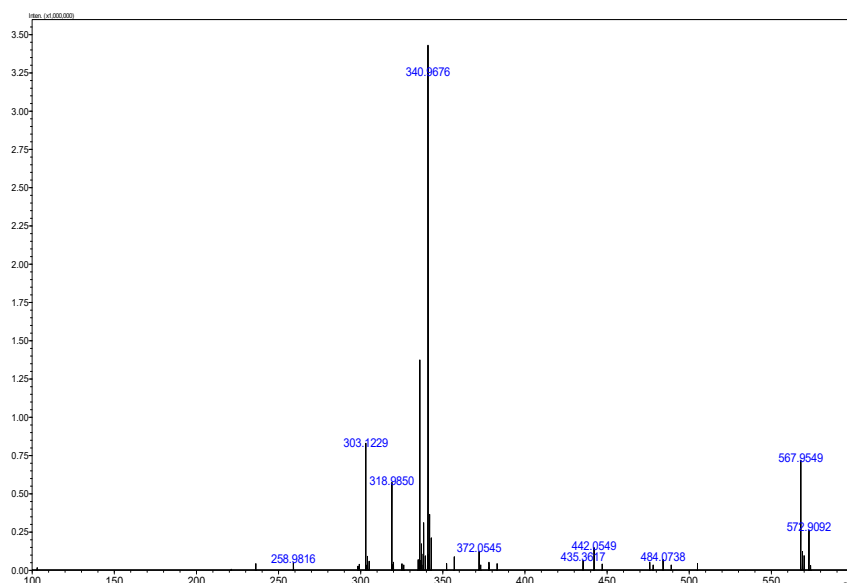

**Fig. S55.** The HRMS spectrum of compound I-(C<sub>2</sub>O)<sub>2</sub>-C<sub>2</sub>-SAc.

**2-(2-(2-iodoethoxy)ethoxy)ethane-1-thiol (HS-(C<sub>2</sub>O)<sub>2</sub>-C<sub>2</sub>-I)** was prepared as follows. *S*-(2-(2-(2-iodoethoxy)ethoxy)ethyl) ethanethioate (0.83 g, 2.61 mmol) was dissolved in 30 mL methanol and degassed for 20 min. Subsequently, 3.0 mL trifluoroacetic acid was added. The solution was refluxed for 5h then cooled down to room temperature. The solvent was removed by rotary evaporator; DCM was used to extract the product. The organic layer was washed with DI water 3 times before dried over anhydrous Na<sub>2</sub>SO<sub>4</sub>. After filtration and concentration, the raw product was purified by column chromatography with hexane as eluent. Yield: 18 % (0.13 g, 0.47 mmol). <sup>1</sup>H NMR (400 MHz, Chloroform-*d*) δ 3.78 (t, *J* = 6.9 Hz, 2H), 3.67 (m, *J* = 5.7, 3.2, 1.5 Hz, 4H), 3.64 (d, *J* = 6.5 Hz, 2H), 3.28 (t, *J* = 6.9 Hz, 2H), 2.72 (q, *J* = 8.2, 6.4 Hz, 2H). <sup>13</sup>C NMR (100 MHz, Chloroform-*d*) δ 72.96, 71.99, 70.23, 70.17, 24.31, 2.92. HRMS (ESI<sup>+</sup>): *m/z* calc for C<sub>6</sub>H<sub>14</sub>O<sub>2</sub>SI [M+H]<sup>+</sup> 276.9759, found 276.9762.

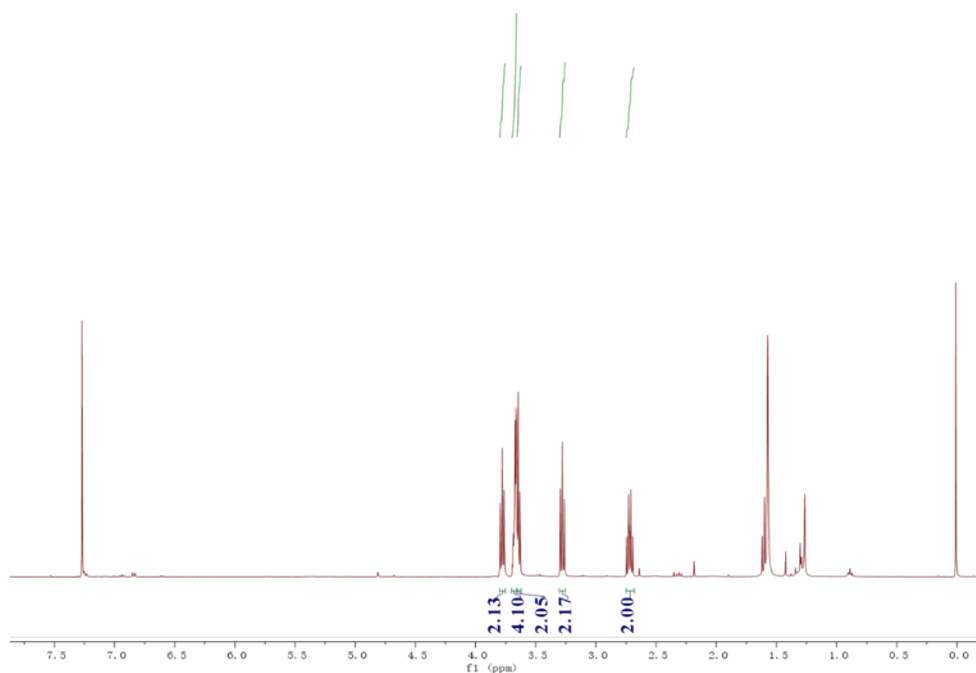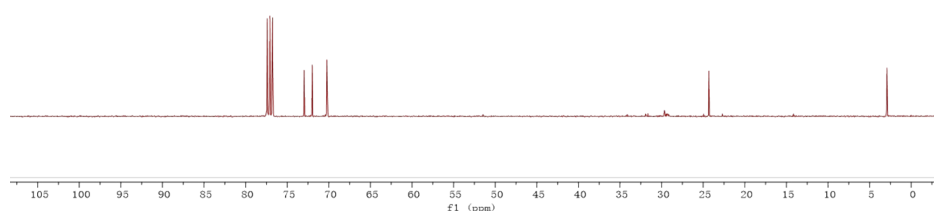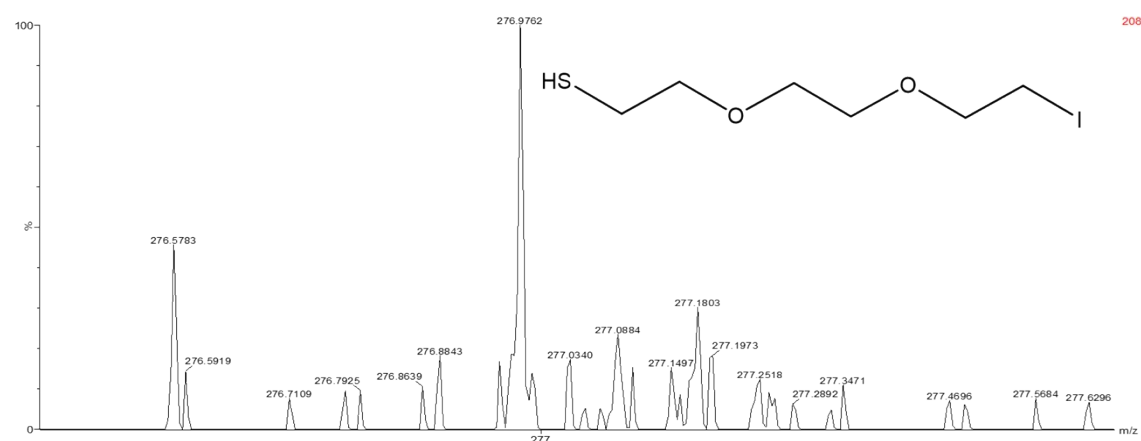

**Fig. S58.** The HRMS spectrum of compound HS-(C<sub>2</sub>O)<sub>2</sub>-C<sub>2</sub>-I.

**1-iodo-2-(2-(2-(2-iodoethoxy)ethoxy)ethoxy)ethane (I-(C<sub>2</sub>O)<sub>3</sub>-C<sub>2</sub>-I)** was prepared as follows.[7] To a stirred solution of 1-chloro-2-(2-(2-(2-chloroethoxy)ethoxy)ethoxy)ethane

466 (10.00 g, 43.29 mmol) in acetone (200.00 mL) was added powder NaI (25.97 g, 173.16 mmol).  
 467 The resulting clear yellow solution was heated as reflux for 48h. Then, cooled, filtered through  
 468 a plug of celite and concentrated to give yellow liquid. This was taken up in ether (200 mL)  
 469 washed with water (50 mL) and 10% aq. NaHSO<sub>3</sub> (20 mL), dried (NaHSO<sub>4</sub>), filtered. The crude  
 470 thiol product was purified by column chromatography on silica gel (hexanes). Yield: 14.70 g,  
 471 35.49 mmol, 82.0 %. <sup>1</sup>H NMR (400 MHz, Chloroform-*d*) δ 3.77 (t, *J* = 6.9 Hz, 4H), 3.68 (s,  
 472 8H), 3.28 (t, *J* = 6.9 Hz, 4H).

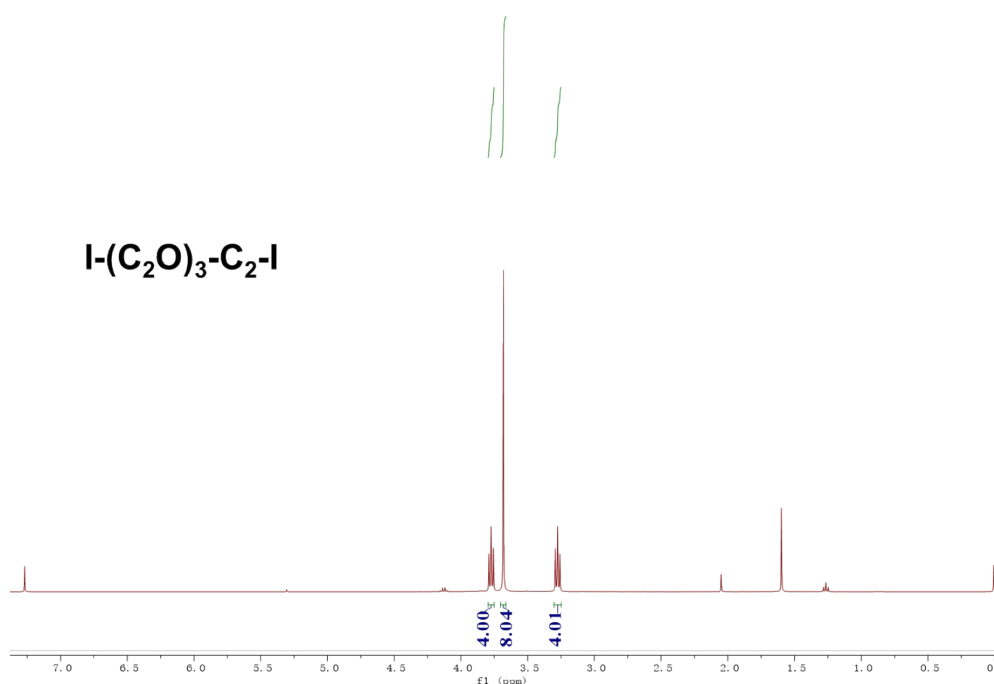

473  
 474 **Fig. S59.** The <sup>1</sup>H-NMR spectrum of compound I-(C<sub>2</sub>O)<sub>3</sub>-C<sub>2</sub>-I.

475  
 476 ***S*-(2-(2-(2-(2-chloroethoxy)ethoxy)ethoxy)ethyl) ethanethioate (I-(C<sub>2</sub>O)<sub>3</sub>-C<sub>2</sub>-SAc)** was  
 477 prepared as follows similar to the previous work reported.[1] 1-iodo-2-(2-(2-(2-  
 478 iodoethoxy)ethoxy)ethoxy)ethane (17.94 g, 43.33 mmol) and potassium thioacetate (1.24 g,  
 479 10.83 mmol) were added into 200 mL tetrahydrofuran, stirred for 12h at room temperature,  
 480 followed by removal of the tetrahydrofuran under reduced pressure. The residue was dissolved  
 481 in diethyl ether, filtered, and washed with DI water. The organic layer was dried over Na<sub>2</sub>SO<sub>4</sub>,  
 482 filtered and concentrated after which the raw product was purified with column  
 483 chromatography with dichloromethane and hexane (1: 10). Yield: 3.49 g (9.64 mmol, 89.0 %  
 484 yield). <sup>1</sup>H NMR (400 MHz, Chloroform-*d*) δ 3.78 (t, *J* = 7.4, 6.5 Hz, 2H), 3.70 – 3.65 (m, 8H),

485 3.64 – 3.61 (m, 2H), 3.29 (t,  $J = 7.3, 6.5$  Hz, 2H), 3.12 (t,  $J = 6.5$  Hz, 2H), 2.36 (s, 3H).  $^{13}\text{C}$   
 486 NMR (100 MHz, Chloroform- $d$ )  $\delta$  195.42, 71.98, 70.65, 70.61, 70.33, 70.25, 69.77, 30.58,  
 487 28.86, 2.97. HRMS (ESI $^{+}$ ):  $m/z$  calc for  $\text{C}_{10}\text{H}_{19}\text{O}_4\text{SI}$   $[\text{M}+\text{Na}]^{+}$  384.9941, found 384.9940.

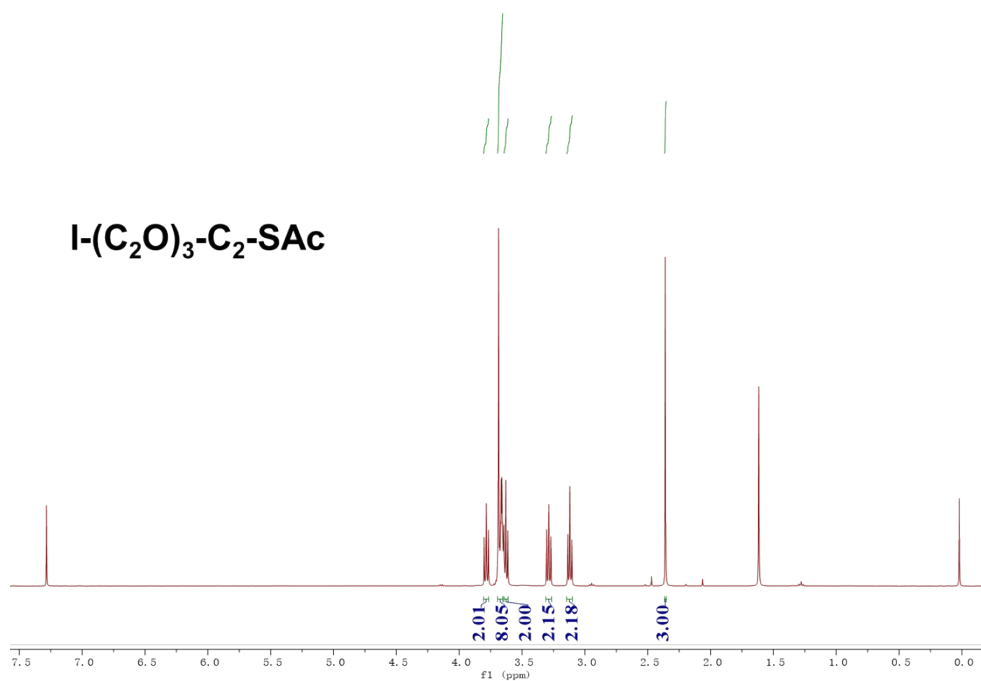

488  
 489 **Fig. S60.** The  $^1\text{H}$ -NMR spectrum of compound I-(C<sub>2</sub>O)<sub>3</sub>-C<sub>2</sub>-SAc.

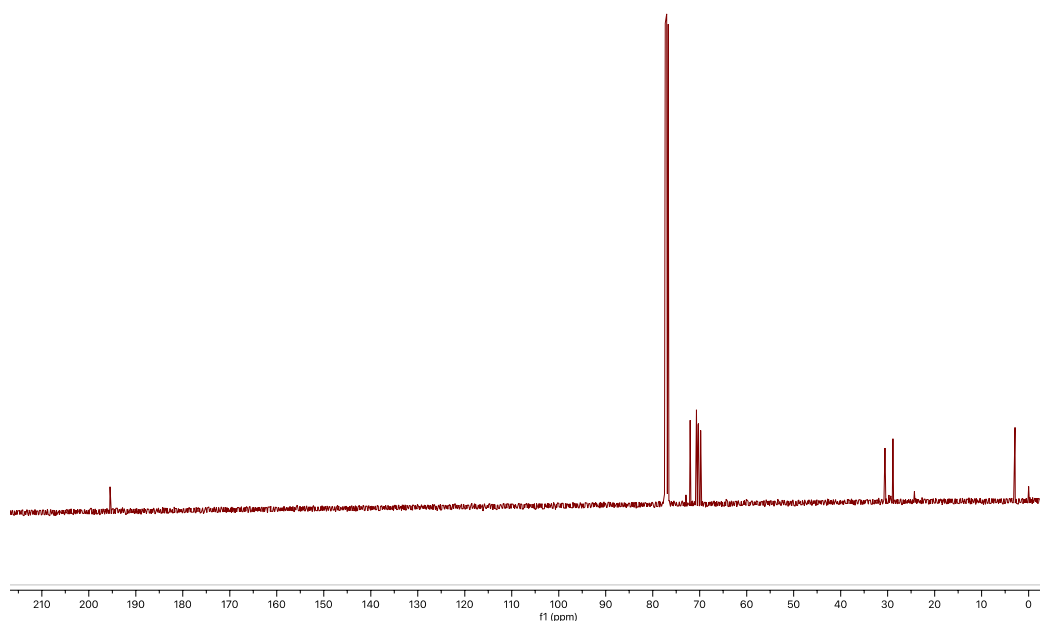

491  
 492 **Fig. S61.** The  $^{13}\text{C}$ -NMR spectrum of compound I-(C<sub>2</sub>O)<sub>3</sub>-C<sub>2</sub>-SAc.



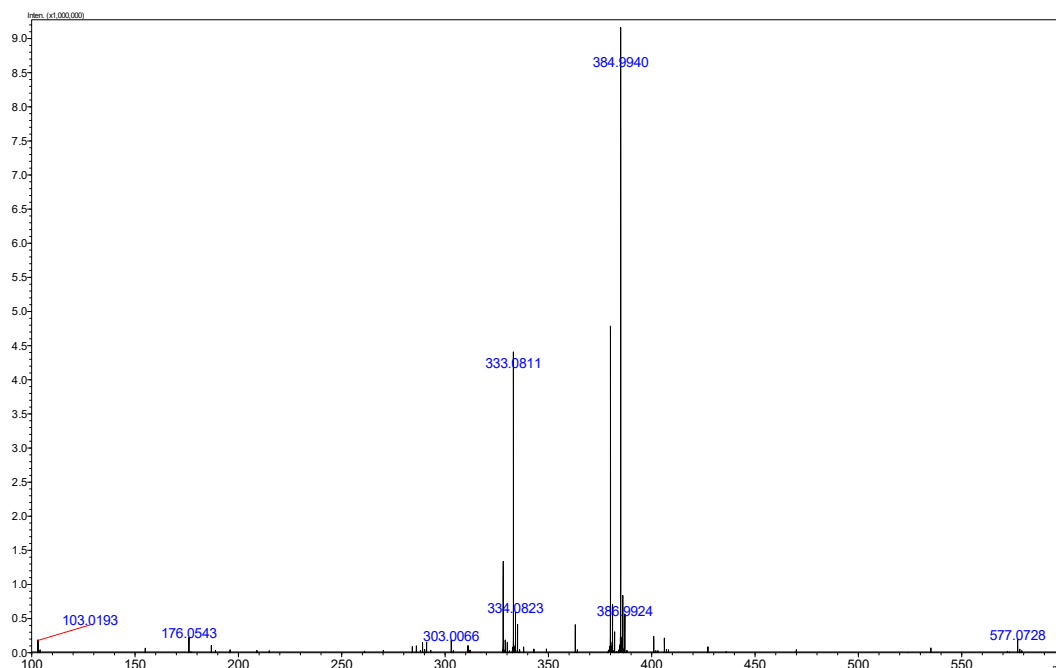

**Fig. S62.** The HRMS spectrum of compound I-(C<sub>2</sub>O)<sub>3</sub>-C<sub>2</sub>-SAc.

**2-(2-(2-(2-iodoethoxy)ethoxy)ethoxy)ethane-1-thiol (I-(C<sub>2</sub>O)<sub>3</sub>-C<sub>2</sub>-SH)** was prepared as follows. *S*-(2-(2-(2-(2-chloroethoxy)ethoxy)ethoxy)ethyl) ethanethioate (1.08 g, 2.98 mmol) was dissolved in 30 mL methanol and degassed for 20 min. Subsequently, 4.0 mL trifluoroacetic acid was added. The solution was refluxed for 5h then cooled down to room temperature. The solvent was removed by rotary evaporator; DCM was used to extract the product. The organic layer was washed with DI water 3 times before dried over anhydrous Na<sub>2</sub>SO<sub>4</sub>. After filtration and concentration, the raw product was purified by column chromatography with hexane as eluent. Yield: 18 % (0.17 g, 0.54 mmol). <sup>1</sup>H NMR (400 MHz, Chloroform-*d*) δ 3.81 – 3.77 (t, 2H), 3.71 – 3.67 (m, 8H), 3.66 – 3.63 (t, 2H), 3.29 (t, *J* = 7.4, 6.4 Hz, 2H), 2.73 (q, *J* = 8.2, 6.4 Hz, 2H). <sup>13</sup>C NMR (100 MHz, Chloroform-*d*) δ 72.91, 72.00, 70.71, 70.67, 70.65, 70.27, 24.32, 2.95. HRMS (ESI<sup>+</sup>): *m/z* calc for C<sub>8</sub>H<sub>18</sub>O<sub>3</sub>SI [M+H]<sup>+</sup> 321.0021, found 321.0023.

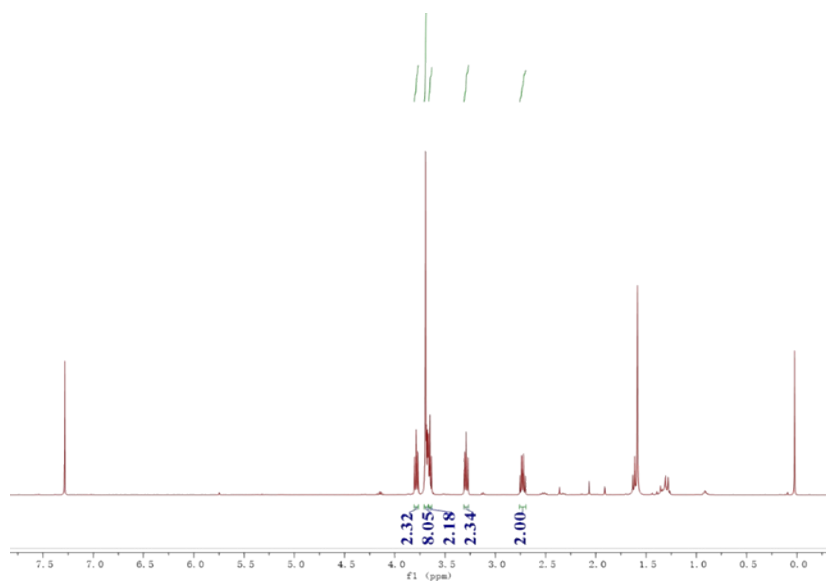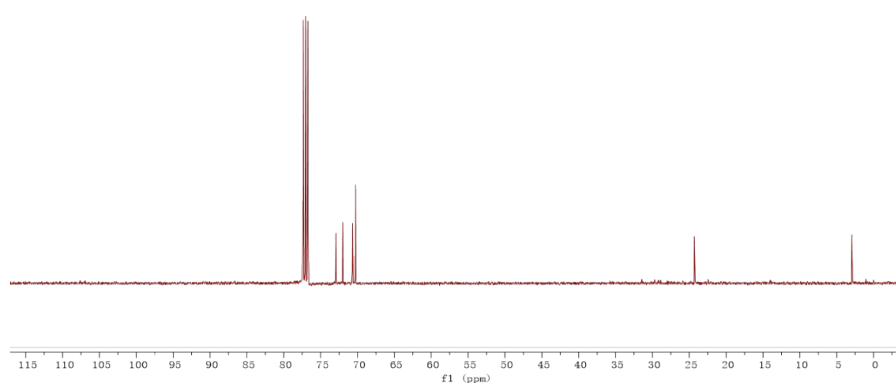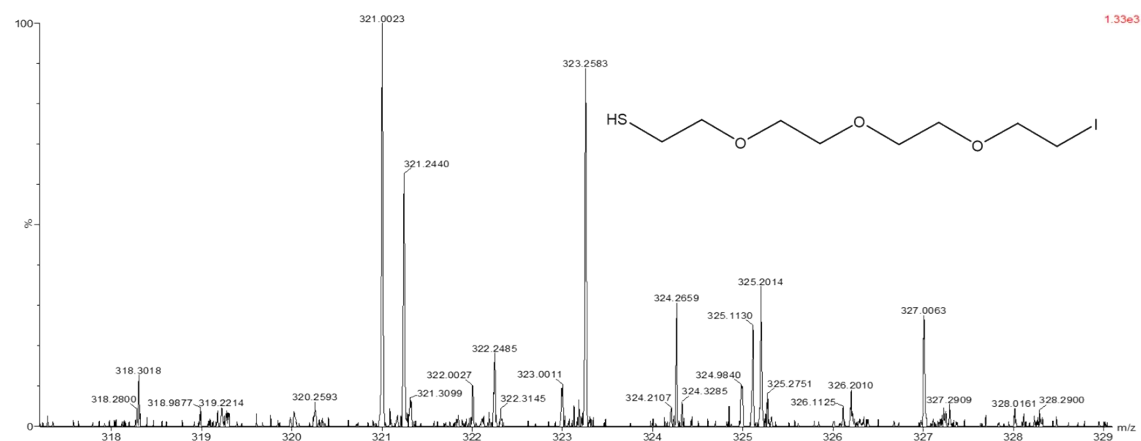

518 stirred solution of 3,6,9,12-tetraoxatetradecane-1,14-diyl bis(4-methylbenzenesulfonate)  
 519 (10.00 g, 18.32 mmol) in acetone (200.00 mL) was added powder NaI (10.98 g, 73.26 mmol).  
 520 The resulting clear yellow solution was heated as reflux for 48h. Then, cooled, filtered through  
 521 a plug of celite and concentrated to give yellow liquid. This was taken up in ether (200 mL)  
 522 washed with water (50 mL) and 10% aq. NaHSO<sub>3</sub> (20 mL), dried (NaHSO<sub>4</sub>), filtered. The crude  
 523 thiol product was purified by column chromatography on silica gel (hexanes). Yield: 6.68 g,  
 524 15.02 mmol, 82.0 %. <sup>1</sup>H NMR (400 MHz, Chloroform-*d*) δ 3.78 (t, *J* = 7.3, 6.6 Hz, 4H), 3.69  
 525 (s, *J* = 1.9 Hz, 12H), 3.29 (t, *J* = 6.9 Hz, 4H).

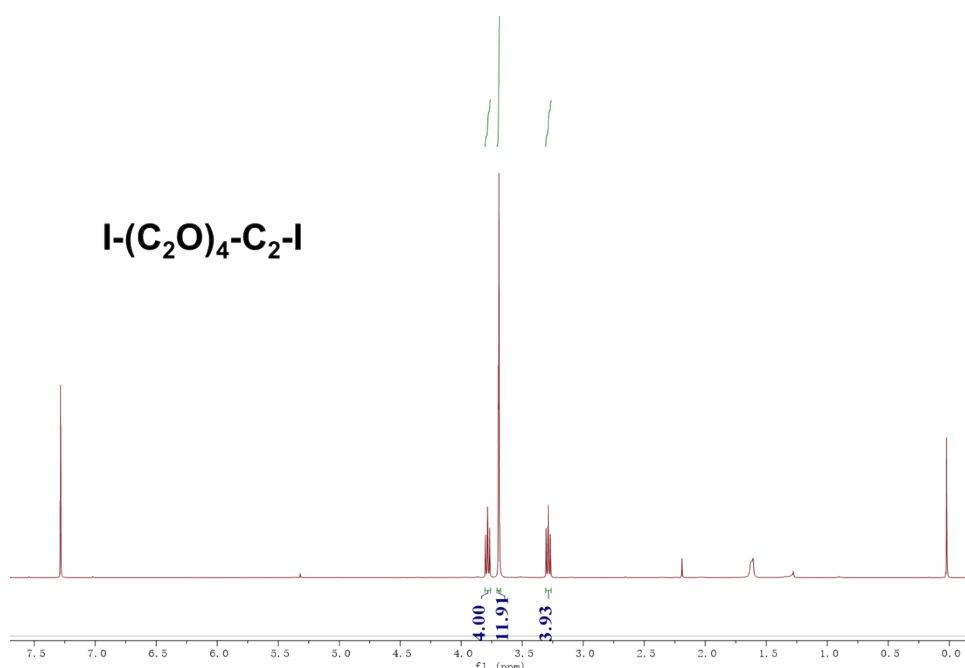

526  
 527 **Fig. S66.** The <sup>1</sup>H-NMR spectrum of compound I-(C<sub>2</sub>O)<sub>4</sub>-C<sub>2</sub>-I.

528  
 529 **S-(14-iodo-3,6,9,12-tetraoxatetradecyl) ethanethioate (I-(C<sub>2</sub>O)<sub>4</sub>-C<sub>2</sub>-SAc)** was prepared as  
 530 follows similar to the previous work reported.[1] 1,14-diiodo-3,6,9,12-tetraoxatetradecane  
 531 (6.68 g, 15.02 mmol) and potassium thioacetate (0.43 g, 3.76 mmol) were added into 100 mL  
 532 tetrahydrofuran, stirred for 12h at room temperature, followed by removal of the  
 533 tetrahydrofuran under reduced pressure. The residue was dissolved in diethyl ether, filtered,  
 534 and washed with DI water. The organic layer was dried over Na<sub>2</sub>SO<sub>4</sub>, filtered and concentrated  
 535 after which the raw product was purified with column chromatography with dichloromethane  
 536 and hexane (1: 10). Yield: 1.26 g (3.35 mmol, 89.0 % yield). <sup>1</sup>H NMR (400 MHz,

537 Chloroform-*d*)  $\delta$  3.78 (t,  $J$  = 6.9 Hz, 2H), 3.70 – 3.65 (m, 12H), 3.62 (t,  $J$  = 6.4 Hz, 2H), 3.29  
 538 (t,  $J$  = 6.9 Hz, 2H), 3.12 (t,  $J$  = 6.5 Hz, 2H), 2.36 (s, 3H).  $^{13}\text{C}$  NMR (100 MHz, Chloroform-*d*)  
 539  $\delta$  195.41, 71.98, 70.68, 70.66, 70.61, 70.53, 70.33, 70.24, 69.76, 30.56, 28.85, 2.94. HRMS  
 540 (ESI+):  $m/z$  calc for  $\text{C}_{12}\text{H}_{23}\text{O}_5\text{SI}$   $[\text{M}+\text{Na}]^+$  429.0203, found 429.0202.

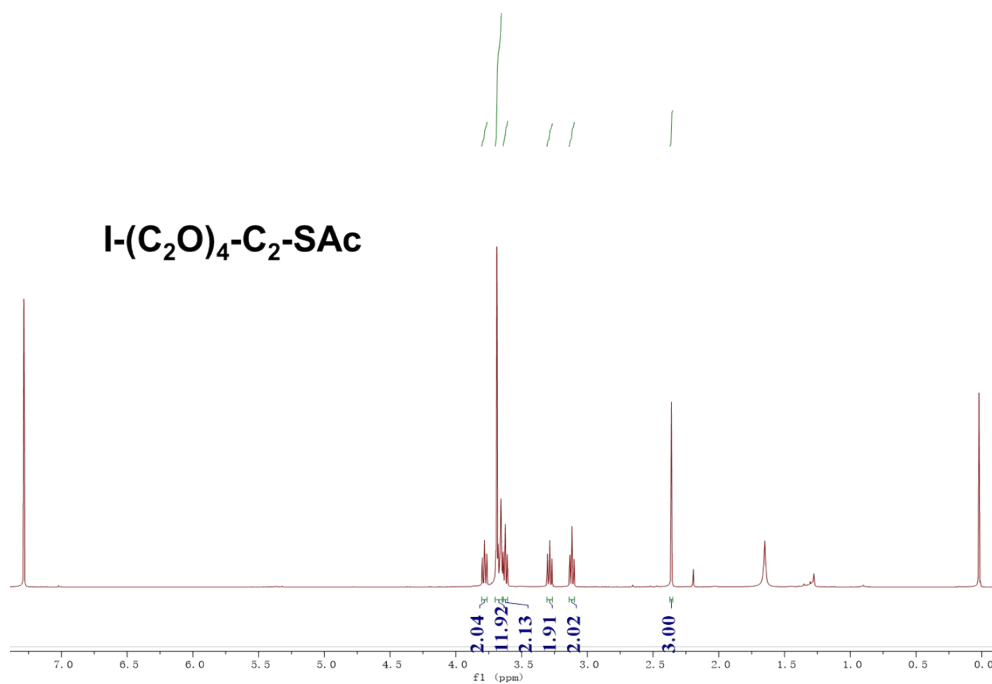

541

542 **Fig. S67.** The  $^1\text{H}$ -NMR spectrum of compound I-(C<sub>2</sub>O)<sub>4</sub>-C<sub>2</sub>-SAc.

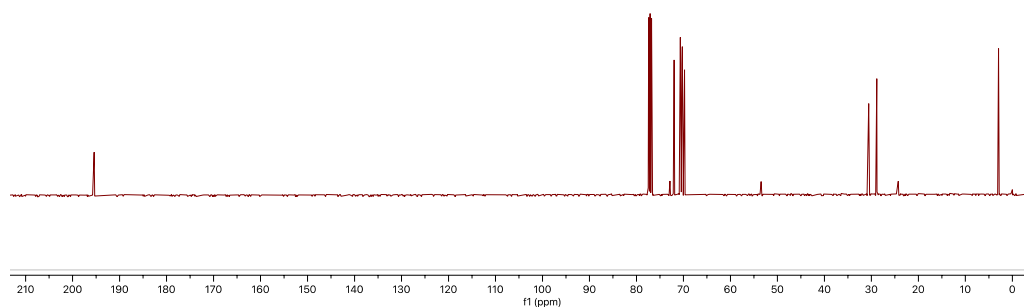

543

544 **Fig. S68.** The  $^{13}\text{C}$ -NMR spectrum of compound I-(C<sub>2</sub>O)<sub>4</sub>-C<sub>2</sub>-SAc.

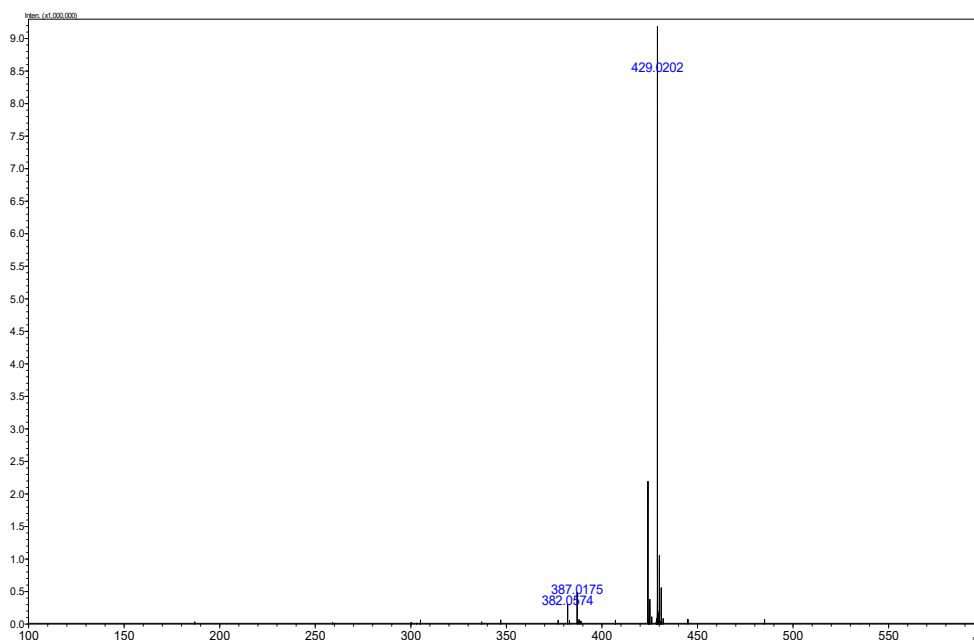

**Fig. S69.** The HRMS spectrum of compound I-(C<sub>2</sub>O)<sub>4</sub>-C<sub>2</sub>-SAc.

**14-iodo-3,6,9,12-tetraoxatetradecane-1-thiol (I-(C<sub>2</sub>O)<sub>4</sub>-C<sub>2</sub>-SH)** was prepared as follows. *S*-(14-iodo-3,6,9,12-tetraoxatetradecyl) ethanethioate (1.26 g, 3.35 mmol) was dissolved in 30 mL methanol and degassed for 20 min. Subsequently, 4.0 mL trifluoroacetic acid was added. The solution was refluxed for 5h then cooled down to room temperature. The solvent was removed by rotary evaporator; DCM was used to extract the product. The organic layer was washed with DI water 3 times before dried over anhydrous Na<sub>2</sub>SO<sub>4</sub>. After filtration and concentration, the raw product was purified by column chromatography with hexane as eluent. Yield: 18 % (0.22 g, 0.60 mmol). <sup>1</sup>H NMR (400 MHz, Chloroform-*d*) δ 3.78 – 3.75 (t, 2H), 3.67 (m, *J* = 7.0, 2.1 Hz, 12H), 3.62 (t, *J* = 6.4 Hz, 2H), 3.28 (t, *J* = 6.9 Hz, 2H), 2.71 (q, *J* = 8.2, 6.4 Hz, 2H). <sup>13</sup>C NMR (100 MHz, Chloroform-*d*) δ 72.87, 71.97, 70.70, 70.66, 70.62, 70.56, 70.25, 70.23, 24.30, 3.01. HRMS (ESI<sup>+</sup>): *m/z* calc for C<sub>10</sub>H<sub>22</sub>O<sub>4</sub>SI [M+H]<sup>+</sup> 365.0283, found 365.0259.

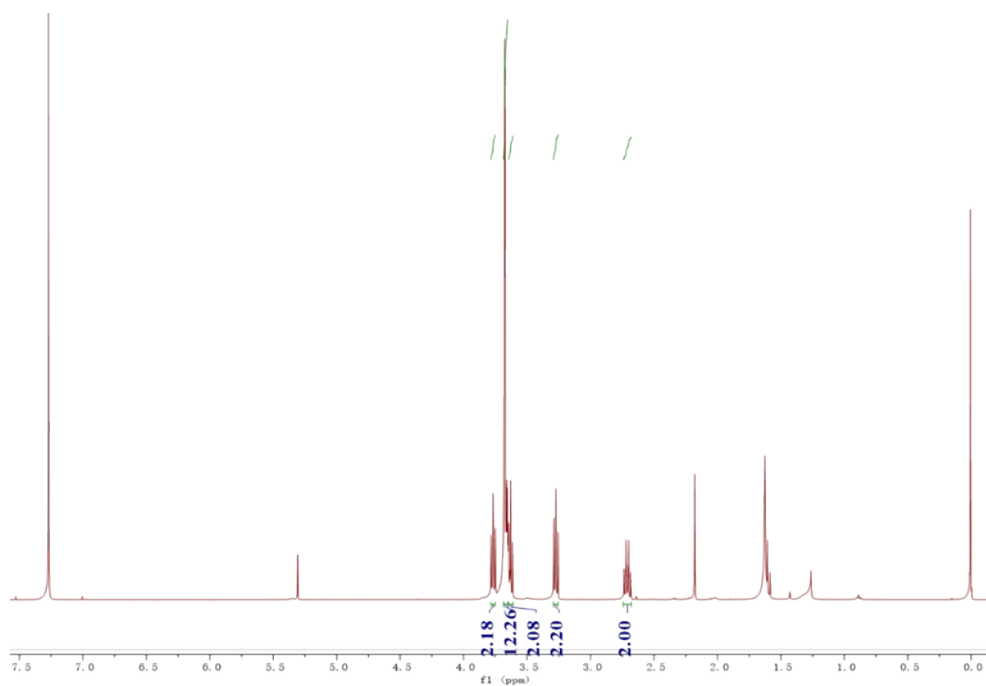

560

561 **Fig. S70.** The  $^1\text{H}$ -NMR spectrum of compound  $\text{HS}-(\text{C}_2\text{O})_4\text{-C}_2\text{-I}$ .

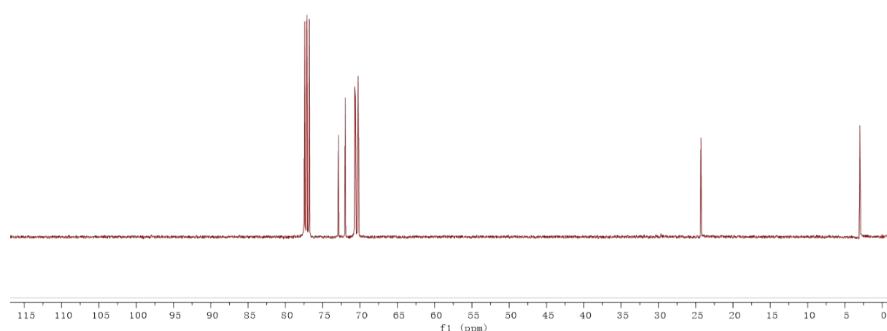

562

563 **Fig. S71.** The  $^{13}\text{C}$ -NMR spectrum of compound  $\text{HS}-(\text{C}_2\text{O})_4\text{-C}_2\text{-I}$ .

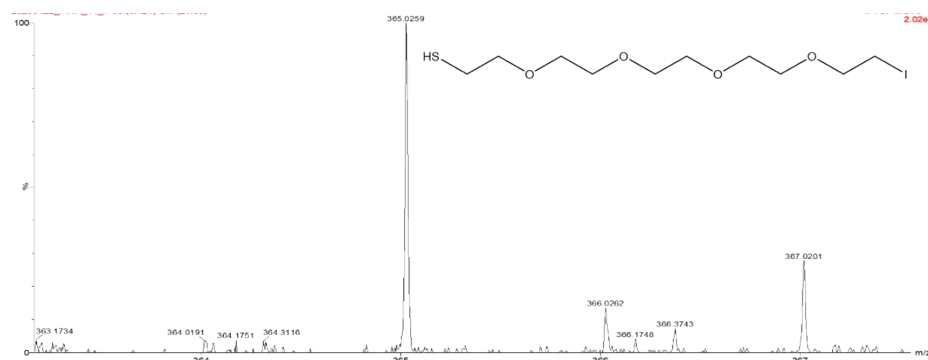

564

565 **Fig. S72.** The HRMS spectrum of compound  $\text{HS}-(\text{C}_2\text{O})_4\text{-C}_2\text{-I}$ .

566

567 **S2. SAMs preparations**

568 **Template-stripped Au surfaces ( $\text{Au}^{\text{TS}}$ ).**  $\text{Au}^{\text{TS}}$  substrates were prepared as our previous works

569 reported. <sup>[9-11]</sup> Firstly, Au (a purity of 99.999% from Dimu Materials, Inc (China)) film with  
570 thickness of ~200 nm was thermally deposited on the surface of clean Si (100) wafers (KYKY-  
571 400, Zhongke Ke Yi, China), which natively possesses a SiO<sub>2</sub> layer under the base pressure of  
572  $2 \times 10^{-5}$  Pa. In this process, the evaporation rate was primarily set as 0.2 Å/s at the first 50nm  
573 and then ~1 Å/s for the rest 150 nm. Secondly, the ultrasonically cleaned glass slides ( $1.5 \times 1.5$   
574 cm<sup>2</sup>) were dried in a stream of N<sub>2</sub> gas, followed by cleaned by a plasma of air for 5 mins at a  
575 pressure of 100 Pa. The slides were stuck on the Au substrate through photo-curable optical  
576 adhesive (Norland, No. 61). Thirdly, to cure the optical adhesive, the substrates were placed in  
577 a 100 Watt UV lamp at a distance of approximately 60 cm from the light source for about 1  
578 hour. Before preparation of SAMs, the slides with a layer of Au were lift-off by a razor blade.  
579 **SAMs preparation.** To assembled SAMs, the Au<sup>TS</sup> substrates were placed in degassed 1 mM  
580 ethanolic solutions of the targeted molecules overnight under the protection of inert nitrogen  
581 environment. After that, ethanol (AR grade) was utilized to remove the undensely packed  
582 molecules, like the physisorbed one, a stream of dry N<sub>2</sub> was used to gently dried the surface of  
583 SAMs, and conducted electrical measurements with minutes to avoid the degradation of Au-S  
584 covalent interactions as well as surface contaminations.

585

### 586 **S3. Sample Characterizations.**

587 **X-ray Photoelectron Spectroscopy (XPS) Measurements.** XPS was utilized to detect the  
588 quality and supermolecular molecular structures of the SAMs composed of the saturated  
589 molecules with instruments located in National Center of Electron Spectroscopy in Beijing.  
590 The Thermo Scientific K-Alpha XPS system was used as the incident X-ray beam with energy  
591 of 1486.6 eV. We collected the high-resolution XPS spectra of S 2p, C 1s, I 4f, O 1s. It is worth  
592 noted that the peaks of high-resolution XPS spectra of C 1s and O 1s may originated from the  
593 impurities absorbed on the surface of the SAMs in atmosphere. Therefore, detailed analysis of  
594 the compositional ratio of C and O for all SAMs seems to have little significance.  
595 To further analyze the chemical environments of each element, the least-square peak fit with a  
596 pseudo-Voigt function (a linear combination of Lorentzian (30%) and Gaussian (70%))

597 functions)[12] was utilized to fit the XPS spectra with Avantage software, and the sloping  
598 background was modelled using a smart background correction.

599 **Ultraviolet Photoelectron Spectroscopy (UPS) Measurements.** UPS was carried out to  
600 characterize the work function (WF) and the location of HOMO with instrument installed in  
601 the Thermo Scientific K-Alpha XPS system. The photon energy at 21.22 eV and -10 V bias  
602 was utilized to the samples to probe the valence band. The fermi edge of Au was regarded as  
603 the reference for all the UPS spectra.

604 As reported before [1, 13, 14], the S 2*p* spectra could incorporate the chemically adsorbed  
605 components (~162 eV), physical adsorbed components (~163 eV) and adsorption at defect sites  
606 (~161 eV). As for the I 3*d* XPS spectra that showed two signals in Fig. S74 and S76, other  
607 groups have also made these observations. [1, 15] They argued that the origin of these peaks is  
608 not clear, which has been attributed to the radiation damage or the formation of metal-I bonds.  
609 Hence, the I 3*d* spectra were mainly used to verify the detection of I element in the SAMs with  
610 the terminal I atom substitution. Besides, we also carried out the UPS characterizations for the  
611 prepared SAMs (Fig.s S77-S80 and Tables S1-S4), from which it could be seen that there is no  
612 significant difference in the energy offset ( $\delta E_{ME}$ ) for these SAMs, indicating that the SAMs  
613 have similar coverage and structure on the bottom electrode.



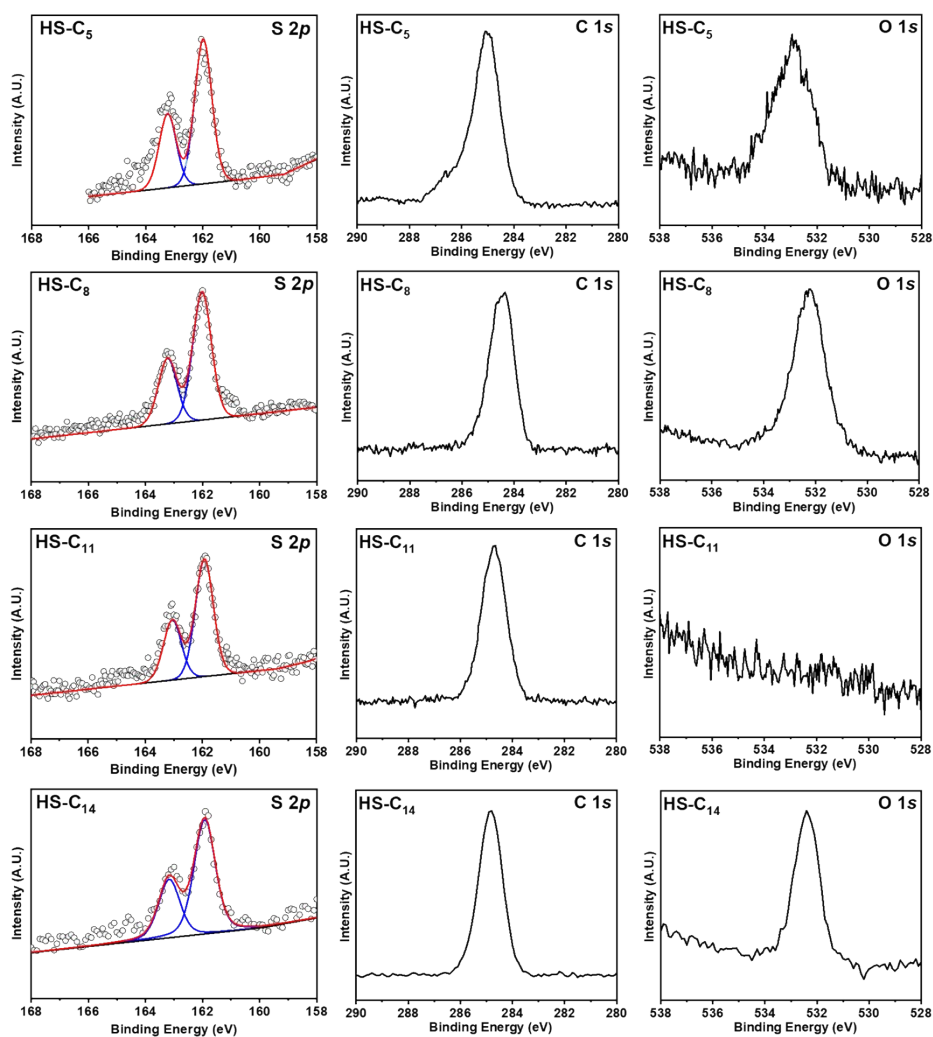

**Fig. S73.** The high resolution XPS S 2*p*, C 1*s* and O 1*s* spectra for Au-SC<sub>5</sub>, Au-SC<sub>8</sub>, Au-SC<sub>11</sub> and Au-SC<sub>14</sub>.

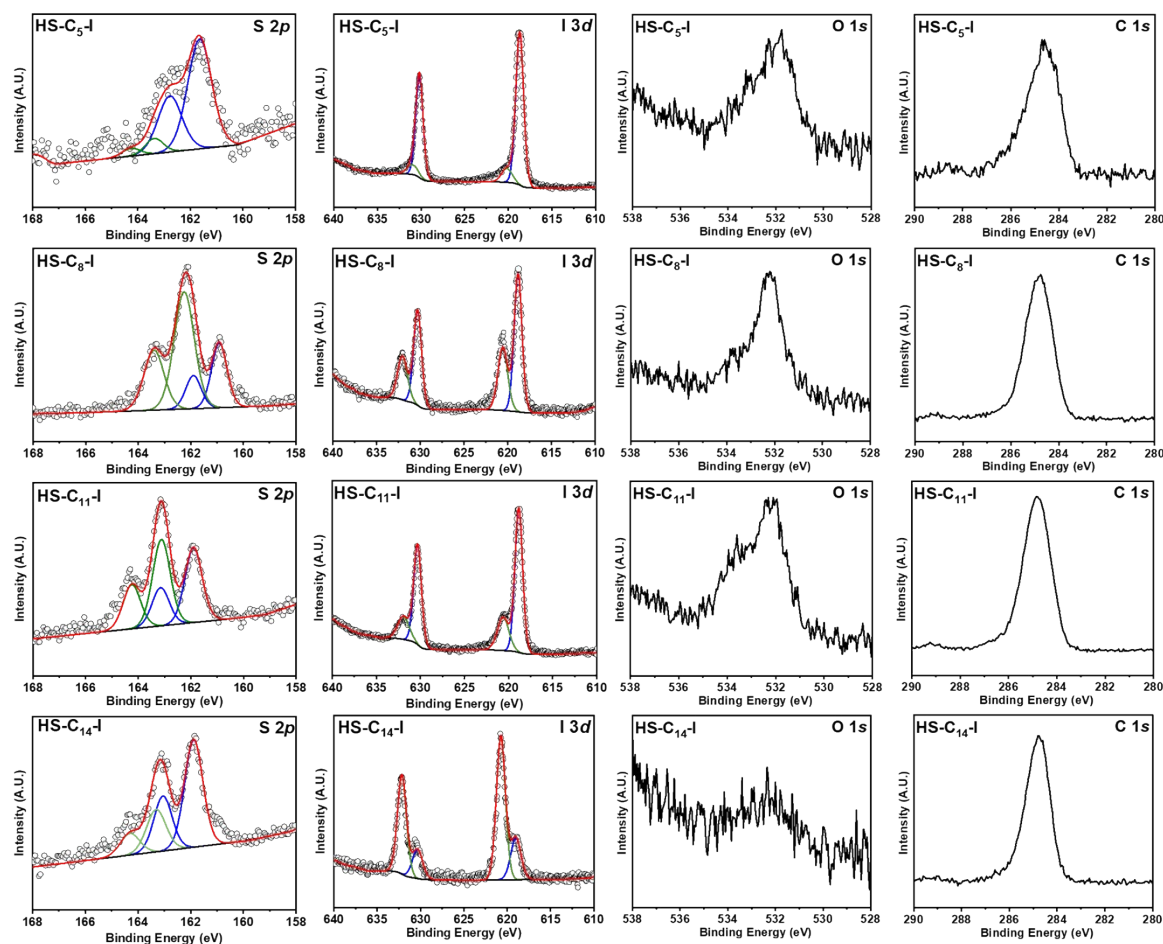

619

620 **Fig. S74.** The high resolution XPS S  $2p$ , C  $1s$  and O  $1s$  spectra for Au-SC<sub>5</sub>-I, Au-SC<sub>8</sub>-I, Au-

621 SC<sub>11</sub>-I and Au-SC<sub>14</sub>-I.

622

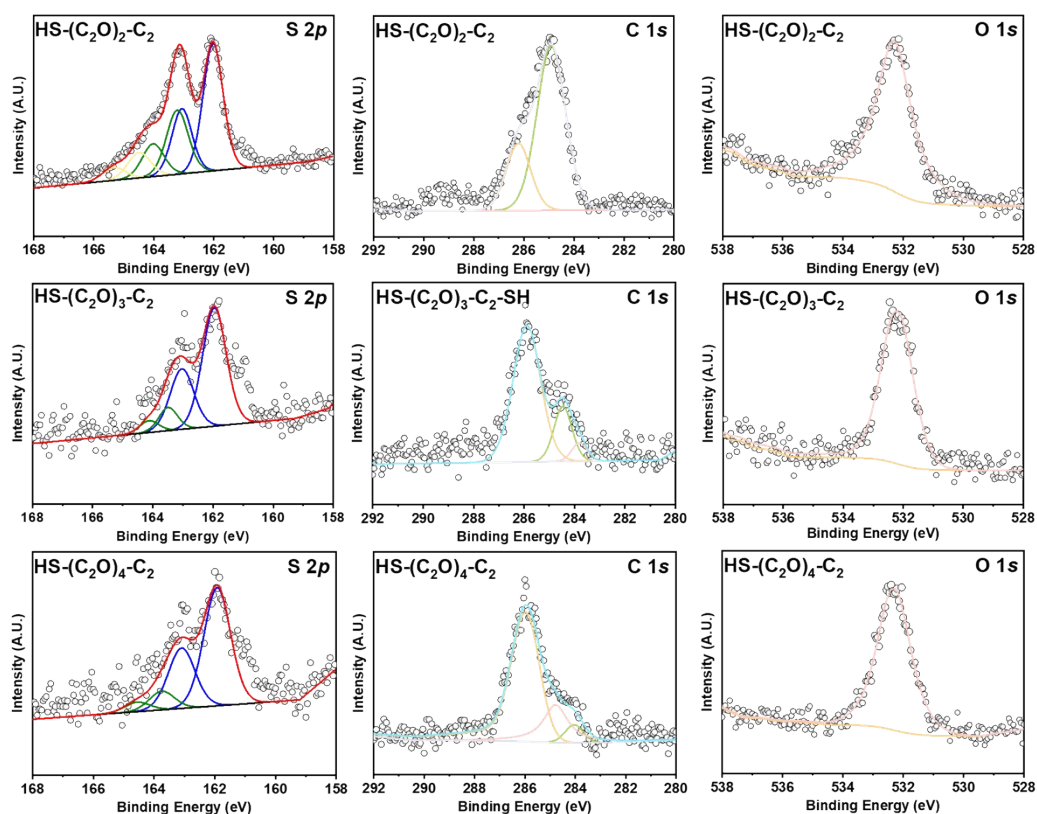

623

624 **Fig. S75.** The high resolution XPS S 2*p*, C 1*s* and O 1*s* spectra for Au-S(C<sub>2</sub>O)<sub>2</sub>-C<sub>2</sub>, Au-  
 625 S(C<sub>2</sub>O)<sub>3</sub>-C<sub>2</sub> and Au-S(C<sub>2</sub>O)<sub>4</sub>-C<sub>2</sub>.

626

627

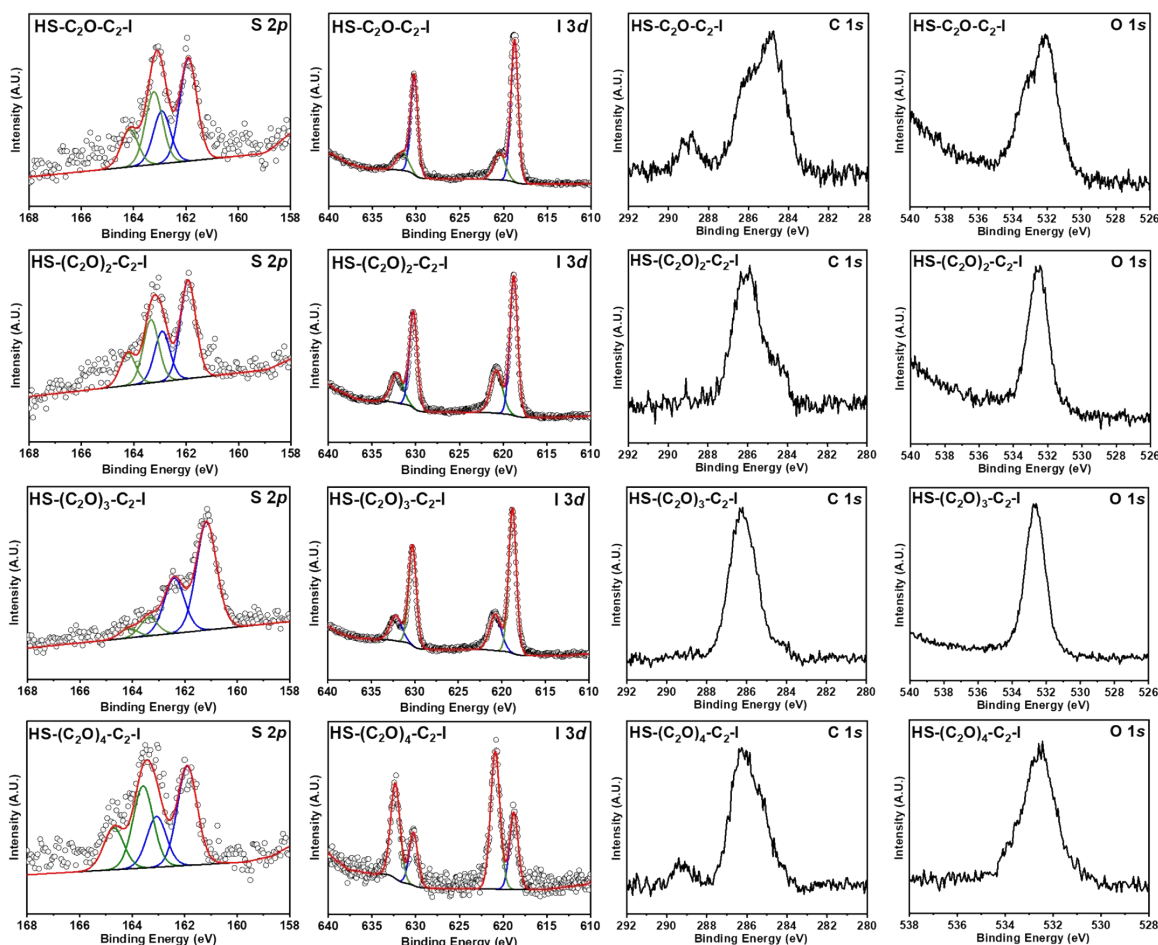

628

629 **Fig. S76.** The high resolution XPS S  $2p$ , C  $1s$  and O  $1s$  spectra for Au-SC<sub>2</sub>O-C<sub>2</sub>-I, Au-  
 630 S(C<sub>2</sub>O)<sub>2</sub>-C<sub>2</sub>-I, Au-S(C<sub>2</sub>O)<sub>3</sub>-C<sub>2</sub>-I and Au-S(C<sub>2</sub>O)<sub>4</sub>-C<sub>2</sub>-I.

631

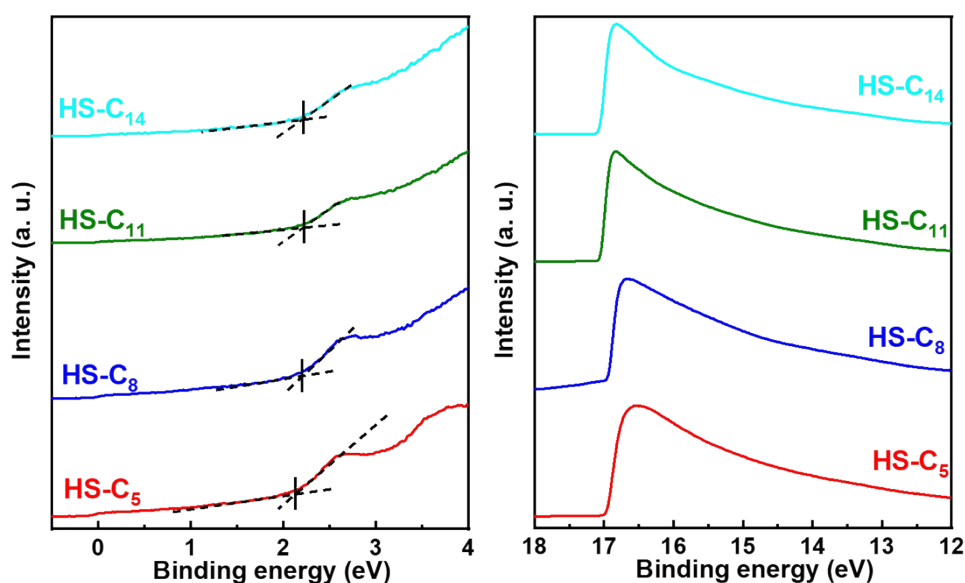

632

633 **Fig. S77.** Secondary cutoff and valence band spectra of the HOMO peak for Au-SC<sub>5</sub>, Au-SC<sub>8</sub>,  
 634 Au-SC<sub>11</sub> and Au-SC<sub>14</sub>. determined by UPS.

635 **Table S1.** Properties of the studied SAMs obtained by UPS

| Molecules          | $\delta E_{ME}$ (eV) | $E_{cut\ off}$ (eV) | WF (eV) | $E_{HOMO}$ (eV) |
|--------------------|----------------------|---------------------|---------|-----------------|
| HS-C <sub>5</sub>  | 2.10                 | 17.00               | 4.22    | -6.32           |
| HS-C <sub>8</sub>  | 2.17                 | 16.96               | 4.26    | -6.43           |
| HS-C <sub>11</sub> | 2.13                 | 17.06               | 4.16    | -6.29           |
| HS-C <sub>14</sub> | 2.13                 | 17.09               | 4.13    | -6.26           |

636

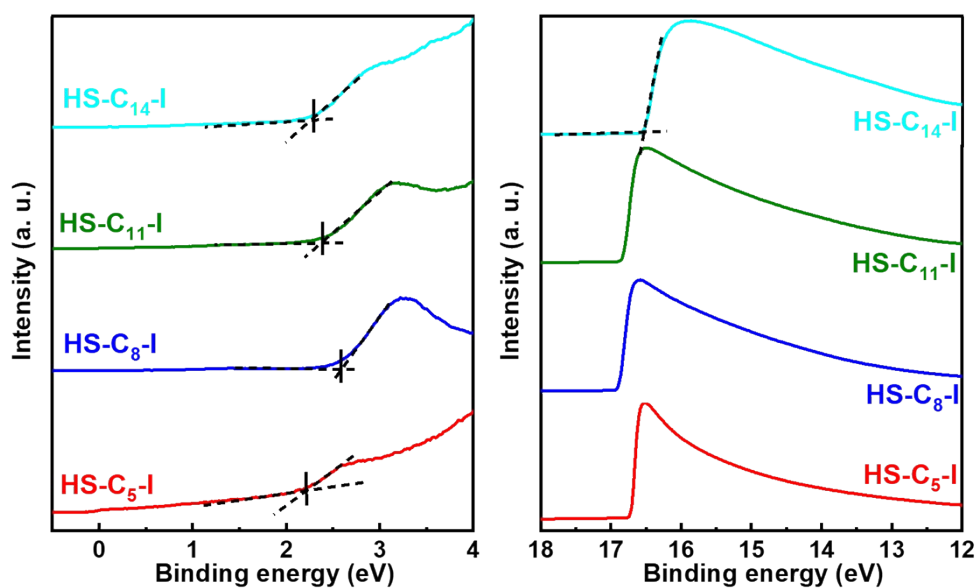

637

638 **Fig. S78.** Secondary cutoff and valence band spectra of the HOMO peak for Au-SC<sub>5</sub>-I, Au-  
639 SC<sub>8</sub>-I, Au-SC<sub>11</sub>-I and Au-SC<sub>14</sub>-I. determined by UPS.

640

641 **Table S2.** Properties of the studied SAMs obtained by UPS

| Molecules             | $\delta E_{ME}$ (eV) | $E_{cut\ off}$ (eV) | WF (eV) | $E_{HOMO}$ (eV) |
|-----------------------|----------------------|---------------------|---------|-----------------|
| HS-C <sub>5</sub> -I  | 2.11                 | 16.75               | 4.47    | -6.58           |
| HS-C <sub>8</sub> -I  | 2.57                 | 16.87               | 4.35    | -6.92           |
| HS-C <sub>11</sub> -I | 2.38                 | 16.82               | 4.40    | -6.78           |
| HS-C <sub>14</sub> -I | 2.28                 | 16.53               | 4.69    | -6.97           |

642

643

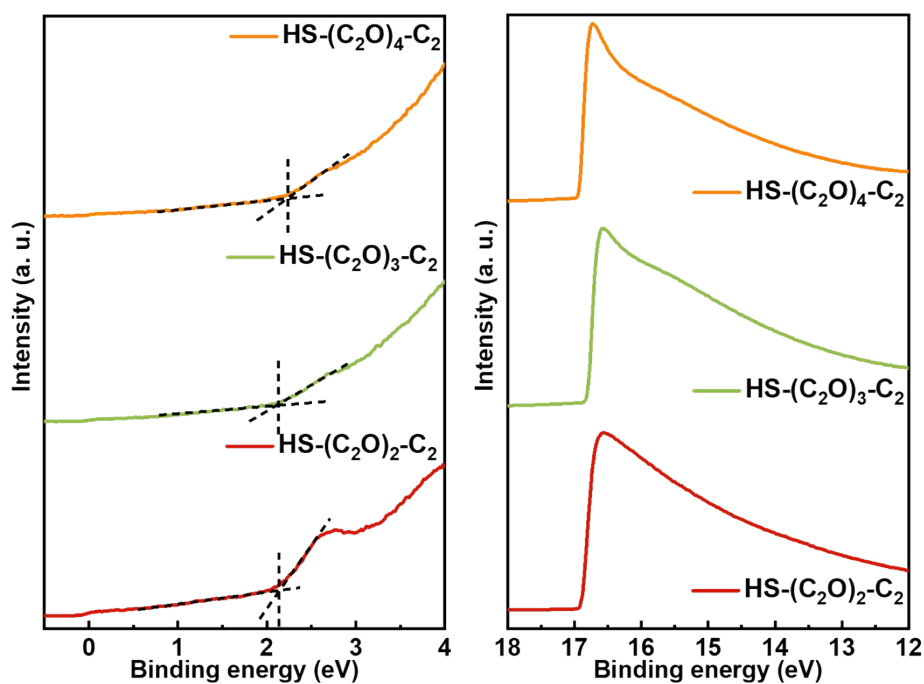

**Fig. S79.** Secondary cutoff and valence band spectra of the HOMO peak for Au-S(C<sub>2</sub>O)<sub>2</sub>-C<sub>2</sub>, Au-S(C<sub>2</sub>O)<sub>3</sub>-C<sub>2</sub> and Au-S(C<sub>2</sub>O)<sub>4</sub>-C<sub>2</sub> determined by UPS.

**Table S3.** Properties of the studied SAMs obtained by UPS

| Molecules                                          | $\delta E_{ME}$ (eV) | $E_{\text{cut off}}$ (eV) | WF (eV) | $E_{\text{HOMO}}$ (eV) |
|----------------------------------------------------|----------------------|---------------------------|---------|------------------------|
| HS-(C <sub>2</sub> O) <sub>2</sub> -C <sub>2</sub> | 2.13                 | 16.92                     | 4.30    | -6.43                  |
| HS-(C <sub>2</sub> O) <sub>3</sub> -C <sub>2</sub> | 2.09                 | 16.82                     | 4.40    | -6.49                  |
| HS-(C <sub>2</sub> O) <sub>4</sub> -C <sub>2</sub> | 2.22                 | 16.94                     | 4.28    | -6.50                  |

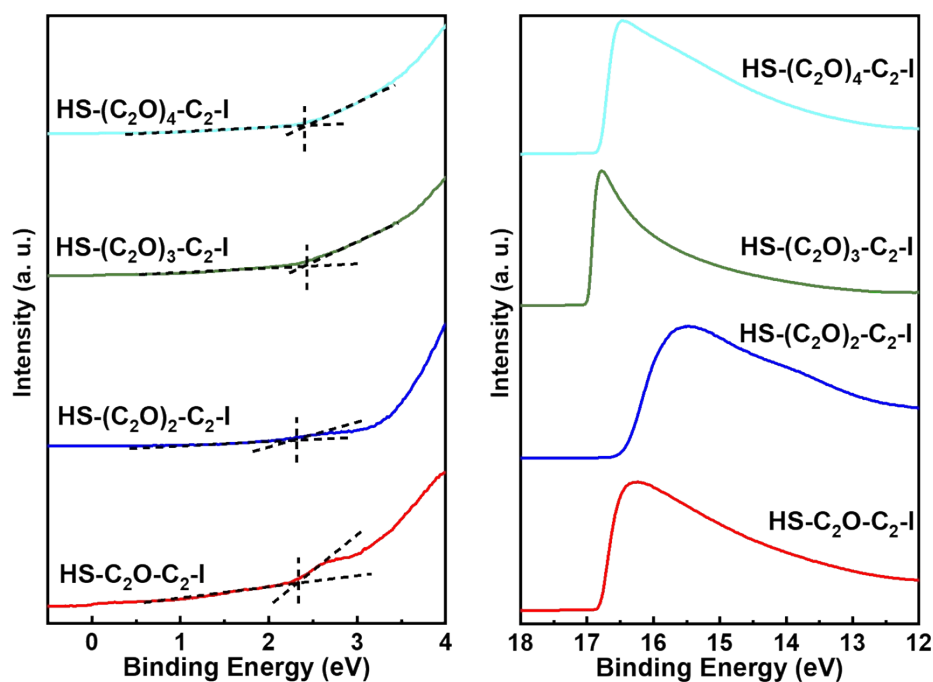

**Fig. S80.** Secondary cutoff and valence band spectra of the HOMO peak for Au-SC<sub>2</sub>O-C<sub>2</sub>-I, Au-S(C<sub>2</sub>O)<sub>2</sub>-C<sub>2</sub>-I, Au-S(C<sub>2</sub>O)<sub>3</sub>-C<sub>2</sub>-I and Au-S(C<sub>2</sub>O)<sub>4</sub>-C<sub>2</sub>-I determined by UPS.

**Table S4.** Properties of the studied SAMs obtained by UPS

| Molecules                                             | $\delta E_{ME}$ (eV) | $E_{cut\ off}$ (eV) | WF (eV) | $E_{HOMO}$ (eV) |
|-------------------------------------------------------|----------------------|---------------------|---------|-----------------|
| HS-C <sub>2</sub> O-C <sub>2</sub> -I                 | 2.22                 | 16.84               | 4.38    | -6.60           |
| HS-(C <sub>2</sub> O) <sub>2</sub> -C <sub>2</sub> -I | 2.31                 | 16.52               | 4.70    | -7.01           |
| HS-(C <sub>2</sub> O) <sub>3</sub> -C <sub>2</sub> -I | 2.42                 | 17.00               | 4.22    | -6.64           |
| HS-(C <sub>2</sub> O) <sub>4</sub> -C <sub>2</sub> -I | 2.40                 | 16.80               | 4.42    | -6.82           |

#### S4. Electrical conductance measurements and analysis.

According to our previous work, [9, 10] the cone-shaped tips of Ga<sub>2</sub>O<sub>3</sub>/EGaIn was contacted with SAMs to form molecular junctions. One of the most important components of the EGaIn junction setup is the micromanipulator (Leica) equipped with a 10- $\mu$ L glass syringe (Hamilton, 1701RNR) with a metal needle (Hamilton, conical shape 26s) from which the cone-shaped Ga<sub>2</sub>O<sub>3</sub>/EGaIn top-electrodes are suspended. The drift of this micromanipulator is small (1 nm / h) and it can move the top electrode at a precision of 10 nm precision in the z direction and up to 10 cm in the x direction. The micromanipulator is mounted on an M6 threaded aluminum

breadboard board, along with a USB camera (Edmund Optics, EO-3112C color USB camera) on the a XYZ translation stage with zoom magnification of 4: 1 and 2.5-10 times (Edmund Optics, VZM 100DI) to image and determine the diameter of computer nodes on the screen. The system can magnify a node with a typical diameter of 20  $\mu\text{m}$  by up to 400 times. In order to ensure good electrical contact, a copper wire is welded to the microneedle of the syringe that was attached to the instrument with an alligator clips. A micro-positioner (Crest innovation, S-725PLM) is used to hold the tip of the tungsten probe that is penetrated the SAM and formed direct electrical contact with the  $\text{Au}^{\text{TS}}$  substrate. The entire setup is placed in an aluminum box on an optical table (Zolix) that dampened the vibrations. The cameras, piezoelectric and source gauges are connected to external computers and controlled by LabView. To measure the conductance of the SAMs, the bottom electrode was grounded and the top electrode of  $\text{Ga}_2\text{O}_3/\text{EGaIn}$  tip was biased using a sub-femtoamp source meter (Keithley 6430) and shielding cable. To prepare a new cone-shaped tip of  $\text{Ga}_2\text{O}_3/\text{EGaIn}$ , the syringe was positioned near a bare  $\text{Au}^{\text{TS}}$  substrate. We squeeze out a small drop of EGaIn so that it remains attached to the tip of the syringe needle, then it was made contact with a freshly prepared sacrificial surface. By slowly lifting the microneedle from  $\text{Ga}_2\text{O}_3/\text{EGaIn}$  towards z direction, the  $\text{Ga}_2\text{O}_3/\text{EGaIn}$  drop deformed and formed two head-to-head connectors. Finally, the two cones separated, resulting in a cone-shaped tip of  $\text{Ga}_2\text{O}_3/\text{EGaIn}$  suspended on a miniature needle and another standing on the  $\text{Au}^{\text{TS}}$  surface. The sacrificial  $\text{Au}^{\text{TS}}$  surface are discarded in favor of  $\text{Au}^{\text{TS}}$  surface that support interested SAMs. The conical-shaped  $\text{Ga}_2\text{O}_3/\text{EGaIn}$  is about 10 to 20 microns in diameter, depending on the speed at which the tiny needle is pulled from the  $\text{Ga}_2\text{O}_3/\text{EGaIn}$  droplet. The final step, with the camera trained on the node, is to make contact with the SAMs via the conical tip of  $\text{Ga}_2\text{O}_3/\text{EGaIn}$  to fabricate the molecular junctions. During the electrical conductance measurements, the  $\text{Au}^{\text{TS}}$  bottom electrode was grounded and the EGaIn electrode was biased from  $0\text{V} \rightarrow +0.5\text{ V} \rightarrow 0\text{V} \rightarrow -0.5\text{ V} \rightarrow 0\text{V}$ , with a step size of 50 mV and a delay of 0.1 s. We collected at least three samples to obtain  $\geq 20$  junctions, each with 20-24  $J(V)$  traces, which contains a total of  $\sim 480 J(V)$  traces for each type of SAM. Then, the histograms of  $\log_{10}|J|$  were plotted for each bias and fitted Gaussians to the histograms to



692 obtain the log-mean ( $\mu_{\log}$ ) of the values of  $J$  and their log standard-deviations ( $\sigma_{\log}$ ).

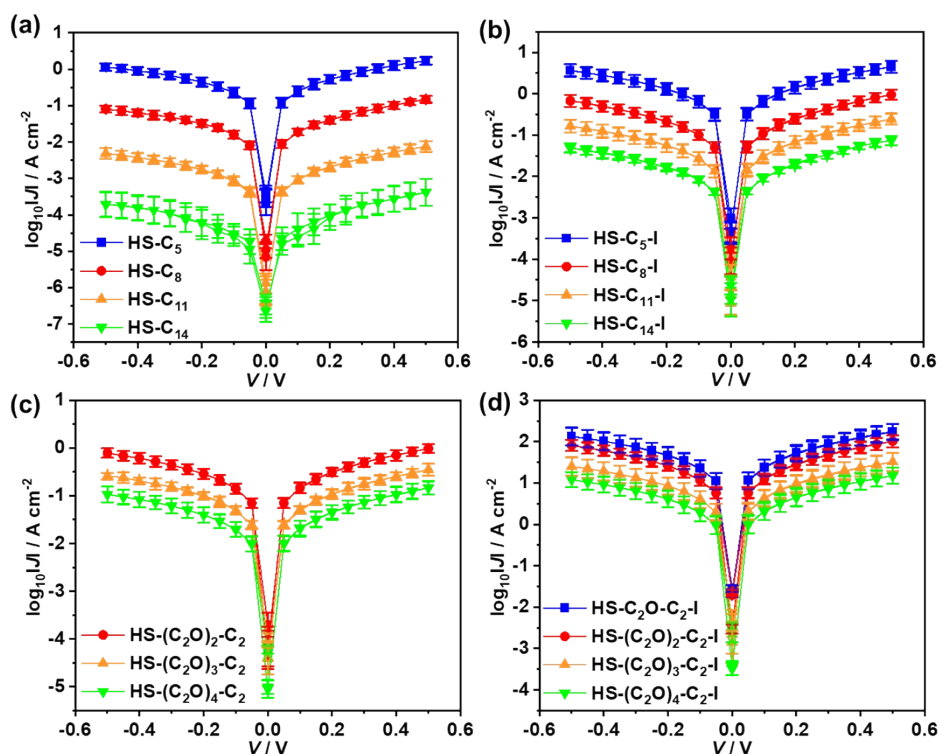

693

694 **Fig. S81.** Average plots of the  $\log_{10}|J|$ - $V$  of (a)  $\text{HS-C}_n$  ( $n = 5, 8, 10, 11$ ), (b)  $\text{HS-C}_n\text{-I}$  ( $n = 5, 8,$   
695  $10, 11$ ), (c)  $\text{HS-(C}_2\text{O)}_m\text{-C}_2$  ( $m = 2, 3, 4$ ), (d)  $\text{HS-(C}_2\text{O)}_m\text{-C}_2\text{-I}$  ( $m = 1, 2, 3, 4$ ).

696

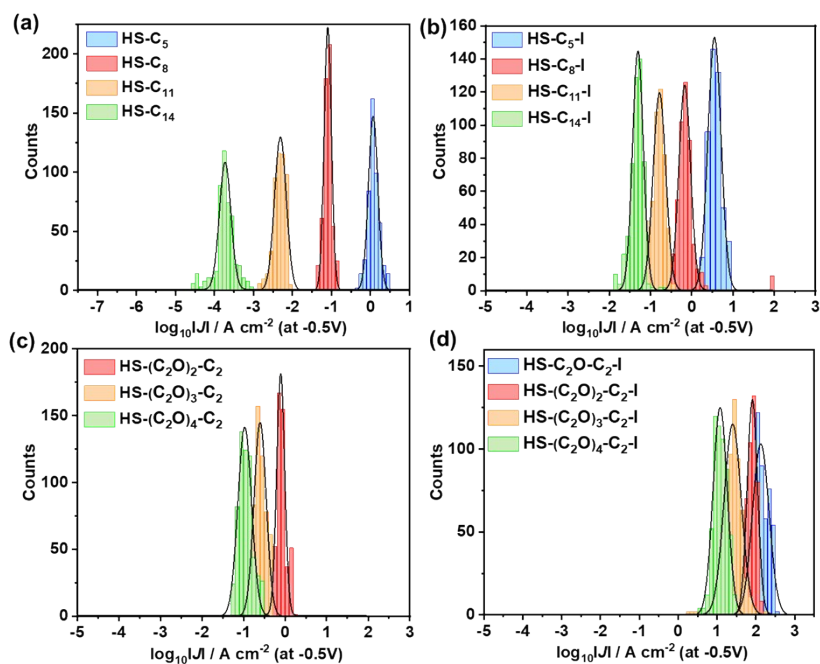

697

698 **Fig. S82.** The histograms of  $\log_{10}|J|$  at  $-0.5\text{V}$  with Gaussian fits for (a)  $\text{HS-C}_n$  ( $n = 5, 8, 10,$   
699  $11$ ), (b)  $\text{HS-C}_n\text{-I}$  ( $n = 5, 8, 10, 11$ ), (c)  $\text{HS-(C}_2\text{O)}_m\text{-C}_2$  ( $m = 2, 3, 4$ ), (d)  $\text{HS-(C}_2\text{O)}_m\text{-C}_2\text{-I}$  ( $m =$

700 1, 2, 3, 4).

701

## 702 **S5. Thermoelectrical measurements and determination of PF for the molecular junctions.**

703 The processes of obtaining the  $S$  of molecular junctions were followed by our previous work.

704 [11] Based on the “EGaIn” junction setup, we introduce a polyimide (PI) film embedded with

705 multiple heating resistors to heat the bottom electrode generating temperature difference ( $\Delta T =$

706 2.0 K, 3.5 K, 5.0 K) across the molecular junctions as shown in Fig. S83a and S83b. Molecules

707 were assembled on the Au<sup>TS</sup> electrodes and the conical shaped tips of EGaIn were used to

708 conformally contact the top-surface of the SAMs eventually forming molecular thermoelectric

709 junctions. When the Au<sup>TS</sup> electrode was heated,  $S$  of the SAMs, according to Seebeck effect,

710 can be determined by measuring the thermoelectric voltage ( $\Delta V$ ) across the junction and

711 deducing the relationship between  $\Delta V$  and Seebeck coefficient. The values of  $\Delta V$  for the SAMs

712 at applied  $\Delta T$  were obtained by the voltmeter (2182A Nanovoltmeter, Keithley Inc., USA). The

713 temperature of the Au<sup>TS</sup> electrode and the end of the metal needle (Hamilton, conical shape

714 26s) were monitored by thermal couple with a detection limit of 0.01K, simultaneously, from

715 which we can roughly extracted the  $\Delta T$  across the molecular junction induced by the PI film.

716 Typical thermoelectric-voltage traces of the Au<sup>TS</sup>-S-C<sub>2</sub>O-C<sub>2</sub>-I//Ga<sub>2</sub>O<sub>3</sub>/EGaIn junctions at

717 different  $\Delta T$  are shown in Fig. S83c. Wherein,  $V_1$  refers to the initial voltage across a junction

718 without  $\Delta T$  (the magnitude of  $V_1$  originated from chemical potential difference at the

719 SAM/electrode interface at room temperature (RT)), the average of  $V_1$  ( $\langle V_1 \rangle$ ) and its standard

720 deviation could be obtained over ~50 s test duration (rate of data acquisition: 10 data points of

721 voltage per second) with a Gaussian fit.

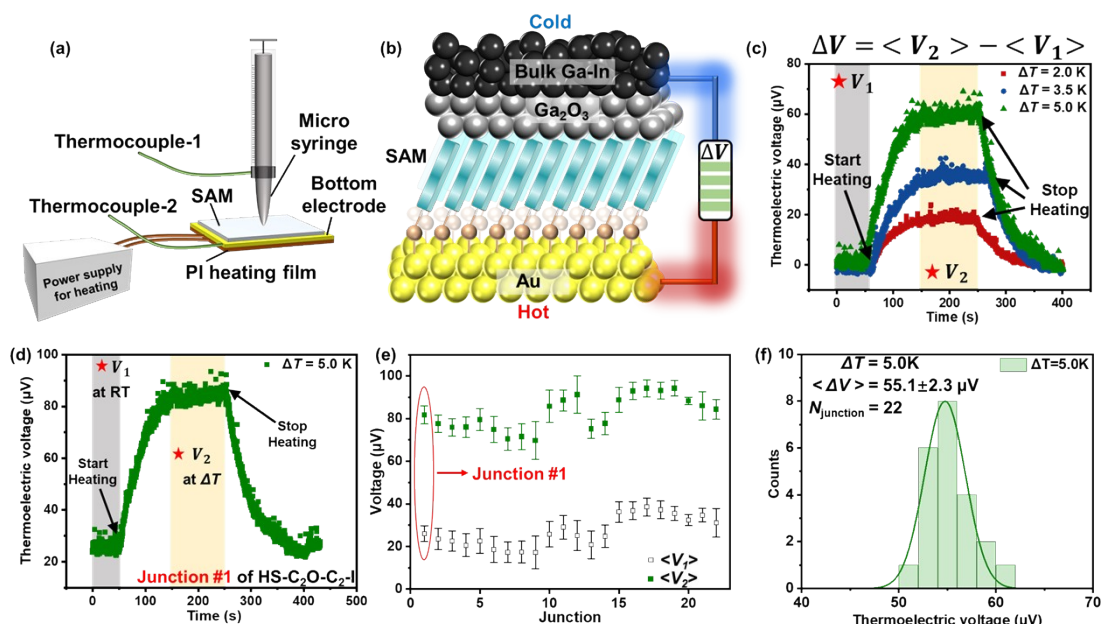

722

723 **Fig. S83. The demonstrations of thermoelectric measurements conducted by the EGaIn**  
 724 **technique.** (a) The schematic diagram of the thermoelectric testbed developed from EGaIn

725 technique. (b) The schematic illustration of a SAM-based thermoelectric junction (panel (a)

726 and (b) are cited from our previous work[11]). (c) Thermoelectric voltage of Au<sup>TS</sup>-S-C<sub>2</sub>O-C<sub>2</sub>-  
 727 I//Ga<sub>2</sub>O<sub>3</sub>/EGaIn junctions at  $\Delta T = 2.0$  K (red),  $\Delta T = 3.5$  K (blue) and  $\Delta T = 5.0$  K (green). (d)

728 Typical thermoelectric-voltage trace for Au<sup>TS</sup>-S-C<sub>2</sub>O-C<sub>2</sub>-I ( $\Delta T = 5$  K). (e) The plot of  $\Delta V$

729 against number of junctions from the SAMs of HS-C<sub>2</sub>O-C<sub>2</sub>-I at  $\Delta T = 5.0$  K. (f) The plot of

730 histograms of  $\langle \Delta V \rangle$  (the mean value of  $\Delta V$ ) over 20 junctions with a Gaussian fit.

731

732 Once we heated the bottom electrode,  $\Delta T$  occurred and the measured voltage was  
 733 positively shifted. When the junction reached thermal equilibrium, the average of  $V_2$  ( $\langle V_2 \rangle$ )

734 and its standard deviation were calculated over 100 s test time with a Gaussian fit. Then, the

735  $\Delta V$  was obtained by using  $\langle V_2 \rangle$  subtracting  $\langle V_1 \rangle$  at a certain  $\Delta T$  for each junction. Fig.. S83c

736 shows that the measured values of  $\Delta V$  of Au<sup>TS</sup>-S-C<sub>2</sub>O-C<sub>2</sub>-I//Ga<sub>2</sub>O<sub>3</sub>/EGaIn junction were

737 enhanced as  $\Delta T$  increased, verifiably demonstrating that our method is suitable for testing the

738 thermoelectric effects of molecular junctions with high stability. In order to draw statistically

739 robust results, we collected large amounts of experimental data. Fig. S83d depicts a typical

740 thermoelectric voltage trace for Au<sup>TS</sup>-S-C<sub>2</sub>O-C<sub>2</sub>-I ( $\Delta T = 5.0$  K). As mentioned above, we

741 carried out micro-voltage measurements across 400~450 seconds in total for each molecular  
 742 junction, and each thermoelectric-voltage trace contained three stable sections: the first section  
 743 started from 0 to 50 s which contained ~500 data points of  $V_1$  (typically ranging from 10.00  $\mu$ V  
 744 to 40.00  $\mu$ V); the second section started from ~150 s to ~250 s which contained ~1000 data  
 745 points of  $V_2$ ; the third section started from the time when heating stopped till the voltage  
 746 dropped to a constant value close to  $V_1$  for another 100s (from 350s to 400s). Fig. S83e shows  
 747  $\Delta V$  measured with 22 junctions of Au<sup>TS</sup>-S-C<sub>2</sub>O-C<sub>2</sub>-I at  $\Delta T = 5.0$  K on three samples. For each  
 748 junction, for instance the junction #1 marked with red ellipse in Fig. S83e, the black empty  
 749 square represented  $\langle V_1 \rangle$  averaged from ~500 data points of  $V_1$ , and the green solid square  
 750 represented  $\langle V_2 \rangle$  averaged from ~1000 data points of  $V_2$ . We recorded at least 20 junctions for  
 751 each SAM at each applied  $\Delta T$  on three samples in order to generate a histogram of  $\Delta V$  that can  
 752 be fitted with Gaussians to determine the mean value of  $\Delta V$  ( $\langle \Delta V \rangle$ ) and the corresponded  
 753 standard-deviation, as shown in Fig. S83f.

754 We proposed that the contact area between the EGaIn tip and the SAMs as well as the  
 755 details of the shape of the EGaIn conical surface had insignificant influences on the mean  
 756 values of Seebeck coefficient of the molecular junctions. The reasons were explained as  
 757 bellow: 1) according to Reddy *et al.* [16], the molecules in a multiple molecule junction acted  
 758 as independent channels when the intermolecular interactions were weak, indicating that the  
 759 measured multiple molecule junction (monolayer) Seebeck coefficients were in very good  
 760 agreement with previous measurements of corresponding single-molecule junctions; 2) the  
 761 surface area of the heated bottom electrode ( $> 1$  cm<sup>2</sup>) was dramatically larger than that of the  
 762 cold EGaIn tip contacting with the SAMs (~100  $\mu$ m<sup>2</sup>), hence, the small change in the contact  
 763 area between the EGaIn tip and the SAMs had tiny effect on the amount of heat transferring  
 764 from the bottom electrode (hot side) to the EGaIn electrode (cold side); 3) the extracted  
 765 Seebeck coefficient was based on the statistically significant value over 21 different junctions  
 766 on three samples, which could reduce the error of the experimental data to a considerable  
 767 degree induced by various shape of the EGaIn surface.

768

769 **Analysis of relationship between measured  $\Delta V$  and  $S$  of the SAMs.** As shown in Fig. S84,  
 770 after the SAMs assembled on Au<sup>TS</sup> electrode,  $T_1$ ,  $V_1$  and  $T_4$ ,  $V_4$  were defined as the temperature  
 771 (room temperature) and potential of Syringe and tungsten (W) tip away from SAMs,  
 772 respectively ( $T_1 = T_4$ ).  $T_2$  and  $V_2$  were the temperature measured by thermocouple potential of  
 773 Syringe close to SAMs.  $V_3$  and  $T_3$  are the potential and temperature of Au surface. We found  
 774 that the measured  $T_2$  was higher than room temperature and approximately half as  $T_3$  perhaps  
 775 due to the heat radiation and convection from the bottom electrode to the EGaIn tip. We defined  
 776 that  $\Delta T$  was the temperature difference between the temperature of Syringe ( $T_1$ , room  
 777 temperature) or tungsten tip ( $T_4$ , room temperature) away from the SAMs and the temperature  
 778 of the heated bottom electrode,  $\Delta T_3 = (T_1 - T_3) = (T_4 - T_3)$ ;  $\Delta T_1$  was equivalent to  $(T_1 - T_2)$ ;  $\Delta T_2$   
 779 was equivalent to  $(T_2 - T_3)$ . Considering the measured  $T_2$  was half of  $T_3$ , we inferred that the  
 780 value of  $\Delta T_1$  was almost the same as  $\Delta T_2$ . Then, the temperature difference ( $\Delta T$ ) across the  
 781 molecular junction could be described as bellow (Equation S1):

$$782 \quad \Delta T = \Delta T_2 \approx \Delta T_1 = \frac{1}{2} \Delta T_3 = (T_1 - T_3) \quad (S1)$$

783 Therefore, the relationship between  $S$  and measured  $\Delta V$  for Au/SAM//Ga<sub>2</sub>O<sub>3</sub>/EGaIn junctions  
 784 can be generally depicted as Equation S2-S6.

$$785 \quad S_{EGaIn} = -\frac{V_1 - V_2}{T_1 - T_2} = -\frac{\Delta V_1}{\Delta T_1} = -\frac{V_1 - V_2}{\Delta T} \quad (S2)$$

$$786 \quad S_{SAM} = -\frac{V_2 - V_3}{T_2 - T_3} = -\frac{\Delta V_2}{\Delta T_2} = -\frac{V_2 - V_3}{\Delta T} \quad (S3)$$

$$787 \quad S_W = -\frac{V_4 - V_3}{T_4 - T_3} = -\frac{\Delta V_3}{\Delta T_3} = -\frac{V_4 - V_3}{2\Delta T} \quad (S4)$$

$$788 \quad S_{EGaIn} + S_{SAM} - 2S_W = -\frac{V_1 - V_2}{\Delta T} - \frac{V_2 - V_3}{\Delta T} - (2 \times \frac{V_4 - V_3}{2\Delta T}) = -\frac{V_1 - V_4}{\Delta T} \quad (S5)$$

789 Wherein the  $(V_1 - V_4)$  represented the measured  $\Delta V$  in this work. According to the previous  
 790 works,[11, 17] the values of thermopower of W tip ( $S_W$ ) and thermopower of EGaIn ( $S_{EGaIn}$ )  
 791 are  $\sim 1.0 \mu V/K$  and  $3.0 \mu V/K$ , respectively, hence the  $S_{SAM}$  can be extracted as follows.

$$792 \quad S_{SAM} = -\frac{V_1 - V_4}{\Delta T} - S_{EGaIn} + 2S_W = -\frac{V_1 - V_4}{\Delta T} - 1 \quad (S6)$$

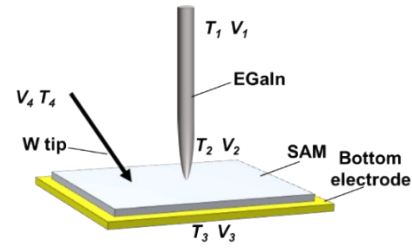

$T_2$ : temperature of EGaIn tip

$$G_{th,SAM} \approx 18 \text{ pW K}^{-1} \quad G_{th,EGaIn} \approx 26 \text{ W m}^{-1} \text{ K}^{-1}$$

$$G_{th,EGaIn} \approx 10^3 G_{th,SAM} \quad Q = G_{th,SAM} \Delta T_1 + G_{th,EGaIn} \Delta T_2$$

$$\Delta T_1 = (T_1 - T_2) \gg \Delta T_2 = (T_2 - T_3)$$

$$\text{Heat radiation: } \Delta T = \Delta T_1 \approx \Delta T_2 = \frac{1}{2} \Delta T_3 = (T_1 - T_3)$$

$$S_{EGaIn} = -\frac{V_1 - V_2}{T_1 - T_2} = -\frac{\Delta V_1}{\Delta T_1}$$

$$S_{SAM} = -\frac{V_2 - V_3}{T_2 - T_3} = -\frac{\Delta V_2}{\Delta T_2}$$

$$S_W = -\frac{V_4 - V_3}{T_4 - T_3} = -\frac{\Delta V_3}{\Delta T_3}$$

$$S_{EGaIn} + S_{SAM} - 2S_W = -\frac{V_1 - V_4}{\Delta T}$$

$$S_{SAM} = -\frac{V_1 - V_4}{\Delta T} - S_{EGaIn} + 2S_W$$

**Fig. S84.** Schematic diagram of the voltages and temperatures across Au/SAM//Ga<sub>2</sub>O<sub>3</sub>/EGaIn junction. [11]

**Determination of power factor (PF).** The values of PF of Au-SAMs//Ga<sub>2</sub>O<sub>3</sub>/EGaIn junctions were determined by the previously reported procedure. [11, 18] The magnitude of electric field intensity ( $\varepsilon$ ) can be given by:

$$\varepsilon = \frac{V}{l} (\text{GV m}^{-1}) \quad (\text{S7})$$

where  $V$  is the applied voltage and  $l$  is the molecular length considering the tilt angle (30°) of SAMs. The conductivity ( $\sigma$ ) is the inverse of resistivity, and can be obtained as follows:

$$\sigma = \frac{J}{\varepsilon} (\mu\text{S cm}^{-1}) \quad (\text{S8})$$

$J$  (A cm<sup>-2</sup>) is the current density. Using the calculated  $\sigma$  value and the measured  $S$ , the power factor (PF) value was obtained according to the following relationship:

$$PF = S^2 \sigma (\mu\text{W K}^{-2} \text{ m}^{-1}) \quad (\text{S9})$$

#### Mini-discussion about the effects of heteroatom substitutions on $G$ , $S$ and related PF. $S$

and  $G$  are derived from the charge transport in the molecular junctions under the applied temperature field and the electrical field, respectively.[19] Generally, the temperature field can only widen the Fermi distribution of the electrode. While the electrical field can regulate the relative position between the Fermi level of the electrode and the frontier orbitals of the molecules, thereby significantly affecting the potential barrier for electron tunneling in the molecular junctions or allowing more molecular orbitals to participate in charge transport [20-

815 22], making the  $G$  of the molecular junctions easier to be enhanced.

816 The value of  $S$ , to a greater extent, depend on the nature of the molecules, including the  
817 detailed location of the frontier orbitals and coupling strength between the molecules and the  
818 electrodes. The molecules designed in this study did indeed have a more pronounced  
819 improvement in  $G$  than  $S$ . Many previous studies have shown that the increased  $G$  of the  
820 molecular junctions led to a decrease in  $S$ , and vice versa [23-26] However, this work mainly  
821 proposes a molecular design method based on heteroatom substitutions to regulate the PF of  
822 the molecular junctions, which could enhance  $G$  than  $S$  at the same time and be potential for  
823 the further applications of high-efficient nanoscale thermoelectric devices.

824 According to Whitesides[14] *et al.* reported, the introducing oxygen atoms into the  
825 backbone contributed to the high-lying, delocalized molecular orbitals along the molecular  
826 skeleton direction, which remarkably improve  $G$  of the molecular junctions, consistent with  
827 our results. In order to improve  $S$ , it is necessary to simultaneously regulate the position of the  
828 frontier orbitals of molecules and the related coupling strength with the electrodes. Comparing  
829 with HS-C<sub>n</sub>, introducing oxygen atoms into the backbone did not change the coupling strength  
830 between the molecules and the electrodes, causing an insignificant effect on  $S$ . This is why we  
831 further introduced iodine atoms as the terminal group of the molecules, which could reduce the  
832 interfacial resistance of charge transfer between the molecules and the top electrode by 5 times  
833 and dramatically boost the coupling strength between the molecules and the electrodes.[1]

834

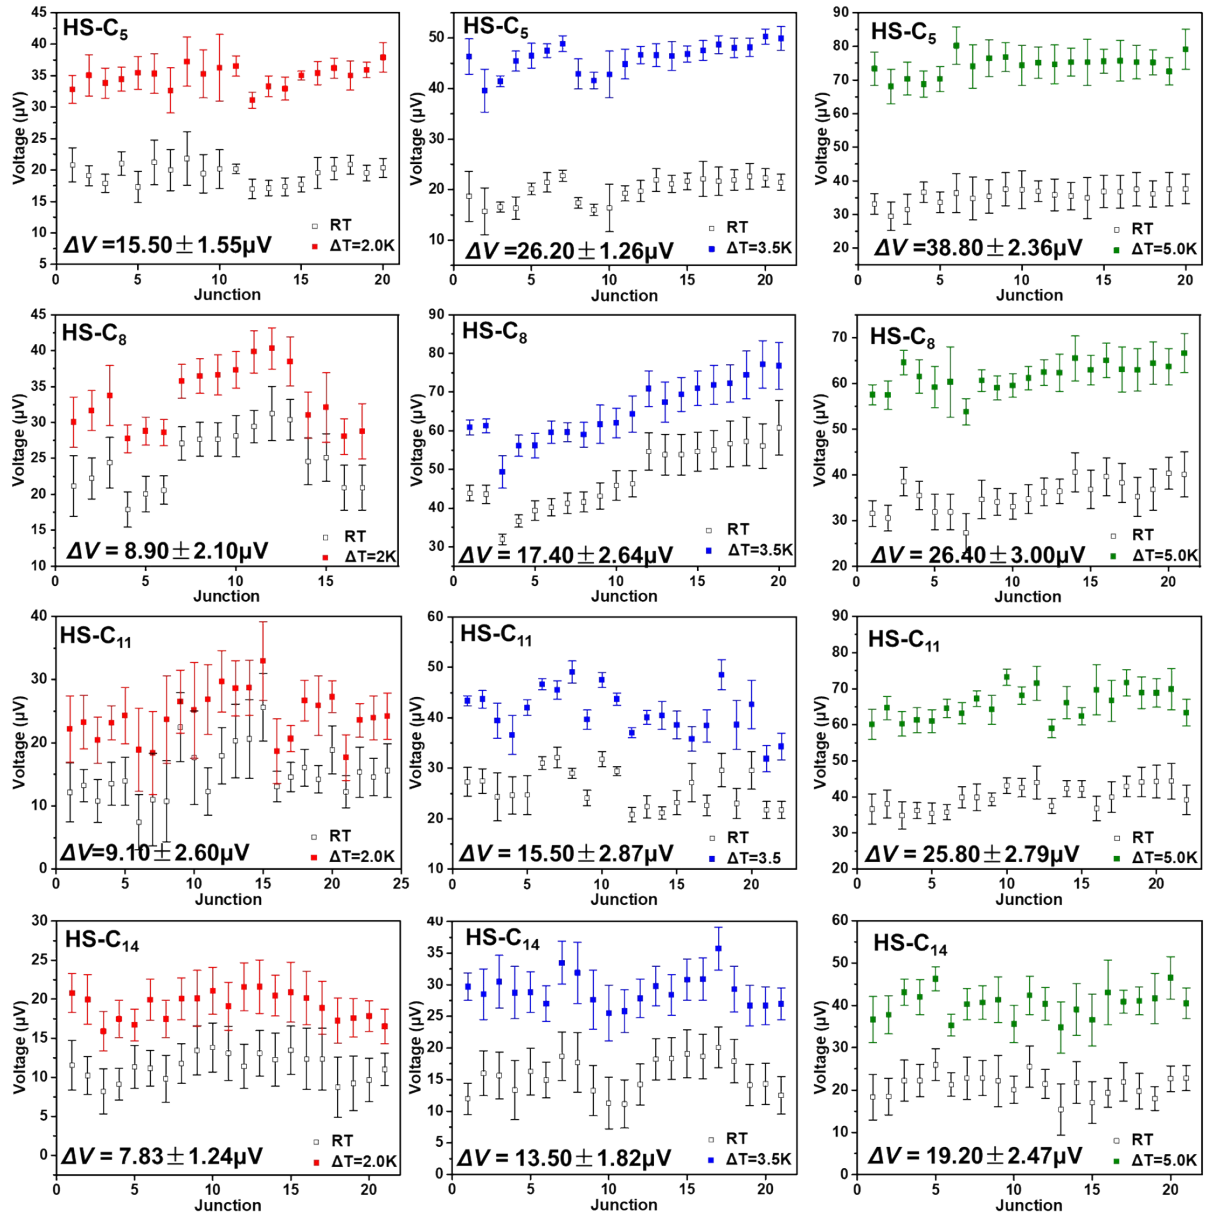

835

836 **Fig. S85.** The potential change of Au-S-C<sub>n</sub>//Ga<sub>2</sub>O<sub>3</sub>/EGaIn junctions for each junction (n =

837 5, 8, 11, 14).

838



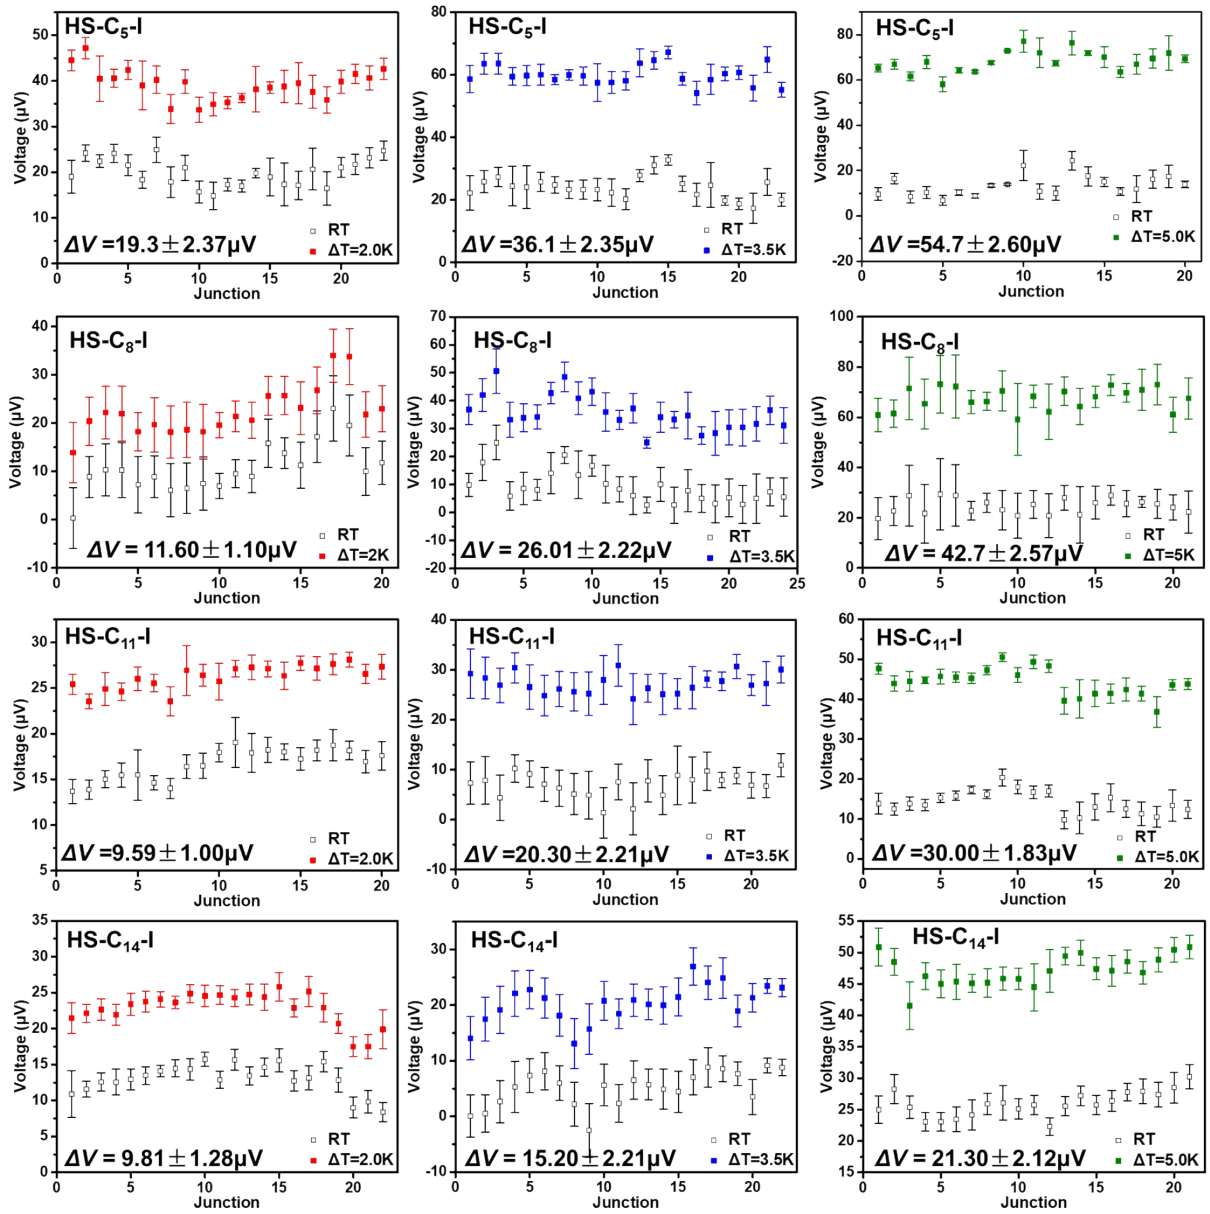

839

840 **Fig. S86.** The potential change of Au-S-C<sub>n</sub>-I//Ga<sub>2</sub>O<sub>3</sub>/EGaIn junctions for each junction

841 ( $n=5, 8, 11, 14$ ).

842

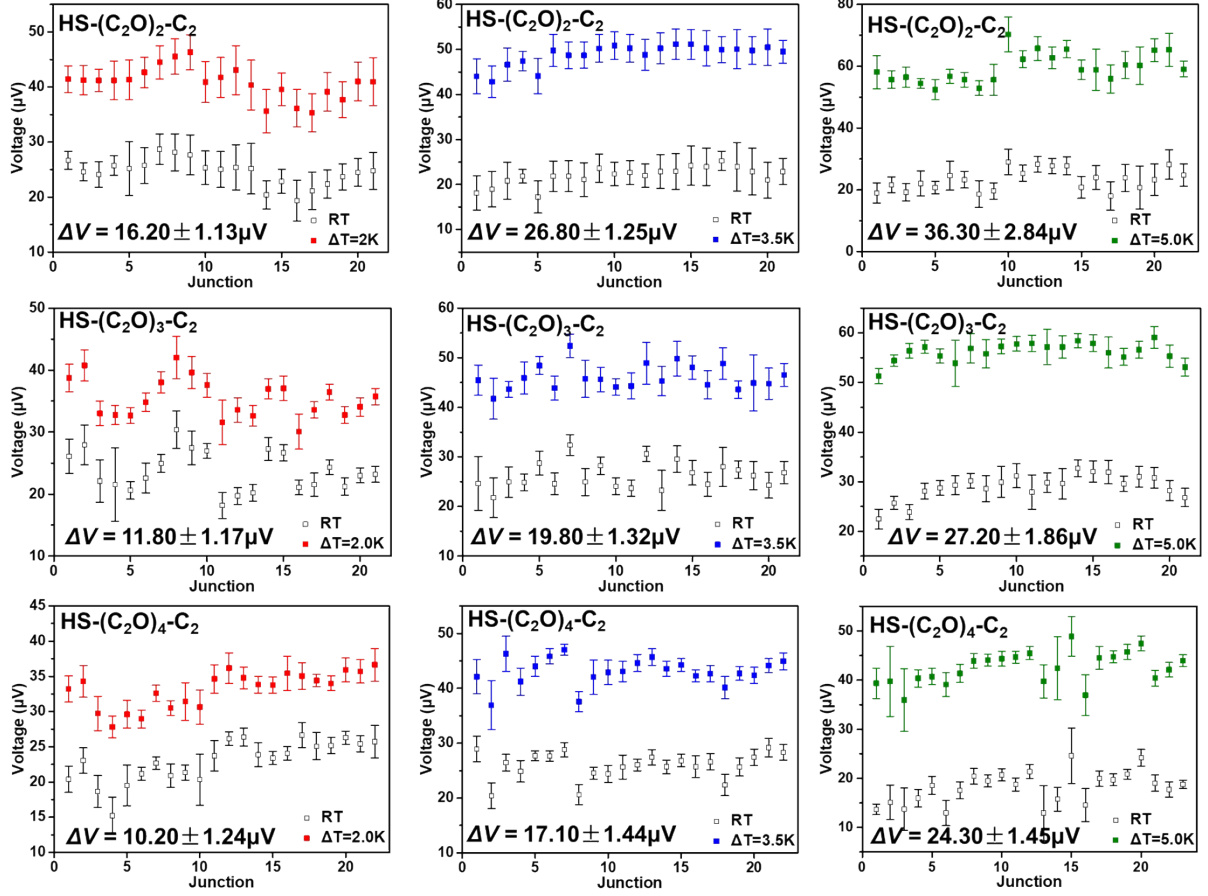

843

844 **Fig. S87.** The potential change of Au-S-(C<sub>2</sub>O)<sub>m</sub>-C<sub>2</sub>//Ga<sub>2</sub>O<sub>3</sub>/EGaIn junctions for each

845 junction ( $m = 2, 3, 4$ ).

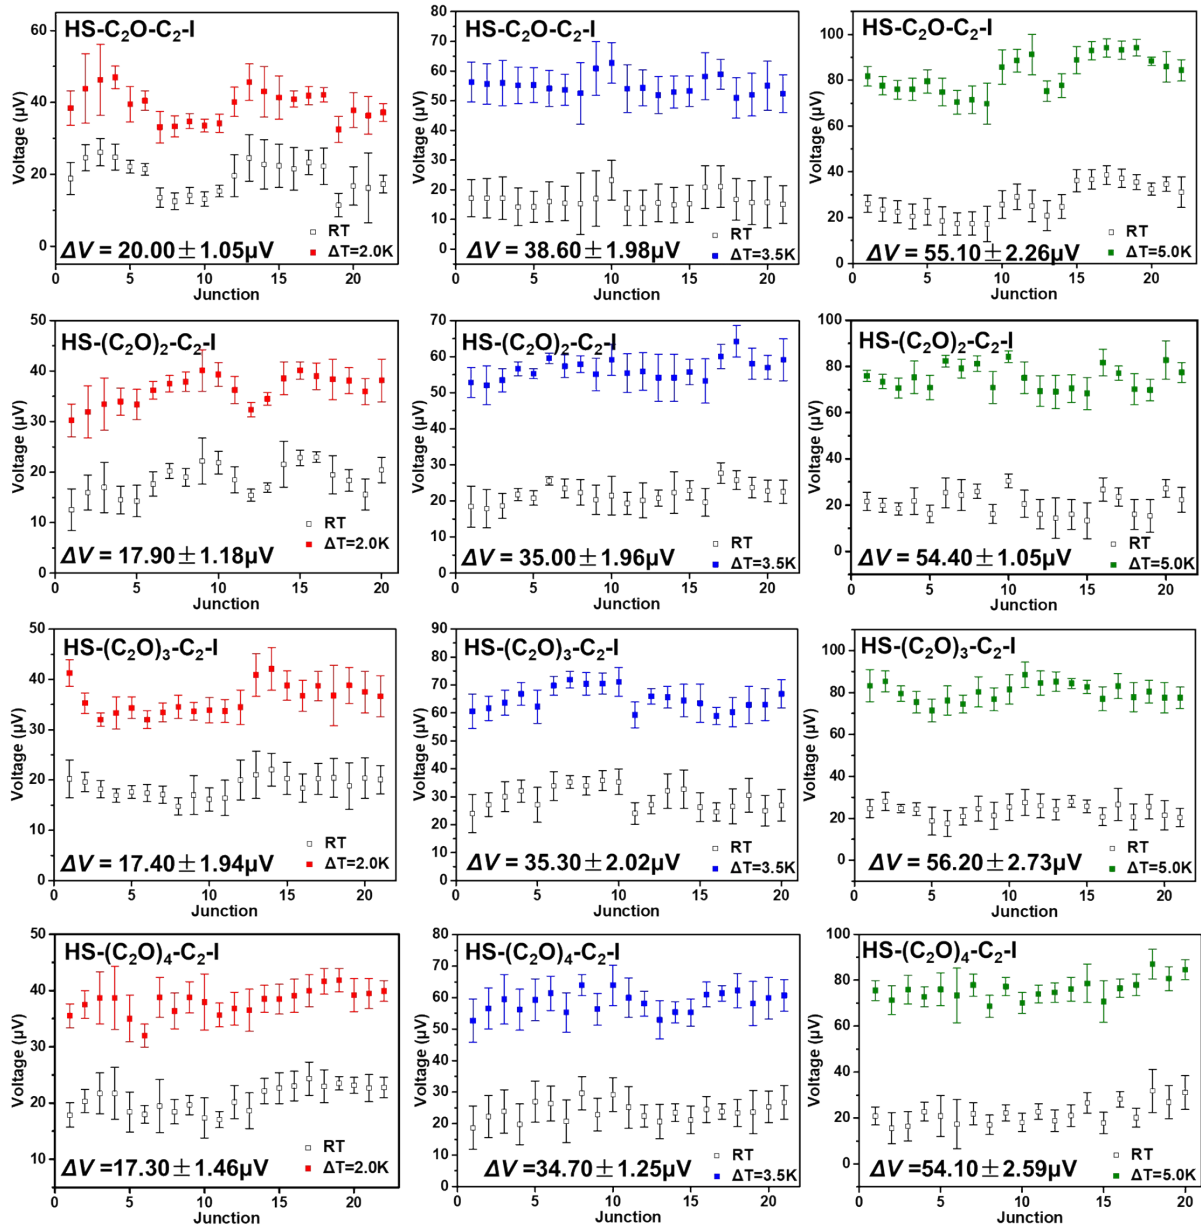

**Fig. S88.** The potential change of Au-S-(C<sub>2</sub>O)<sub>m</sub>-C<sub>2</sub>-I//Ga<sub>2</sub>O<sub>3</sub>/EGaIn junctions for each junction ( $m = 1, 2, 3, 4$ ).

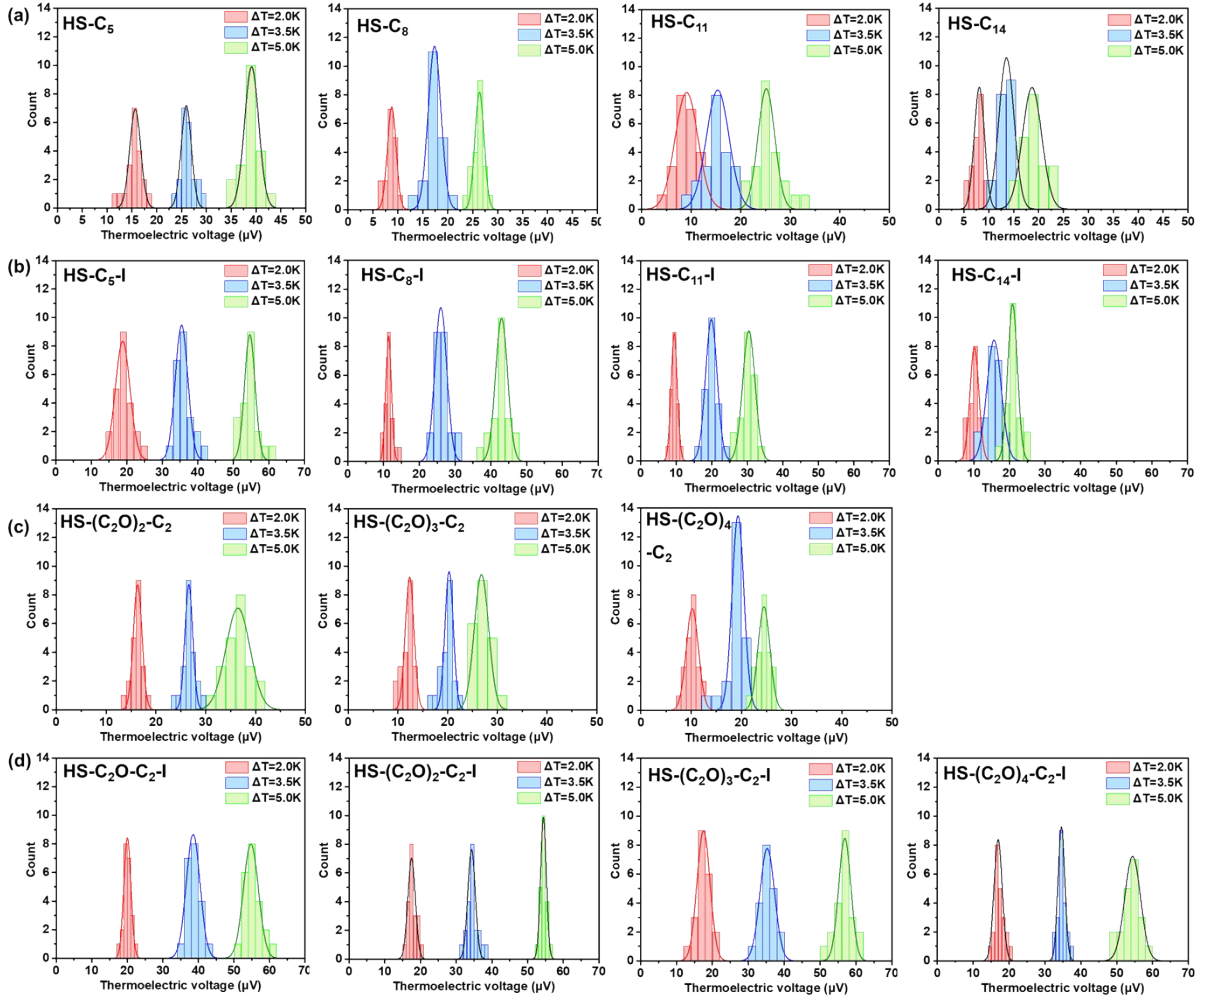

851

852 **Fig. S89.** The  $\Delta V$  at each applied  $\Delta T$  and the corresponding histograms of  $\Delta V$  with a  
 853 Gaussian fit to these histograms of Au-SAMs//Ga<sub>2</sub>O<sub>3</sub>/EGaIn junctions with (a) HS-C<sub>n</sub> (n = 5,  
 854 8, 10, 11), (b) HS-C<sub>n</sub>-I (n = 5, 8, 10, 11), (c) HS-(C<sub>2</sub>O)<sub>m</sub>-C<sub>2</sub> (m = 2, 3, 4), (d) HS-(C<sub>2</sub>O)<sub>m</sub>-C<sub>2</sub>-I  
 855 (m = 1, 2, 3, 4).

856

857

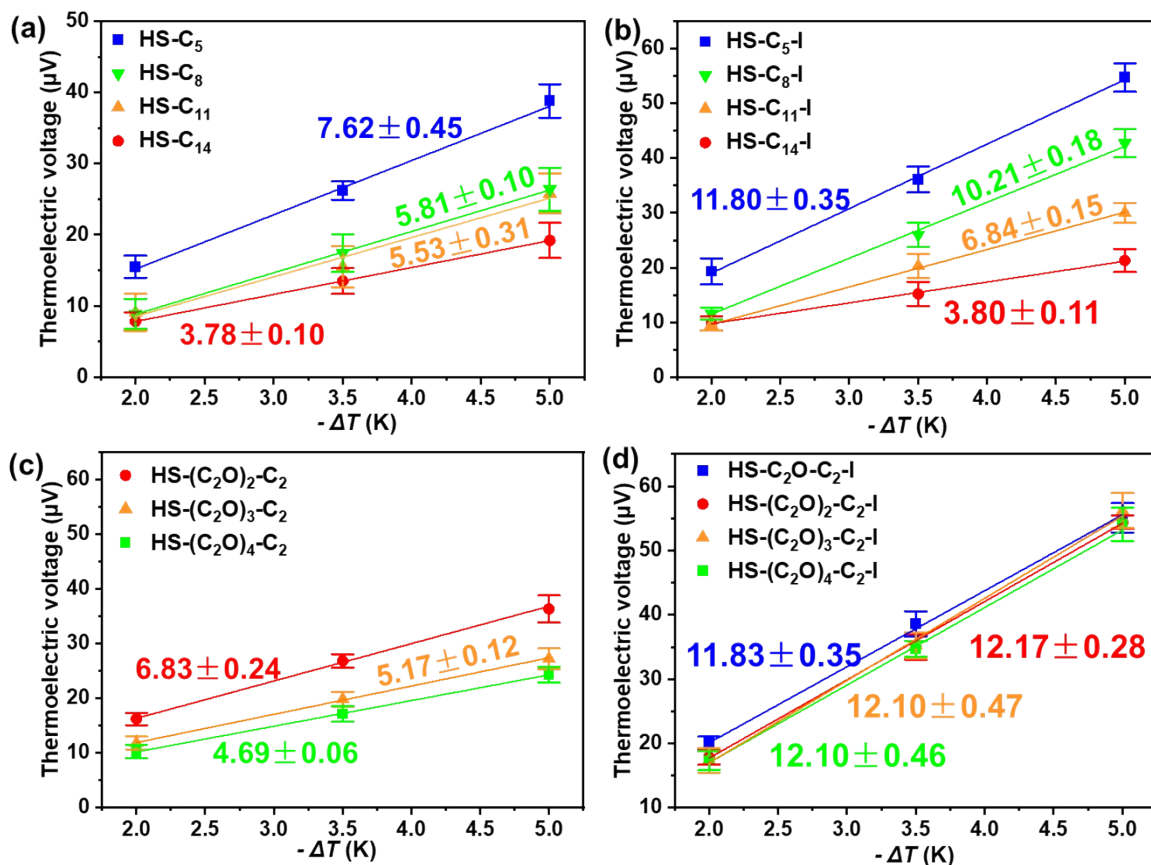

**Fig. S90.** Plots of thermoelectric voltage versus  $\Delta T$  of Au-SAMs//Ga<sub>2</sub>O<sub>3</sub>/EGaIn junctions with (a) HS-C<sub>n</sub> (n = 5, 8, 10, 11), (b) HS-C<sub>n</sub>-I (n = 5, 8, 10, 11), (c) HS-(C<sub>2</sub>O)<sub>m</sub>-C<sub>2</sub> (m = 2, 3, 4), (d) HS-(C<sub>2</sub>O)<sub>m</sub>-C<sub>2</sub>-I (m = 1, 2, 3, 4).

## S6. DFT calculation.

**Electronic structure.** The electronic structures of the considered junctions were calculated using the SIESTA package at DFT level. The standard norm-conserving pseudopotentials and a numerical linear combination of an atomic orbital basis set were employed in this package. We used the double- $\zeta$  polarized (DZP) basis sets for H, C, O, S and I atoms and single- $\zeta$  polarized (SZP) for Au. A real-space grid was defined with an energy cutoff of 200 Ry. All atoms, except for the Au electrode, were relaxed until the forces acting on them were less than 0.02 eV/Å. The temperature used for calculation of thermoelectric coefficient was set as 300 K. The optimized structures of molecular junctions are shown in Fig. S91 and S94.

**Transmission coefficients.** Upon the electronic structures were obtained from the converged

873 DFT calculation, we can calculate the transmission coefficients by means of the non-  
 874 equilibrium Green's function method implemented in TRANSIESTA and the "post-  
 875 processing" code TBtrans. To eliminate the influence of surface states on top electrode, the  
 876 wide-band approximation was employed based on the convergent hamiltonian and overlap  
 877 matrix (Fig. S95).

878 **Thermoelectric coefficients.** Based on the calculated transmission coefficients, the electrical  
 879 conductance ( $G$ ), Seebeck coefficient ( $S$ ) and power factor (PF) can be calculated in the  
 880 framework of a linear response regime. The  $G$ ,  $S$  and PF can be written as follows:

$$881 \quad G(\mu, T) = \frac{I}{\Delta V} \Big|_{\Delta T = 0} = e^2 L_0 \quad (10)$$

$$882 \quad S(\mu, T) = - \frac{\Delta V}{\Delta T} \Big|_{I = 0} = - \frac{1}{eT} \frac{L_1}{L_0} \quad (11)$$

$$883 \quad PF = GS^2 \quad (12)$$

884 Here the coefficient  $L_n$  dependent on the transmission coefficient.

$$885 \quad L_n(\mu, T) = \frac{1}{h} \int_{-\infty}^{\infty} (E - \mu)^n T(E) \left( - \frac{\partial f(E, \mu, T)}{\partial E} \right) dE \quad (13)$$

886 The Fermi energy also depends on the experimental conditions, such as the adsorbed water, the  
 887 defects in the electrodes, which gives rise to the discrepancy between experimental and DFT-  
 888 predicted values. [27-29] Therefore, our calculated Fermi level may not capture the real  
 889 electronic structure of our junctions. We find that only when the Fermi level is located near  
 890 these resonant states ( $E = -1.83$  eV), could the theoretical results be consistent with  
 891 experimental ones, that may because we used the both Au electrodes to simplify the real liquid  
 892 metal-based junctions.

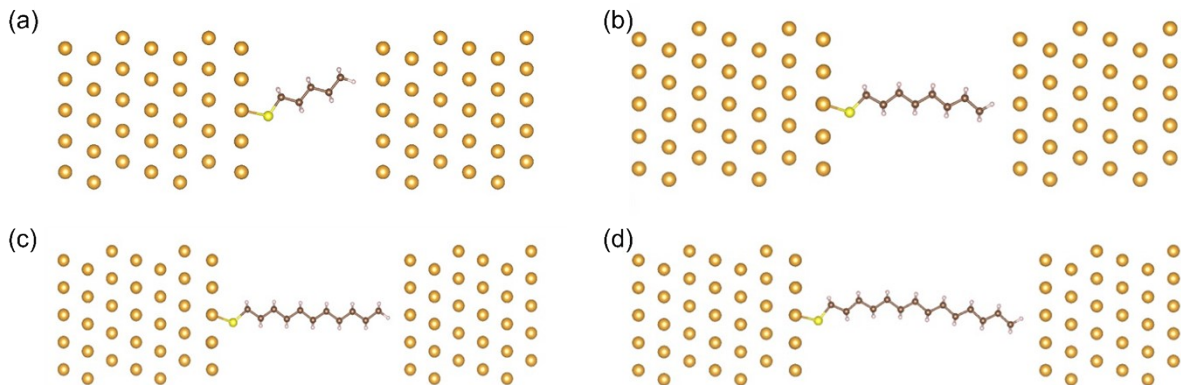

893



894 **Fig. S91.** The optimized structure of molecular junctions for (a) HS-C<sub>5</sub>, (b) HS-C<sub>8</sub>, (c) HS-  
 895 C<sub>11</sub>, (d) HS-C<sub>14</sub>.

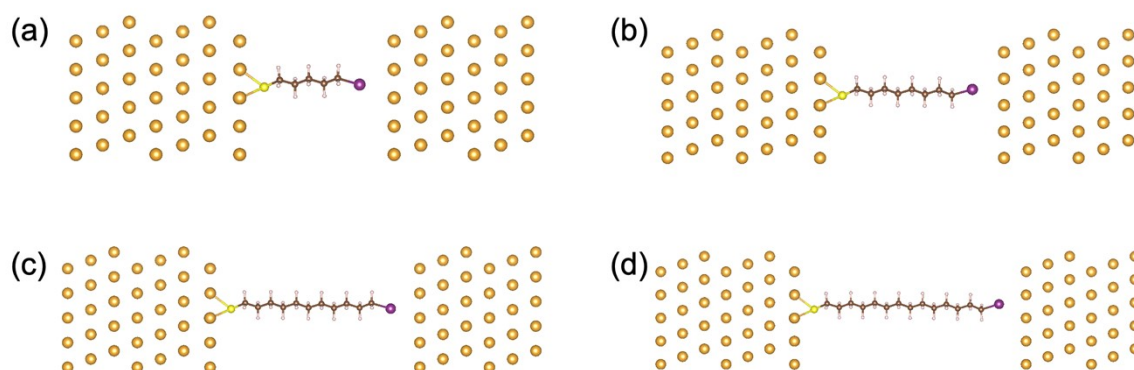

896

897 **Fig. S92.** The optimized structure of molecular junctions for (a) HS-C<sub>5</sub>-I, (b) HS-C<sub>8</sub>-I, (c)  
 898 HS-C<sub>11</sub>-I, (d) HS-C<sub>14</sub>-I.

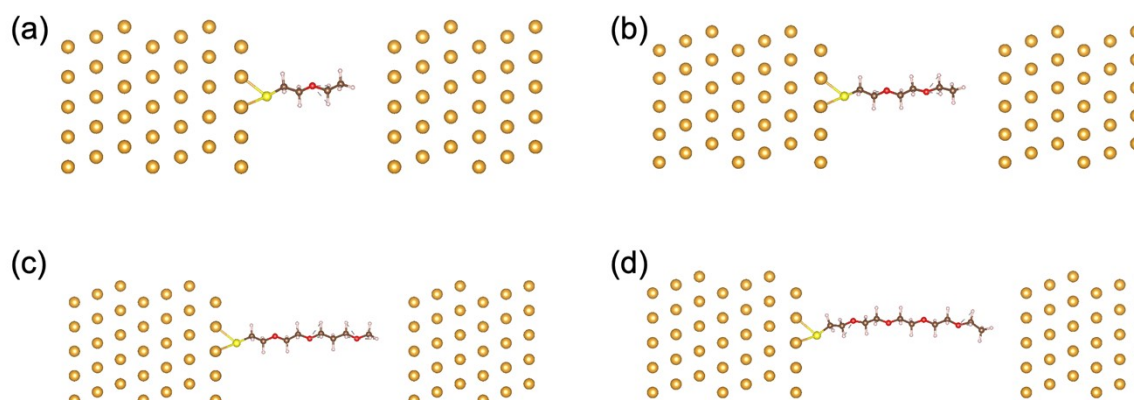

899

900 **Fig. S93.** The optimized structure of molecular junctions for (a) HS-C<sub>2</sub>O-C<sub>2</sub>, (b) HS-(C<sub>2</sub>O)<sub>2</sub>-  
 901 C<sub>2</sub>, (c) HS-(C<sub>2</sub>O)<sub>3</sub>-C<sub>2</sub>, (d) HS-(C<sub>2</sub>O)<sub>4</sub>-C<sub>2</sub>.

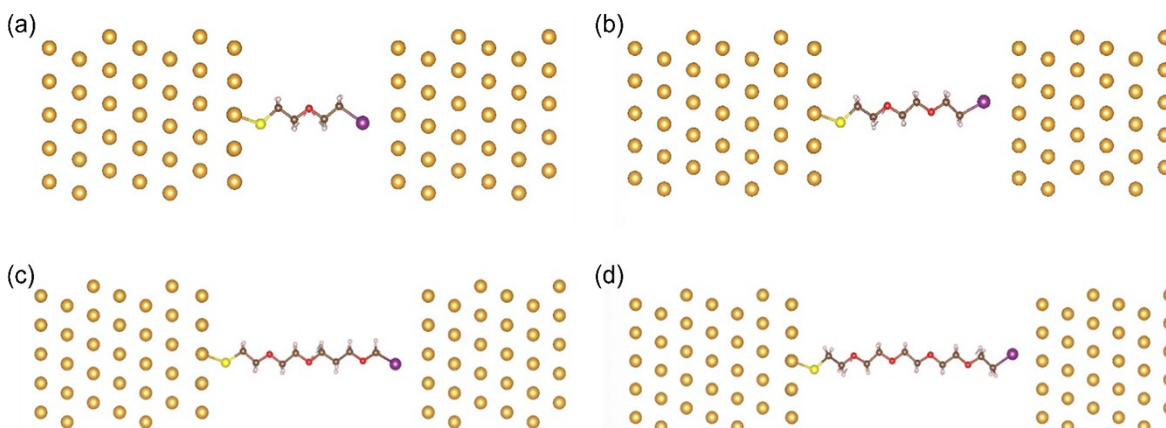

902

903 **Fig. S94.** The optimized structure of molecular junctions for (a) HS-C<sub>2</sub>O-C<sub>2</sub>-I, (b) HS-  
 904 (C<sub>2</sub>O)<sub>2</sub>-C<sub>2</sub>-I, (c) HS-(C<sub>2</sub>O)<sub>3</sub>-C<sub>2</sub>-I, (d) HS-(C<sub>2</sub>O)<sub>4</sub>-C<sub>2</sub>-I.  
 905

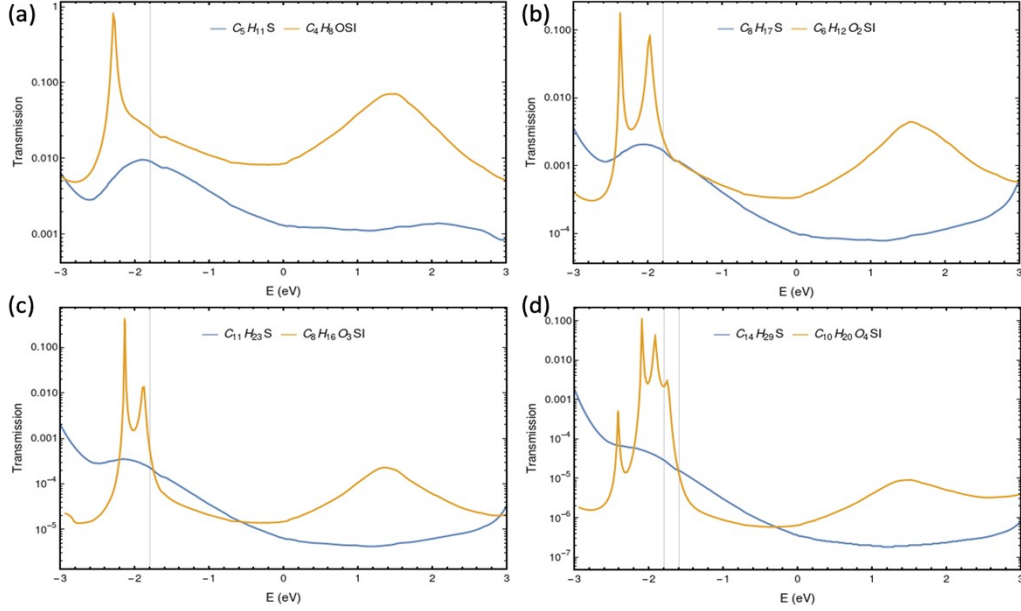

906  
 907 **Fig. S95.** The calculated transmission coefficient for (a) HS-C<sub>5</sub>, HS-C<sub>2</sub>O-C<sub>2</sub>-I, (b) HS-C<sub>8</sub>,  
 908 HS-(C<sub>2</sub>O)<sub>2</sub>-C<sub>2</sub>-I, (c) HS-C<sub>11</sub>, HS-(C<sub>2</sub>O)<sub>3</sub>-C<sub>2</sub>-I, (d) HS-C<sub>14</sub>, HS-(C<sub>2</sub>O)<sub>4</sub>-C<sub>2</sub>-I.  
 909

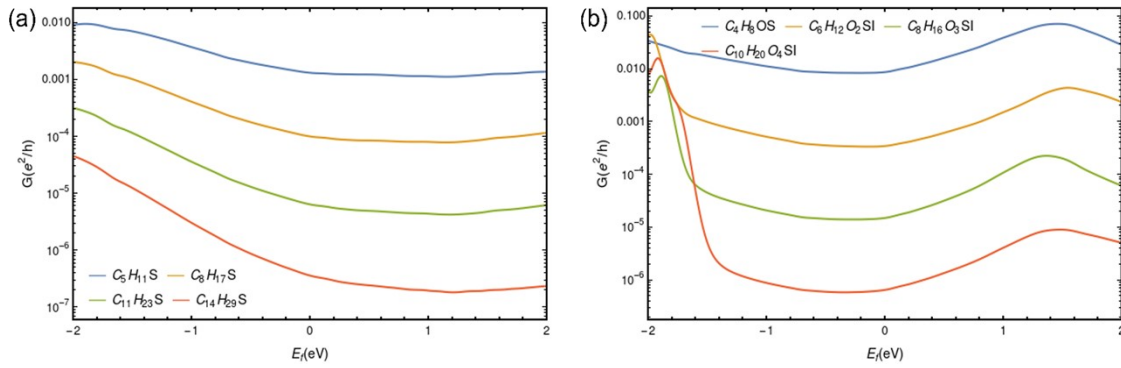

910  
 911 **Fig. S96.** The calculated electrical conductance ( $G$ ) with different Fermi energy for (a) HS-C<sub>n</sub>,  
 912 (b) HS-(C<sub>2</sub>O)<sub>m</sub>-C<sub>2</sub>-I.  
 913



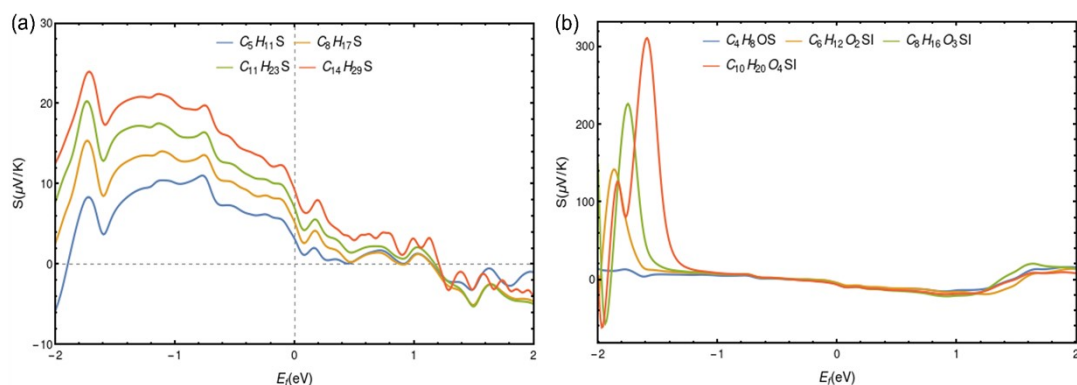

914  
 915 **Fig. S97.** The calculated Seebeck coefficients ( $S$ ) with different Fermi energy for (a) HS-C<sub>n</sub>,  
 916 (b) HS-(C<sub>2</sub>O)<sub>m</sub>-C<sub>2</sub>-I.

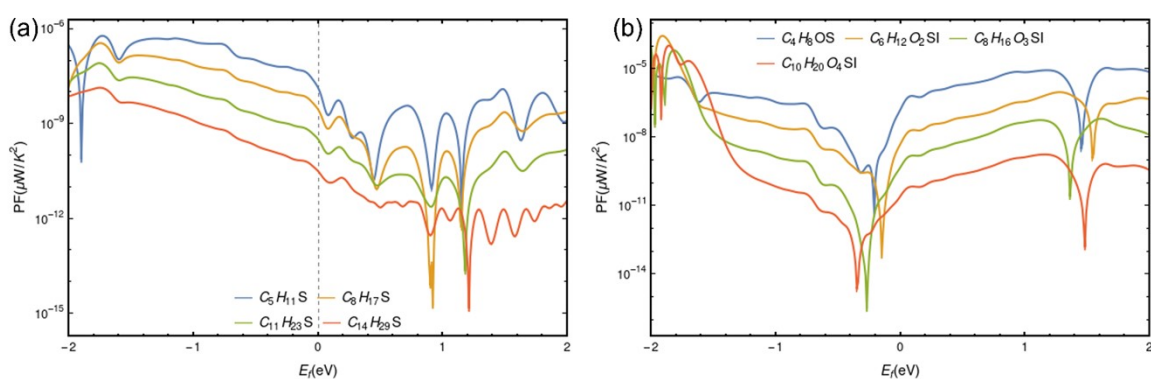

917  
 918 **Fig. S98.** The calculated power factor (PF) with different Fermi energy for (a) HS-C<sub>n</sub>, (b)  
 919 HS-(C<sub>2</sub>O)<sub>m</sub>-C<sub>2</sub>-I.

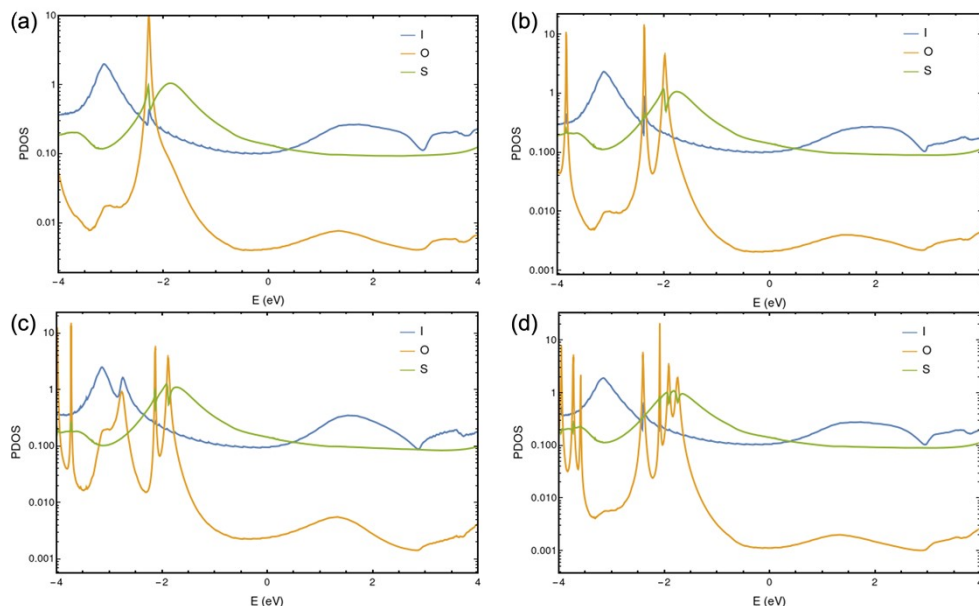

920  
 921 **Fig. S99.** The calculated projected density of states (PDOS) for (a) HS-C<sub>2</sub>O-C<sub>2</sub>-I, (b) HS-  
 922 (C<sub>2</sub>O)<sub>2</sub>-C<sub>2</sub>-I, (c) HS-(C<sub>2</sub>O)<sub>3</sub>-C<sub>2</sub>-I, (d) HS-(C<sub>2</sub>O)<sub>4</sub>-C<sub>2</sub>-I.

## 923 References

- 924 [1] X. Chen, B. Kretz, F. Adoah, C. Nickle, X. Chi, X. Yu, E.d. Barco, D. Thompson, D.A. Egger, C.A.  
 925 Nijhuis, A single atom change turns insulating saturated wires into molecular conductors, *Nat. Commun.* 12  
 926 (2021) 3432.
- 927 [2] K. Wang, X. Cai, W. Yao, D. Tang, R. Kataria, H.S. Ashbaugh, L.D. Byers, B.C. Gibb, Electrostatic  
 928 Control of Macrocyclization Reactions within Nanospaces, *J. Am. Chem. Soc.* 141 (2019) 6740.
- 929 [3] M. von Delius, F. Hauke, A. Hirsch, Evaluation of an Intramolecular Approach for the Synthesis of the  
 930 Elusive C58N2Heterofullerene Family, *Eur. J. Org. Chem.* (2008) 4109.
- 931 [4] C. Wendeln, S. Rinnen, C. Schulz, T. Kaufmann, H.F. Arlinghaus, B.J. Ravoo, Rapid preparation of  
 932 multifunctional surfaces for orthogonal ligation by microcontact chemistry, *Chem. Eur. J.* 18 (2012) 5880.
- 933 [5] O. Zenasni, A.C. Jamison, M.D. Marquez, T.R. Lee, Self-assembled monolayers on gold generated from  
 934 terminally perfluorinated alkanethiols bearing propyl vs. ethyl hydrocarbon spacers, *J. Fluorine Chem.* 168  
 935 (2014) 128.
- 936 [6] Y. Cao, M. Zhang, C. Wu, S. Lee, M.E. Wroblewski, T. Whipple, P.I. Nagy, K. Takács-Novák, A. Balázs,  
 937 S. Torös, J. William S. Messer, Synthesis and Biological Characterization of 1-Methyl-1,2,5,6-  
 938 tetrahydropyridyl-1,2,5-thiadiazole Derivatives as Muscarinic Agonists for the Treatment of Neurological  
 939 Disorders, *J. Med. Chem.* 46 (2003) 4273.
- 940 [7] J. Provencher-Mandeville, C. Descoteaux, S.K. Mandal, V. Leblanc, E. Asselin, G. Berube, Synthesis of  
 941 17beta-estradiol-platinum(II) hybrid molecules showing cytotoxic activity on breast cancer cell lines,  
 942 *Bioorg. Med. Chem. Lett.* 18 (2008) 2282.
- 943 [8] Y. Aoki, N. Umezawa, Y. Asano, K. Hatano, Y. Yano, N. Kato, T. Higuchi, A versatile strategy for the  
 944 synthesis of crown ether-bearing heterocycles: Discovery of calcium-selective fluoroionophore, *Bioorg.*  
 945 *Med. Chem. Lett.* 15 (2007) 7108.
- 946 [9] Y. Li, L. Jiang, B. Zhang, C.A. Nijhuis, Dependency of the tunneling decay coefficient in molecular  
 947 tunneling junctions on the topography of the bottom electrodes, *Angew. Chem. Int. Edit.* 53 (2014) 3377.
- 948 [10] J.-L. Lin, Z. Cao, X. Bai, N. Chen, C. Li, X. Xiao, L. Wang, Y. Li, Molecular diodes with tunable  
 949 threshold voltage based on  $\pi$ -extended tetrathiafulvalene, *Adv. Mater. Interfaces* 9 (2022) 2201238.
- 950 [11] W. Peng, Z. Cao, N. Chen, Y. Xie, Y. Li, Dependence of thermoelectric effects in molecular junctions  
 951 on the topography of the bottom electrodes, *J. Mater. Chem. A* 10 (2022) 23304.
- 952 [12] S. Doniach, M. Sunjic, Many-electron singularity in X-ray photoemission and X-ray line spectra from  
 953 metals, *J. Phys. C Solid State Phys.* 3 (1970) 285.
- 954 [13] Y. Han, C. Nickle, Z. Zhang, H. Astier, T.J. Duffin, D. Qi, Z. Wang, E. del Barco, D. Thompson, C.A.  
 955 Nijhuis, Electric-field-driven dual-functional molecular switches in tunnel junctions, *Nat. Mater.* 19 (2020)  
 956 843.
- 957 [14] M. Baghbanzadeh, C.M. Bowers, D. Rappoport, T. Žaba, Y. Li, K. Kang, K.-C. Liao, M. Gonidec, P.  
 958 Rothmund, P. Cyganik, A. Aspuru-Guzik, G.M. Whitesides, Anomalous Rapid Tunneling: Charge  
 959 Transport across Self-Assembled Monolayers of Oligo(ethylene glycol), *J. Am. Chem. Soc.* 139 (2017) 7624.
- 960 [15] D. Wang, D. Fracasso, A. Nurbawono, H.V. Annadata, C.S.S. Sangeeth, Y. Li, C.A. Nijhuis, Tuning  
 961 the Tunneling Rate and Dielectric Response of SAM-Based Junctions via a Single Polarizable Atom, *Adv.*  
 962 *Mater.* 27 (2015) 6689.
- 963 [16] A. Tan, J. Balachandran, S. Sadat, V. Gavini, B.D. Dunietz, S.Y. Jang, P. Reddy, Effect of length and

964 contact chemistry on the electronic structure and thermoelectric properties of molecular junctions, *J. Am.*  
 965 *Chem. Soc. 133* (2011) 8838.  
 966 [17] S. Park, H.J. Yoon, New approach for large-area thermoelectric junctions with a liquid eutectic Gallium-  
 967 Indium electrode, *Nano Lett. 18* (2018) 7715.  
 968 [18] S. Park, S. Kang, H.J. Yoon, Power factor of one molecule thick films and length dependence, *ACS*  
 969 *Cent. Sci. 5* (2019) 1975.  
 970 [19] K. Wang, E. Meyhofer, P. Reddy, Thermal and thermoelectric properties of molecular junctions, *Adv.*  
 971 *Funct. Mater. 30* (2019) 1904534.  
 972 [20] H. Xu, H. Fan, Y. Luan, S. Yan, L. Martin, R. Miao, F. Pauly, E. Meyhofer, P. Reddy, H. Linke, K.  
 973 Wärnmark, Electrical Conductance and Thermopower of  $\beta$ -Substituted Porphyrin Molecular Junctions-  
 974 Synthesis and Transport, *J. Am. Chem. Soc. 145* (2023) 23541.  
 975 [21] Y. Xie, C.-Y. Wang, N. Chen, Z. Cao, G. Wu, B. Yin, Y. Li, Supramolecular memristor based on  
 976 bistable [2]catenanes: toward  
 977 high-density and non-volatile memory devices, *Angew. Chem. Int. Ed. 62* (2023) e202309605.  
 978 [22] G.D. Kong, S.E. Byeon, J. Jang, J.W. Kim, H.J. Yoon, Electronic mechanism of *in situ* inversion of  
 979 rectification polarity in supramolecular engineered monolayer, *J. Am. Chem. Soc. 144* (2022) 7966.  
 980 [23] J. Jang, J.W. Jo, T. Ohto, H.J. Yoon, Seebeck effect in molecular wires facilitating long-range transport,  
 981 *J. Am. Chem. Soc. 146* (2024) 4922.  
 982 [24] A. Ismael, X. Wang, T.L.R. Bennet, L.A. Wilkinson, B.J. Robinson, C.J. Lambert, Tuning the  
 983 thermoelectrical properties of anthracene-based self-assembled monolayers, *Chem. Sci. 11* (2020) 6836.  
 984 [25] X. Wang, T.L.R. Bennett, A. Ismael, L.A. Wilkinson, J. Hamill, A.J.P. White, I.M. Grace, O.V.  
 985 Kolosov, T. Albrecht, B.J. Robinson, N.J. Long, L.F. Cohen, C.J. Lambert, Scale-up of room-temperature  
 986 constructive quantum interference from single molecules to self-assembled molecular-electronic films, *J.*  
 987 *Am. Chem. Soc. 142* (2020) 8555.  
 988 [26] R. Miao, H. Xu, M. Skripnik, L. Cui, K. Wang, K.G.L. Pedersen, M. Leijnse, F. Pauly, K. Wärnmark,  
 989 E. Meyhofe, P. Reddy, H. Linke, Influence of quantum interference on the thermoelectric properties of  
 990 molecular junctions, *Nano Lett. 18* (2018) 5666.  
 991 [27] S.A. Svatek, V. Sacchetti, L. Rodríguez-Pérez, B.M. Illescas, L. Rincón-García, G. Rubio-Bollinger,  
 992 M.T. González, S. Bailey, C.J. Lambert, N. Martín, a.N.s. Agraït, Enhanced thermoelectricity in  
 993 metal-[60]fullerene-graphene molecular junctions, *Nano Lett. 23* (2023) 2726.  
 994 [28] L. Rincón-García, A.K. Ismael, C. Evangeli, I. Grace, G. Rubio-Bollinger, K. Porfyrakis, N. Agraït,  
 995 C.J. Lambert, Molecular design and control of fullerene-based bi-thermoelectric materials, *Nat. Mater. 15*  
 996 (2016) 289.  
 997 [29] Y. Hu, J. Li, YuZhou, J. Shi, G. Li, H. Song, Y. Yang, J. Shi, W. Hong, Single dynamic covalent bond  
 998 tailored responsive molecular junctions, *Angew. Chem. Int. Ed. Engl. 60* (2021) 20872.  
 999
